# Supplementary material for: A theoretical insight into the curing mechanism of phthalonitrile resins promoted by aromatic amines
Source: Royal Society of Chemistry journal article supplement (doi:10.1039/d1cp01947c), 2021-01-01
Supplement: d1cp01947c1.pdf [file d1cp01947c1.pdf]

## Supplementary Information for

# A Theoretical Insight into the Curing Mechanism of Phthalonitrile Resins Promoted by Aromatic Amines

Zuwei Chen, Liquan Wang\*, Jiaping Lin\* and Lei Du

Shanghai Key Laboratory of Advanced Polymeric Materials, Key Laboratory for Ultrafine Materials  
of Ministry of Education, Frontiers Science Center for Materiobiology and Dynamic Chemistry,  
School of Materials Science and Engineering, East China University of Science and Technology,  
Shanghai 200237, China

---

**Corresponding Author**

\* Tel: +86-21-64253370; E-mail: [jlin@ecust.edu.cn](mailto:jlin@ecust.edu.cn) (J. Lin) and [lq\\_wang@ecust.edu.cn](mailto:lq_wang@ecust.edu.cn) (L. Wang)

## Contents

1. Transition states in the reaction pathways ..... S3
2. Free energy surfaces based on the uncorrected free energies ..... S6
3. Cartesian coordinates and associated energies ..... S10

## 1. Transition states in the reaction pathways

The structures of transition states in reaction pathways shown in Schemes 3-8 are presented below. The imaginary vibrational frequency ( $\nu^\ddagger$ ,  $i \text{ cm}^{-1}$ ) and atomic distances ( $\text{\AA}$ ) of the corresponding transition state are also given.

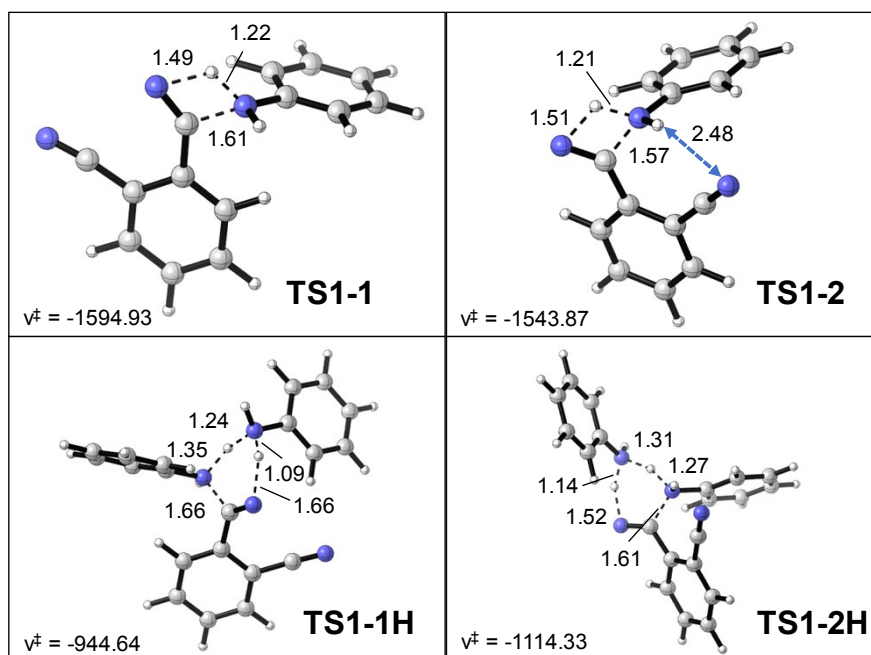

**Figure S1.** Transition states for the reaction pathways shown in Scheme 3.

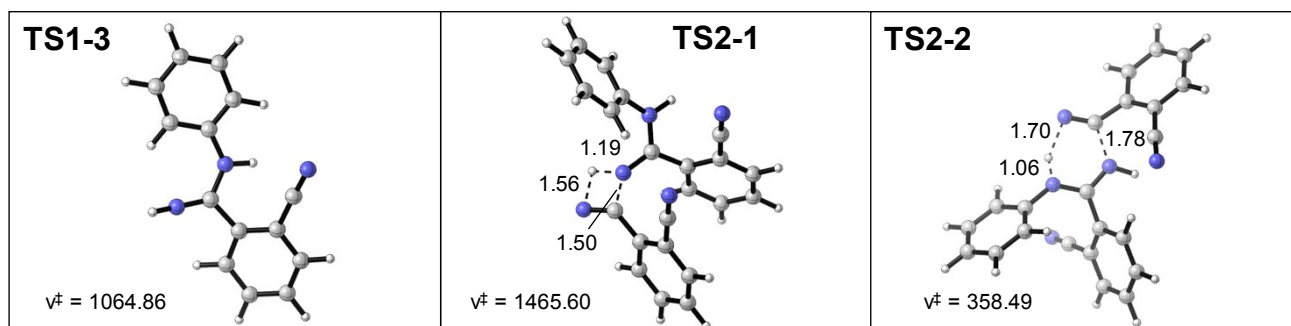

**Figure S2.** Transition states for the reaction pathways shown in Scheme 4.

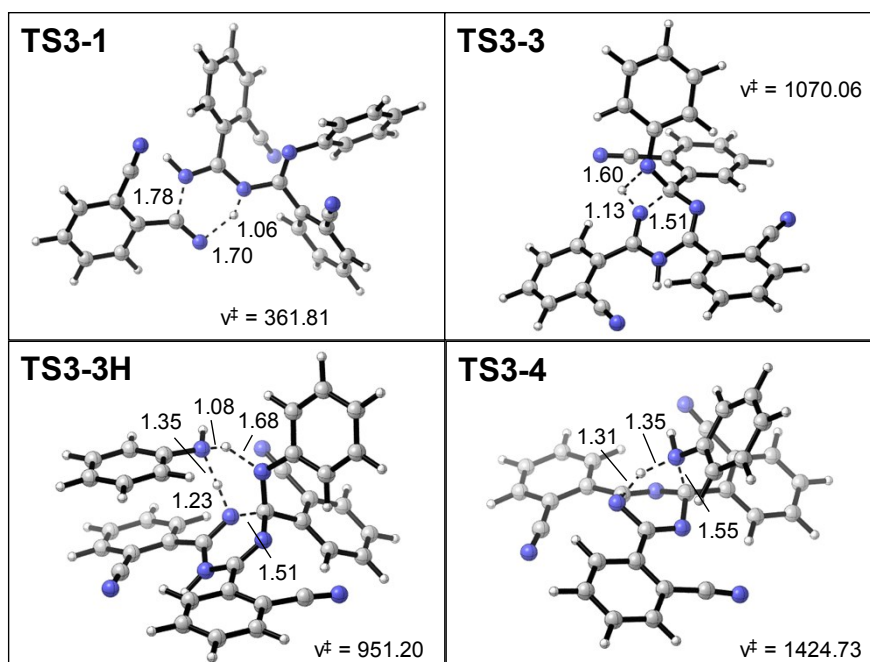

**Figure S3.** Transition states for the reaction pathways shown in Scheme 5.

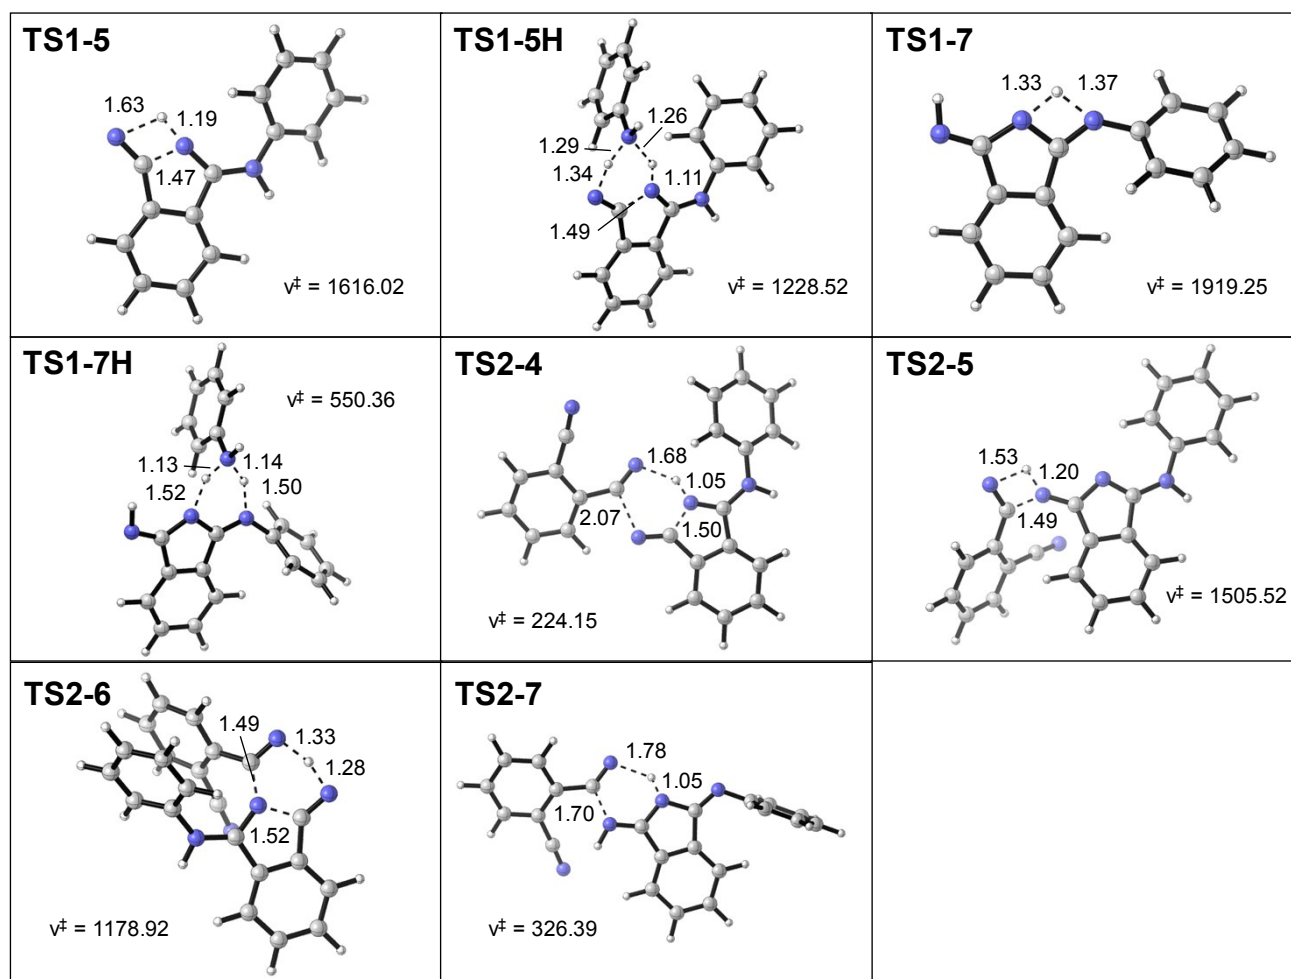

**Figure S4.** Transition states for the reaction pathways shown in Scheme 6.

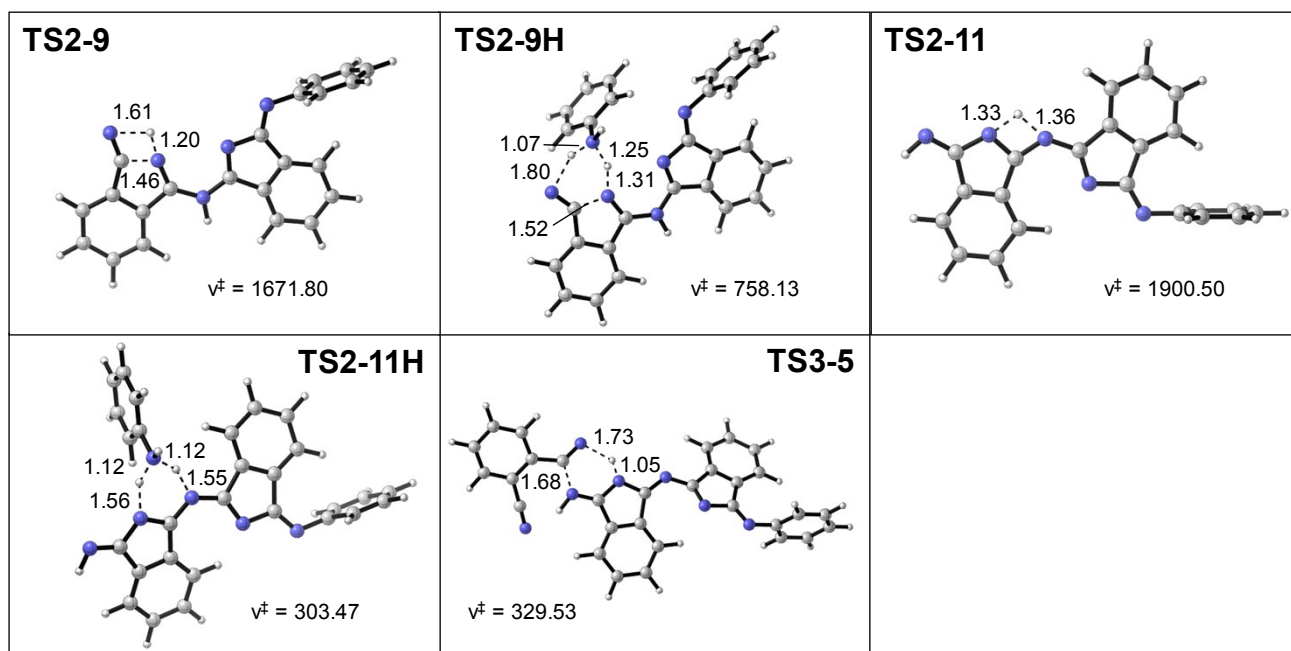

**Figure S5.** Transition states for the reaction pathways shown in Scheme 7.

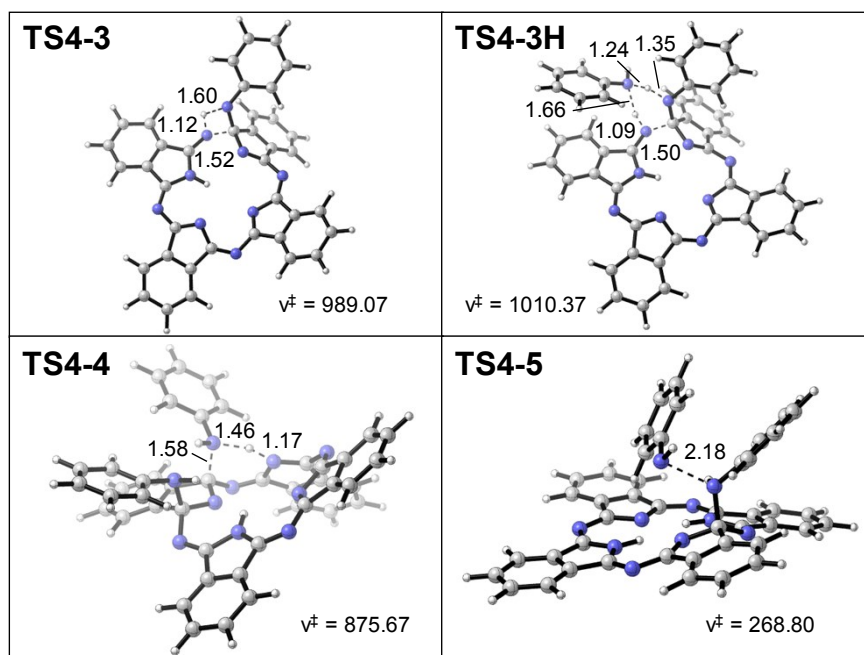

**Figure S6.** Transition states for the reaction pathways shown in Scheme 8.

## 2. Free energy surfaces based on the uncorrected free energies in the gas phase

As the entropic contributions to the relative free energies estimated by the ideal gas model were overestimated, the uncorrected activation free energies in the gas phase for bimolecular reaction seem too high to be overcome, as can be seen from Figures S7-S12. It implies that the correction for the free energies of activation is necessary to obtain a reasonable result in kinetics. Nevertheless, the qualitative picture from the uncorrected free energy surfaces is similar to that from the corrected free energy surfaces shown in the text.

The curing of resins is usually an exothermic reaction. The relative enthalpies are also given to understand the heat release of reaction and guide the curing of larger and thick composites. One can see that the formation of triazine is exothermic by 59.3 kcal mol<sup>-1</sup> (see Figure S9), and the formation of phthalocyanine is exothermic by 101.2 kcal mol<sup>-1</sup> (see Figure S12). In other words, the heat releases of forming thiazine and phthalocyanine are exothermic by 19.8 kcal and 25.3 kcal per mole of consuming phthalonitrile monomers, respectively. It implies that the curing reaction forming cross-links of triazine has a lower exothermic effect, which is more favorable for phthalonitrile resins to be used in thick composite parts.

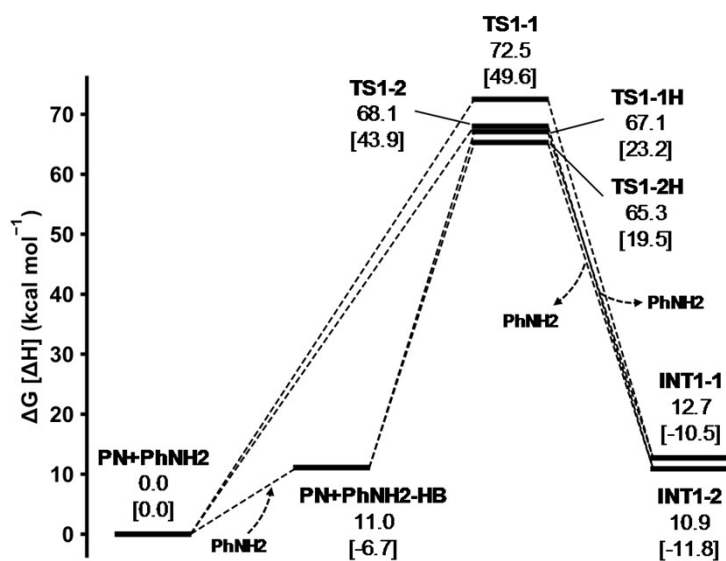

**Figure S7.** Free energy surfaces of the nucleophilic addition of aniline **PhNH<sub>2</sub>** or its hydrogen bonding complex **PhNH<sub>2</sub>-HB** to nitrile group on phthalonitrile **PN**.  $\Delta G$  presents the relative free energy in the gas phase without correction. Relative enthalpies are given in brackets.

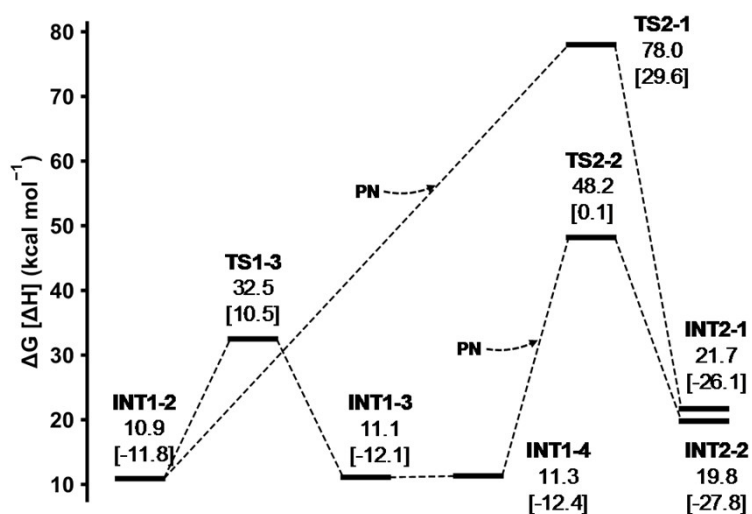

**Figure S8.** Free energy surfaces of the reaction pathways from amidine intermediate **INT1-2**.  $\Delta G$  presents the relative free energy in the gas phase without correction. Relative enthalpies are given in brackets.

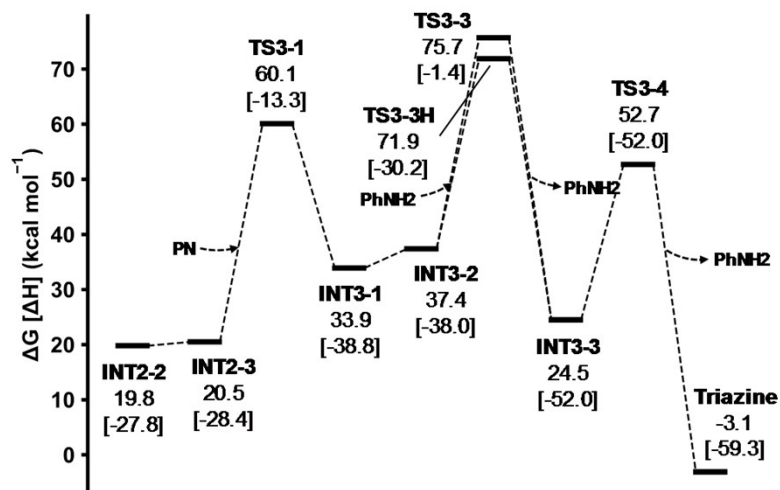

**Figure S9.** Free energy surfaces of the formation of triazine from amidine intermediate INT2-2.  $\Delta G$  presents the relative free energy in the gas phase without correction. Relative enthalpies are given in brackets.

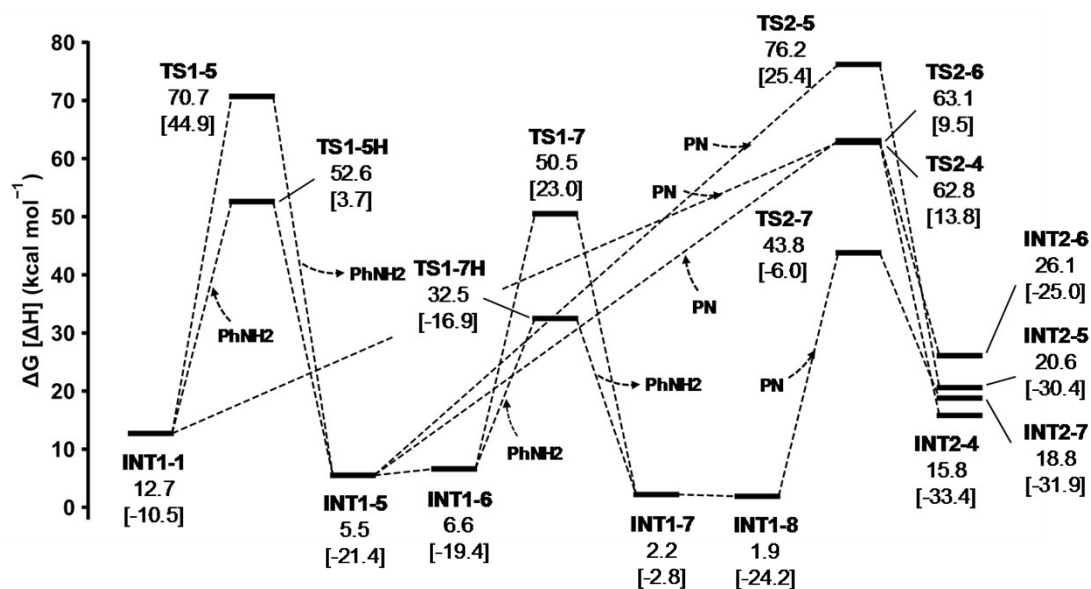

**Figure S10.** Free energy surfaces of the reaction pathways from amidine intermediate INT1-1.  $\Delta G$  presents the relative free energy in the gas phase without correction. Relative enthalpies are given in brackets.



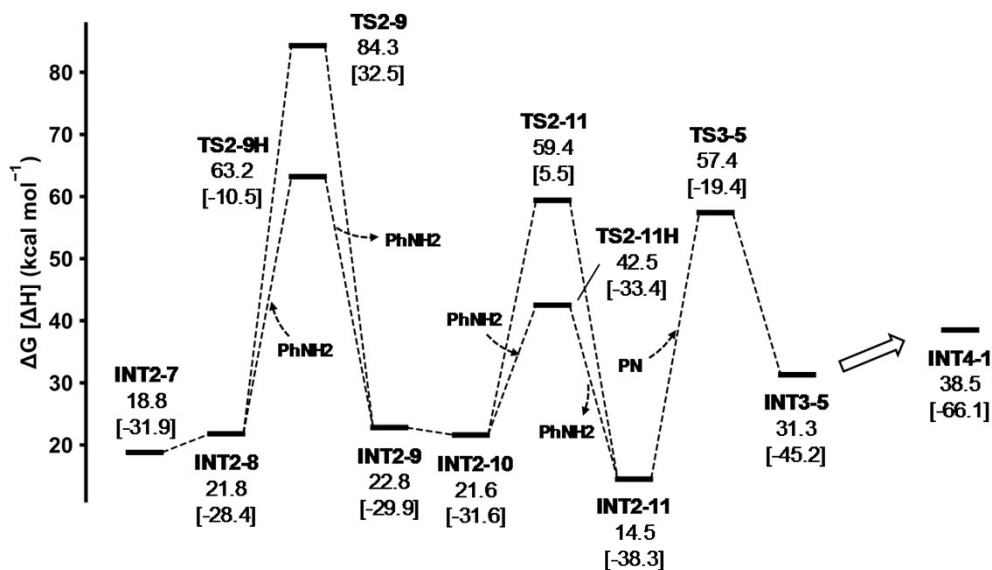

**Figure S11.** Free energy surfaces of the formation of phthalonitrile tetramer **INT4-1** from amidine intermediate **INT2-7**.  $\Delta G$  presents the relative free energy in the gas phase without correction. Relative enthalpies are given in brackets.

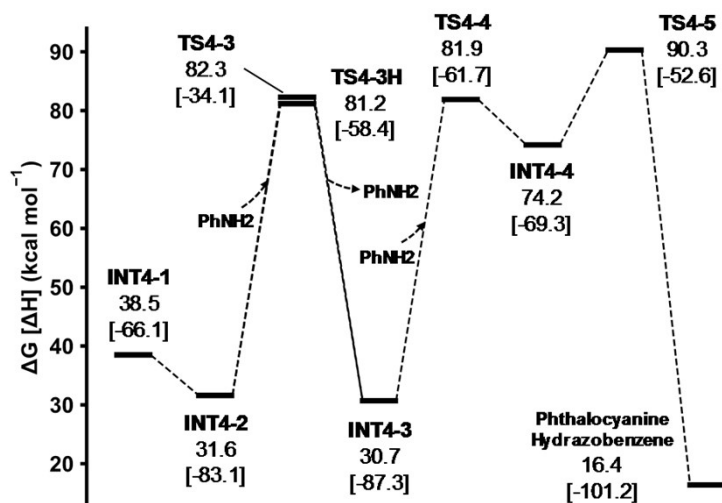

**Figure S12.** Free energy surfaces of the formation of phthalocyanine from amidine intermediate **INT4-1**.  $\Delta G$  presents the relative free energy in the gas phase without correction. Relative enthalpies are given in brackets.

### 3. Cartesian coordinates and associated energies

All calculations were performed using the density functional M06-2X with a D3 dispersion correction. The structures of all reactants, products, intermediates, and transition states were fully optimized with the 6-31G(d,p) basis set in the gas phase. The electronic energies of optimized structures were refined with the larger basis set of 6-311+G(d,p). All thermal dynamic contributions were computed at 260 °C. The Cartesian coordinates of all optimized structures and the associated energies derived from the Gaussian 09 program package are as follows.

#### PN

|   |             |             |             |
|---|-------------|-------------|-------------|
| C | -2.31080500 | -0.69632500 | -0.00000300 |
| C | -2.31079800 | 0.69633700  | 0.00000000  |
| C | -1.10999600 | 1.39695600  | 0.00000600  |
| C | 0.10107300  | 0.70323400  | 0.00000200  |
| C | 0.10106400  | -0.70324700 | -0.00000300 |
| C | -1.11001100 | -1.39695600 | -0.00000200 |
| H | -3.24875200 | -1.24061200 | -0.00000300 |
| H | -3.24874100 | 1.24063100  | 0.00000800  |
| H | -1.09748300 | 2.48085700  | 0.00001500  |
| H | -1.09751200 | -2.48085800 | -0.00001100 |
| C | 1.33865600  | 1.43635700  | 0.00000300  |
| C | 1.33865400  | -1.43636400 | -0.00000300 |
| N | 2.31895900  | 2.05000000  | -0.00000800 |
| N | 2.31896400  | -2.04999600 | 0.00000800  |

E(M06-2X-D3/6-31G(d,p)) = -416.566747994 A.U.

Zero-point correction= 0.098769 (Hartree/Particle)

Thermal correction to Energy= 0.120737

Thermal correction to Enthalpy= 0.122425

Thermal correction to Gibbs Free Energy= 0.028520

E(M06-2X-D3/6-311+G(d,p)) = -416.669600261 A.U.

#### PhNH2

|   |            |            |             |
|---|------------|------------|-------------|
| C | 0.93515300 | 0.00005600 | -0.01031800 |
|---|------------|------------|-------------|

|   |             |             |             |
|---|-------------|-------------|-------------|
| C | 0.22126400  | -1.20490100 | -0.00615000 |
| C | 0.22130800  | 1.20489800  | -0.00613700 |
| C | -1.16799500 | -1.19933800 | 0.00352100  |
| H | 0.76523000  | -2.14574000 | -0.01564900 |
| C | -1.16807200 | 1.19928500  | 0.00354300  |
| H | 0.76510300  | 2.14583100  | -0.01566800 |
| C | -1.87560200 | 0.00002300  | 0.00910700  |
| H | -1.70176400 | -2.14486900 | 0.00823200  |
| H | -1.70171600 | 2.14488800  | 0.00834000  |
| H | -2.95984300 | -0.00007500 | 0.01794600  |
| N | 2.32908100  | -0.00004300 | -0.07625900 |
| H | 2.76658000  | 0.83564500  | 0.28431700  |
| H | 2.76651000  | -0.83551300 | 0.28490200  |

E(M06-2X-D3/6-31G(d,p)) = -287.481263191 A.U.

Zero-point correction= 0.118217 (Hartree/Particle)  
 Thermal correction to Energy= 0.135889  
 Thermal correction to Enthalpy= 0.137578  
 Thermal correction to Gibbs Free Energy= 0.057248

E(M06-2X-D3/6-311+G(d,p)) = -287.553683707 A.U.

### PhNH2-HB

|   |             |             |             |
|---|-------------|-------------|-------------|
| C | -1.57903900 | -0.79740600 | 0.57565600  |
| C | -2.83559200 | -0.78985900 | -0.04031800 |
| C | -0.96861000 | 0.42141500  | 0.89071600  |
| C | -3.46684900 | 0.41374000  | -0.33186700 |
| H | -3.31151800 | -1.73379900 | -0.29353700 |
| C | -1.60339300 | 1.61945700  | 0.58305100  |
| H | 0.01550200  | 0.42670200  | 1.35407800  |
| C | -2.85488000 | 1.62734700  | -0.02705300 |
| H | -4.44372200 | 0.40028900  | -0.80553500 |
| H | -1.10725100 | 2.55444000  | 0.82493800  |
| H | -3.34772600 | 2.56483900  | -0.26015200 |
| C | 1.43198500  | -0.45219000 | -0.97714000 |
| C | 2.11498500  | -1.16029900 | 0.02280900  |
| C | 1.65728200  | 0.92616400  | -1.09277900 |
| C | 2.96448000  | -0.49806000 | 0.90193000  |
| H | 1.96570200  | -2.23393200 | 0.09972500  |
| C | 2.51224400  | 1.57811600  | -0.21384700 |
| H | 1.13216000  | 1.48518500  | -1.86272200 |
| C | 3.16601400  | 0.87675800  | 0.79812100  |

|   |             |             |             |
|---|-------------|-------------|-------------|
| H | 3.47868000  | -1.06412700 | 1.67329800  |
| H | 2.66266800  | 2.64880000  | -0.31616500 |
| H | 3.82856800  | 1.39043400  | 1.48596200  |
| N | 0.56731900  | -1.11974000 | -1.84191300 |
| H | 0.09026600  | -1.88447300 | -1.37516600 |
| H | -0.11023300 | -0.50349800 | -2.27307000 |
| N | -0.91070000 | -2.01371600 | 0.79928200  |
| H | -0.15234300 | -1.93191300 | 1.46482000  |
| H | -1.52885100 | -2.77585500 | 1.04626900  |

E(M06-2X-D3/6-31G(d,p)) = -574.977908081 A.U.

Zero-point correction= 0.238444 (Hartree/Particle)  
 Thermal correction to Energy= 0.277217  
 Thermal correction to Enthalpy= 0.278905  
 Thermal correction to Gibbs Free Energy= 0.146554

E(M06-2X-D3/6-311+G(d,p)) = -575.121827143 A.U.

### TS1-1

|   |             |             |             |
|---|-------------|-------------|-------------|
| C | -1.37524400 | 2.52764000  | -0.31798600 |
| C | -2.63939400 | 2.46180900  | 0.25812000  |
| C | -3.21315100 | 1.22302600  | 0.51684100  |
| C | -2.52986900 | 0.04535300  | 0.19986000  |
| C | -1.25149200 | 0.10515900  | -0.38708400 |
| C | -0.69084500 | 1.35895700  | -0.63503800 |
| H | -0.91606300 | 3.48986600  | -0.51883900 |
| H | -3.17767400 | 3.36921200  | 0.50892800  |
| H | -4.19682100 | 1.14907600  | 0.96759700  |
| H | 0.30036700  | 1.42569100  | -1.07060200 |
| C | -3.19498700 | -1.19667300 | 0.50649800  |
| N | -3.83777500 | -2.10893600 | 0.81110800  |
| C | -0.55732200 | -1.15209900 | -0.73009100 |
| N | -0.78982400 | -2.36316900 | -0.68822300 |
| H | 0.58510100  | -2.17323300 | -1.23958600 |
| N | 0.93908100  | -1.01353300 | -1.31865300 |
| H | 0.98896100  | -0.64040300 | -2.26881500 |
| C | 1.99475300  | -0.50561200 | -0.48116900 |
| C | 2.01805000  | -0.87681700 | 0.86270300  |
| C | 2.97419100  | 0.33497700  | -1.00165400 |
| C | 3.03283400  | -0.39744500 | 1.68199600  |
| H | 1.24684200  | -1.53553500 | 1.25051100  |
| C | 3.98699000  | 0.80958300  | -0.17199200 |

|   |            |             |             |
|---|------------|-------------|-------------|
| H | 2.94704000 | 0.61626800  | -2.05159200 |
| C | 4.01776900 | 0.44574700  | 1.17014300  |
| H | 3.05335600 | -0.68560600 | 2.72772600  |
| H | 4.74940300 | 1.46561700  | -0.57868300 |
| H | 4.80541500 | 0.81687400  | 1.81685300  |

E(M06-2X-D3/6-31G(d,p)) = -703.972803193 A.U.

|                                          |                             |
|------------------------------------------|-----------------------------|
| Zero-point correction=                   | 0.215651 (Hartree/Particle) |
| Thermal correction to Energy=            | 0.256198                    |
| Thermal correction to Enthalpy=          | 0.257886                    |
| Thermal correction to Gibbs Free Energy= | 0.120186                    |

E(M06-2X-D3/6-311+G(d,p)) = -704.142203359 A.U.

### TS1-1H

|   |             |             |             |
|---|-------------|-------------|-------------|
| C | 3.00603300  | 2.84535500  | -0.88465000 |
| C | 2.34945700  | 4.06887200  | -0.78393600 |
| C | 1.07071500  | 4.12109100  | -0.24341500 |
| C | 0.45506400  | 2.95138600  | 0.21102300  |
| C | 1.11316400  | 1.71204300  | 0.12038300  |
| C | 2.38860200  | 1.67800400  | -0.44491800 |
| H | 4.00538600  | 2.79765400  | -1.30518000 |
| H | 2.82742800  | 4.97897100  | -1.12980400 |
| H | 0.53491900  | 5.06159000  | -0.17330800 |
| H | 2.91089600  | 0.72855600  | -0.51732900 |
| C | -0.89600700 | 3.04659900  | 0.70689400  |
| N | -1.99659600 | 3.19721000  | 1.03265400  |
| C | 0.44832300  | 0.49553600  | 0.67053500  |
| N | -0.18729700 | 0.32939000  | 1.69835000  |
| H | -0.49489800 | -1.39907700 | -0.06313100 |
| N | 0.62369200  | -0.73692500 | -0.42051900 |
| H | 0.61997600  | -0.37746600 | -1.37401400 |
| N | -1.43380000 | -1.74562400 | 0.66977000  |
| H | -1.06426500 | -1.05401700 | 1.42675200  |
| H | -1.39110000 | -2.72096200 | 0.95175300  |
| C | -2.72426900 | -1.35387200 | 0.17053800  |
| C | -3.52261700 | -2.26525200 | -0.51620900 |
| C | -3.13739400 | -0.03315200 | 0.33963200  |
| C | -4.74626400 | -1.85187300 | -1.03429800 |
| H | -3.18694500 | -3.29093500 | -0.64516100 |
| C | -4.35802700 | 0.37041800  | -0.19125300 |
| H | -2.51484200 | 0.66681500  | 0.88902200  |

|   |             |             |             |
|---|-------------|-------------|-------------|
| C | -5.16528600 | -0.53314400 | -0.87796700 |
| H | -5.37064000 | -2.56407200 | -1.56417100 |
| H | -4.67068700 | 1.40086100  | -0.05634900 |
| H | -6.11810700 | -0.21300200 | -1.28623500 |
| C | 1.73999800  | -1.59843700 | -0.21193200 |
| C | 2.56915900  | -1.97330100 | -1.27305700 |
| C | 1.98901800  | -2.10094100 | 1.06966600  |
| C | 3.63261100  | -2.84292900 | -1.05576100 |
| H | 2.37659200  | -1.58061500 | -2.26867300 |
| C | 3.05718300  | -2.96750400 | 1.27496100  |
| H | 1.36150200  | -1.78127000 | 1.89600400  |
| C | 3.88172500  | -3.34609800 | 0.21818700  |
| H | 4.26820600  | -3.12610700 | -1.88874400 |
| H | 3.24642900  | -3.34758900 | 2.27392600  |
| H | 4.71103400  | -4.02449400 | 0.38632400  |

E(M06-2X-D3/6-31G(d,p)) = -991.501505500 A.U.

Zero-point correction= 0.335506 (Hartree/Particle)

Thermal correction to Energy= 0.395944

Thermal correction to Enthalpy= 0.397632

Thermal correction to Gibbs Free Energy= 0.213072

E(M06-2X-D3/6-311+G(d,p)) = -991.740029372 A.U.

### INT1-1

|   |             |             |             |
|---|-------------|-------------|-------------|
| C | -3.09871100 | -2.18703500 | 0.23063500  |
| C | -4.18615900 | -1.35603100 | -0.01754600 |
| C | -3.98768400 | 0.00924800  | -0.18471900 |
| C | -2.70215800 | 0.55274300  | -0.09716400 |
| C | -1.60014200 | -0.28150400 | 0.15494400  |
| C | -1.81710600 | -1.65054500 | 0.31057900  |
| H | -3.24667200 | -3.25292200 | 0.36915600  |
| H | -5.18763000 | -1.76716400 | -0.08391700 |
| H | -4.82264900 | 0.67000800  | -0.39061500 |
| H | -0.96940100 | -2.29303600 | 0.52654500  |
| C | -2.57059600 | 1.97024000  | -0.33061100 |
| N | -2.58480500 | 3.09997700  | -0.57872100 |
| C | -0.22257400 | 0.28346000  | 0.28679600  |
| N | -0.07506200 | 1.40012400  | 0.87588600  |
| H | 0.89735800  | 1.71089100  | 0.85959600  |
| N | 0.76155300  | -0.55034500 | -0.24879700 |
| H | 0.46119500  | -1.12128000 | -1.02666200 |

|   |            |             |             |
|---|------------|-------------|-------------|
| C | 2.14719700 | -0.31895200 | -0.15905400 |
| C | 2.73337400 | 0.04841000  | 1.05724600  |
| C | 2.95583800 | -0.51584300 | -1.28093800 |
| C | 4.10916300 | 0.23358800  | 1.13376800  |
| H | 2.11151000 | 0.16262100  | 1.93927500  |
| C | 4.33257100 | -0.34844900 | -1.18778900 |
| H | 2.49914900 | -0.79499200 | -2.22658300 |
| C | 4.91591500 | 0.03569700  | 0.01635900  |
| H | 4.55326700 | 0.52085400  | 2.08144600  |
| H | 4.94936200 | -0.50958300 | -2.06611600 |
| H | 5.98913300 | 0.17614700  | 0.08425200  |

E(M06-2X-D3/6-31G(d,p)) = -704.073838661 A.U.

|                                          |                             |
|------------------------------------------|-----------------------------|
| Zero-point correction=                   | 0.221656 (Hartree/Particle) |
| Thermal correction to Energy=            | 0.262468                    |
| Thermal correction to Enthalpy=          | 0.264157                    |
| Thermal correction to Gibbs Free Energy= | 0.126848                    |

E(M06-2X-D3/6-311+G(d,p)) = -704.244098173 A.U.

### TS1-2

|   |             |             |             |
|---|-------------|-------------|-------------|
| C | 3.30228800  | -0.90965100 | -1.24981900 |
| C | 3.40653200  | 0.45041900  | -1.54171700 |
| C | 2.58643300  | 1.35853500  | -0.88956700 |
| C | 1.64887600  | 0.90468300  | 0.04692400  |
| C | 1.52313200  | -0.46553400 | 0.33382400  |
| C | 2.37315300  | -1.35928100 | -0.32130300 |
| H | 3.94956400  | -1.62245700 | -1.75018400 |
| H | 4.12991800  | 0.80305600  | -2.26861100 |
| H | 2.66442800  | 2.42204900  | -1.08691400 |
| H | 2.27979300  | -2.41064700 | -0.06974300 |
| C | 0.86331400  | 1.88416400  | 0.74850700  |
| N | 0.24124500  | 2.66638100  | 1.33463000  |
| C | 0.57754700  | -1.05574700 | 1.31503800  |
| N | 0.56128700  | -2.12411600 | 1.94509800  |
| H | -0.72269300 | -1.37709900 | 2.21564600  |
| N | -0.78946900 | -0.33666400 | 1.59911100  |
| H | -0.72813600 | 0.52669300  | 2.14316800  |
| C | -1.72240400 | -0.20841400 | 0.50243500  |
| C | -1.91793700 | -1.30401600 | -0.33739000 |
| C | -2.42361200 | 0.97648500  | 0.30542800  |
| C | -2.82973100 | -1.20488300 | -1.38126500 |

|   |             |             |             |
|---|-------------|-------------|-------------|
| H | -1.36085400 | -2.21973600 | -0.16270400 |
| C | -3.33638100 | 1.06270500  | -0.74279600 |
| H | -2.24403700 | 1.82732500  | 0.95583100  |
| C | -3.54092400 | -0.02399000 | -1.58660700 |
| H | -2.98702000 | -2.05576800 | -2.03582800 |
| H | -3.88278500 | 1.98678500  | -0.89934300 |
| H | -4.25132800 | 0.04773800  | -2.40334000 |

E(M06-2X-D3/6-31G(d,p)) = -703.981683430 A.U.

Zero-point correction= 0.216003 (Hartree/Particle)  
 Thermal correction to Energy= 0.256241  
 Thermal correction to Enthalpy= 0.257930  
 Thermal correction to Gibbs Free Energy= 0.122193

E(M06-2X-D3/6-311+G(d,p)) = -704.151238340 A.U.

### TS1-2H

|   |             |             |             |
|---|-------------|-------------|-------------|
| C | 3.85791800  | -2.10074300 | -1.40937300 |
| C | 4.40578200  | -2.20163800 | -0.13080700 |
| C | 3.63297400  | -1.87321500 | 0.97179600  |
| C | 2.31740100  | -1.42299600 | 0.79571400  |
| C | 1.75955500  | -1.29939400 | -0.48888400 |
| C | 2.55151500  | -1.66351900 | -1.58048200 |
| H | 4.45370700  | -2.36551300 | -2.27689100 |
| H | 5.42576400  | -2.54369400 | 0.00594100  |
| H | 4.02921000  | -1.96623000 | 1.97710800  |
| H | 2.10057100  | -1.59587600 | -2.56479200 |
| C | 1.54661400  | -1.14292600 | 1.97735600  |
| N | 0.92090000  | -0.91839400 | 2.92679800  |
| C | 0.35897400  | -0.85779800 | -0.80072600 |
| N | -0.35661900 | -1.25093200 | -1.71913500 |
| H | -1.21116500 | 0.62769300  | -0.43514800 |
| N | -0.11624300 | 0.35769000  | 0.14370700  |
| H | -0.30153800 | 0.04366000  | 1.09684800  |
| N | -2.21956700 | 0.49101100  | -1.26133800 |
| H | -1.58532800 | -0.34996300 | -1.69473100 |
| H | -2.38346900 | 1.25966200  | -1.90413200 |
| C | -3.40005700 | 0.04798000  | -0.60777700 |
| C | -3.35783500 | -1.14979500 | 0.11230900  |
| C | -4.57756900 | 0.79552400  | -0.63873400 |
| C | -4.48741500 | -1.58482600 | 0.79565100  |
| H | -2.44450800 | -1.73870600 | 0.11104700  |



|   |             |             |             |
|---|-------------|-------------|-------------|
| C | -5.70324700 | 0.34962500  | 0.04596400  |
| H | -4.60829900 | 1.72644300  | -1.19874500 |
| C | -5.66415300 | -0.83937800 | 0.76819300  |
| H | -4.44726200 | -2.51669500 | 1.35059200  |
| H | -6.61476400 | 0.93807200  | 0.01456900  |
| H | -6.54279200 | -1.18334100 | 1.30310700  |
| C | 0.76766700  | 1.48669500  | 0.14735400  |
| C | 1.23604900  | 1.97186000  | -1.07487800 |
| C | 1.13311500  | 2.11206100  | 1.33848900  |
| C | 2.06718800  | 3.08619300  | -1.09969700 |
| H | 0.95300900  | 1.46432500  | -1.99325000 |
| C | 1.96343200  | 3.22808000  | 1.30115700  |
| H | 0.77500600  | 1.71844000  | 2.28545000  |
| C | 2.43276800  | 3.71908400  | 0.08585100  |
| H | 2.43157500  | 3.45975500  | -2.05119400 |
| H | 2.24564300  | 3.71286100  | 2.23009700  |
| H | 3.08129300  | 4.58823900  | 0.06304400  |

E(M06-2X-D3/6-31G(d,p)) = -991.507184657 A.U.

|                                          |                             |
|------------------------------------------|-----------------------------|
| Zero-point correction=                   | 0.335289 (Hartree/Particle) |
| Thermal correction to Energy=            | 0.395333                    |
| Thermal correction to Enthalpy=          | 0.397022                    |
| Thermal correction to Gibbs Free Energy= | 0.215322                    |

E(M06-2X-D3/6-311+G(d,p)) = -991.745284288 A.U.

## INT1-2

|   |             |             |             |
|---|-------------|-------------|-------------|
| C | 4.06527900  | -1.22085500 | -0.35997200 |
| C | 4.51916600  | 0.08132200  | -0.16084500 |
| C | 3.60729900  | 1.09122200  | 0.10453600  |
| C | 2.23551200  | 0.80760900  | 0.16240200  |
| C | 1.76844000  | -0.50254600 | -0.04792800 |
| C | 2.70742700  | -1.50478000 | -0.29996200 |
| H | 4.77275300  | -2.01835700 | -0.56173400 |
| H | 5.57870400  | 0.30859500  | -0.20603100 |
| H | 3.93925800  | 2.10886900  | 0.27881700  |
| H | 2.33396900  | -2.51292400 | -0.43760400 |
| C | 1.36880900  | 1.91827900  | 0.47115900  |
| N | 0.72457900  | 2.85292400  | 0.69888700  |
| C | 0.32649900  | -0.91793500 | 0.00875200  |
| N | 0.07657900  | -2.11310400 | 0.38208600  |
| H | -0.92093600 | -2.31752700 | 0.31745200  |

|   |             |             |             |
|---|-------------|-------------|-------------|
| N | -0.58162300 | 0.04952200  | -0.37907800 |
| H | -0.23307000 | 0.83666400  | -0.90528100 |
| C | -1.97892300 | -0.01071200 | -0.22213000 |
| C | -2.56183300 | -0.56514900 | 0.92247800  |
| C | -2.79509100 | 0.54802700  | -1.20895500 |
| C | -3.94578700 | -0.57460000 | 1.05692500  |
| H | -1.92969000 | -0.95818300 | 1.71166700  |
| C | -4.17601700 | 0.55077800  | -1.05438300 |
| H | -2.33961300 | 0.97801200  | -2.09637400 |
| C | -4.75986000 | -0.01952700 | 0.07355100  |
| H | -4.38753600 | -1.00586700 | 1.94943000  |
| H | -4.79785400 | 0.99364100  | -1.82569600 |
| H | -5.83825300 | -0.02512200 | 0.18832000  |

E(M06-2X-D3/6-31G(d,p)) = -704.076238898 A.U.

|                                          |                             |
|------------------------------------------|-----------------------------|
| Zero-point correction=                   | 0.221732 (Hartree/Particle) |
| Thermal correction to Energy=            | 0.262572                    |
| Thermal correction to Enthalpy=          | 0.264260                    |
| Thermal correction to Gibbs Free Energy= | 0.126183                    |

E(M06-2X-D3/6-311+G(d,p)) = -704.246370584 A.U.

### TS2-1

|   |             |             |             |
|---|-------------|-------------|-------------|
| C | 2.60411000  | 1.71093400  | -1.74362900 |
| C | 2.65934200  | 2.84194300  | -0.93321400 |
| C | 1.61021400  | 3.13280900  | -0.06955500 |
| C | 0.50234500  | 2.28330800  | -0.00566700 |
| C | 0.45539100  | 1.12487500  | -0.80226200 |
| C | 1.50909800  | 0.85647400  | -1.67525600 |
| H | 3.41781100  | 1.48675700  | -2.42470500 |
| H | 3.51864500  | 3.50215600  | -0.97538700 |
| H | 1.63660300  | 4.01250300  | 0.56352600  |
| H | 1.46624800  | -0.03289400 | -2.29625800 |
| C | -0.57524600 | 2.62252500  | 0.88960300  |
| N | -1.44558500 | 2.94520500  | 1.58036000  |
| C | -0.67801600 | 0.16723300  | -0.70779500 |
| N | -0.50282600 | -1.10517100 | -0.50000800 |
| N | -1.92271500 | 0.67808800  | -0.85658300 |
| H | -1.99174300 | 1.64959600  | -1.12388500 |
| C | 0.69393600  | -1.99139900 | -0.63773900 |
| N | 0.31425900  | -2.99020300 | -1.28130700 |
| H | -0.92528500 | -2.08130800 | -1.04339800 |

|   |             |             |             |
|---|-------------|-------------|-------------|
| C | 2.01116500  | -1.65822200 | -0.03909200 |
| C | 3.14862600  | -2.14353900 | -0.68742600 |
| C | 2.18141900  | -0.91462400 | 1.14163100  |
| C | 4.41945600  | -1.86461400 | -0.20229600 |
| H | 2.99586700  | -2.74585900 | -1.57752600 |
| C | 3.46321700  | -0.63496200 | 1.63152000  |
| C | 4.58056700  | -1.10070000 | 0.95402000  |
| H | 5.29085600  | -2.24488900 | -0.72580100 |
| H | 3.56454900  | -0.06094600 | 2.54636400  |
| H | 5.57272400  | -0.88039400 | 1.33278100  |
| C | 1.04743800  | -0.44314300 | 1.89289600  |
| N | 0.14291400  | -0.05843100 | 2.50556100  |
| C | -3.12003300 | 0.03816800  | -0.41761200 |
| C | -4.23197500 | 0.03714900  | -1.25377000 |
| C | -3.17868100 | -0.52513100 | 0.85773300  |
| C | -5.42240100 | -0.53155600 | -0.80929600 |
| H | -4.15746500 | 0.47443400  | -2.24473300 |
| C | -4.36707800 | -1.10539600 | 1.28231400  |
| H | -2.30387200 | -0.49345300 | 1.50130700  |
| C | -5.48928400 | -1.10865100 | 0.45447100  |
| H | -6.29294200 | -0.53056600 | -1.45664400 |
| H | -4.42082500 | -1.54423400 | 2.27296800  |
| H | -6.41514600 | -1.55819300 | 0.79775900  |

E(M06-2X-D3/6-31G(d,p)) = -1120.57786890 A.U.

Zero-point correction= 0.318397 (Hartree/Particle)  
 Thermal correction to Energy= 0.382923  
 Thermal correction to Enthalpy= 0.384611  
 Thermal correction to Gibbs Free Energy= 0.193474

E(M06-2X-D3/6-311+G(d,p)) = -1120.84782782 A.U.

### INT2-1

|   |             |            |             |
|---|-------------|------------|-------------|
| C | -2.50773900 | 2.72610400 | 1.18328300  |
| C | -3.03045400 | 2.86190100 | -0.10078600 |
| C | -2.38130800 | 2.27788400 | -1.18077800 |
| C | -1.19977300 | 1.55745300 | -0.97752900 |
| C | -0.67304000 | 1.41160700 | 0.31569600  |
| C | -1.33999300 | 1.99954900 | 1.38964700  |
| H | -3.01406400 | 3.18134600 | 2.02777400  |
| H | -3.94739300 | 3.41824500 | -0.26182200 |
| H | -2.78179900 | 2.36366600 | -2.18478200 |

|   |             |             |             |
|---|-------------|-------------|-------------|
| H | -0.94250700 | 1.86542300  | 2.39053500  |
| C | -0.56836200 | 0.92959400  | -2.11038400 |
| N | -0.08736900 | 0.43365600  | -3.03888500 |
| C | 0.54078900  | 0.56981300  | 0.59578400  |
| N | 0.51853700  | -0.46601600 | 1.35960100  |
| N | 1.67665200  | 1.03530400  | 0.01509800  |
| H | 1.58443200  | 1.91542200  | -0.47103800 |
| C | -0.70825700 | -0.96958500 | 1.81149400  |
| N | -0.99114300 | -1.17360800 | 3.03628200  |
| H | -0.19639000 | -0.87506000 | 3.60771900  |
| C | -1.73497600 | -1.32268400 | 0.77564300  |
| C | -3.07676100 | -1.06317100 | 1.05608000  |
| C | -1.40034200 | -1.84750100 | -0.48412200 |
| C | -4.06038200 | -1.28143400 | 0.09881200  |
| H | -3.32231900 | -0.67343200 | 2.03820700  |
| C | -2.39319200 | -2.07073600 | -1.44635900 |
| C | -3.71856300 | -1.77586100 | -1.15878700 |
| H | -5.09666400 | -1.05856900 | 0.33178000  |
| H | -2.10499400 | -2.46939100 | -2.41292100 |
| H | -4.48261600 | -1.93816700 | -1.91129100 |
| C | -0.05012200 | -2.21769500 | -0.82979500 |
| N | 1.00706300  | -2.56005200 | -1.15346200 |
| C | 2.98976600  | 0.51638600  | 0.05532900  |
| C | 4.01236200  | 1.38197300  | -0.34684400 |
| C | 3.29292700  | -0.79030500 | 0.44454100  |
| C | 5.33070600  | 0.95003700  | -0.36027300 |
| H | 3.76861800  | 2.39745400  | -0.64977900 |
| C | 4.62143700  | -1.20527300 | 0.42903700  |
| H | 2.50317400  | -1.46795100 | 0.73270400  |
| C | 5.64337500  | -0.34833800 | 0.03394300  |
| H | 6.11314700  | 1.63147000  | -0.67794200 |
| H | 4.85167400  | -2.22406100 | 0.72310300  |
| H | 6.67293100  | -0.68969000 | 0.02551300  |

E(M06-2X-D3/6-31G(d,p)) = -1120.67266082 A.U.

Zero-point correction= 0.324485 (Hartree/Particle)  
 Thermal correction to Energy= 0.389121  
 Thermal correction to Enthalpy= 0.390810  
 Thermal correction to Gibbs Free Energy= 0.198947

E(M06-2X-D3/6-311+G(d,p)) = -1120.94291086 A.U.

**TS1-3**

|   |             |             |             |
|---|-------------|-------------|-------------|
| C | -4.09061100 | -1.17899300 | 0.30946700  |
| C | -4.51296400 | 0.14457000  | 0.19859700  |
| C | -3.57864700 | 1.14507600  | -0.01979800 |
| C | -2.21614900 | 0.82754600  | -0.11300400 |
| C | -1.77851900 | -0.50469300 | 0.00242500  |
| C | -2.74226200 | -1.49334800 | 0.20102600  |
| H | -4.81651900 | -1.96810200 | 0.47610900  |
| H | -5.56543300 | 0.39501000  | 0.27482400  |
| H | -3.88614100 | 2.17957200  | -0.12750500 |
| H | -2.39688600 | -2.51995400 | 0.25925400  |
| C | -1.31151600 | 1.92438900  | -0.35396600 |
| N | -0.60807100 | 2.82990800  | -0.51606200 |
| C | -0.33589100 | -0.97503800 | -0.15060000 |
| N | -0.07579100 | -2.07415700 | -0.66935500 |
| H | 0.14275700  | -2.75528900 | -1.35318500 |
| N | 0.57868400  | -0.10278900 | 0.41195000  |
| H | 0.21188200  | 0.72654600  | 0.85367700  |
| C | 1.97675800  | -0.09203900 | 0.24595100  |
| C | 2.73307800  | -1.24948500 | 0.04162300  |
| C | 2.61804000  | 1.14996600  | 0.32544500  |
| C | 4.11506900  | -1.14674900 | -0.09294900 |
| H | 2.23896200  | -2.20914100 | -0.00139500 |
| C | 3.99754800  | 1.23432800  | 0.20044100  |
| H | 2.02101800  | 2.04840400  | 0.46202600  |
| C | 4.75567900  | 0.08548100  | -0.01475500 |
| H | 4.69597800  | -2.05008000 | -0.25211700 |
| H | 4.47948700  | 2.20484300  | 0.26213700  |
| H | 5.83347000  | 0.15140100  | -0.11899000 |

E(M06-2X-D3/6-31G(d,p)) = -704.036846555 A.U.

Zero-point correction= 0.218769 (Hartree/Particle)

Thermal correction to Energy= 0.260027

Thermal correction to Enthalpy= 0.261715

Thermal correction to Gibbs Free Energy= 0.122602

E(M06-2X-D3/6-311+G(d,p)) = -704.208340361 A.U.

**INT1-3**

|   |             |             |             |
|---|-------------|-------------|-------------|
| C | -4.06115800 | -1.13739200 | 0.51781500  |
| C | -4.48566700 | 0.17228300  | 0.30857500  |
| C | -3.56379800 | 1.14491600  | -0.05151900 |

|   |             |             |             |
|---|-------------|-------------|-------------|
| C | -2.21221300 | 0.81145900  | -0.20064500 |
| C | -1.77438800 | -0.50973300 | 0.00258800  |
| C | -2.72051000 | -1.47042300 | 0.36156400  |
| H | -4.77454100 | -1.90138300 | 0.80856400  |
| H | -5.53085100 | 0.43610600  | 0.42666500  |
| H | -3.87492800 | 2.16916400  | -0.22571800 |
| H | -2.38493500 | -2.48808900 | 0.53567000  |
| C | -1.30455600 | 1.86889900  | -0.57151100 |
| N | -0.60326900 | 2.75134200  | -0.83485400 |
| C | -0.34877000 | -0.95304000 | -0.18651500 |
| N | -0.02655500 | -2.02442900 | -0.80727200 |
| H | -0.85897600 | -2.45544300 | -1.20395800 |
| N | 0.57464900  | -0.12177900 | 0.39309500  |
| H | 0.20637900  | 0.67699500  | 0.88595000  |
| C | 1.97450100  | -0.10947500 | 0.25100700  |
| C | 2.71707200  | -1.19082400 | -0.23241200 |
| C | 2.63015400  | 1.06547400  | 0.64076600  |
| C | 4.10262900  | -1.07480000 | -0.31783300 |
| H | 2.20792400  | -2.09319400 | -0.53783600 |
| C | 4.01093300  | 1.15977800  | 0.55477700  |
| H | 2.04501300  | 1.91242200  | 0.99120200  |
| C | 4.75846200  | 0.08717100  | 0.07317400  |
| H | 4.67416700  | -1.91714100 | -0.69533700 |
| H | 4.50236500  | 2.07901100  | 0.85712500  |
| H | 5.83845900  | 0.15983400  | 0.00189900  |

E(M06-2X-D3/6-31G(d,p)) = -704.076719978 A.U.

Zero-point correction= 0.221872 (Hartree/Particle)  
 Thermal correction to Energy= 0.262690  
 Thermal correction to Enthalpy= 0.264378  
 Thermal correction to Gibbs Free Energy= 0.127081

E(M06-2X-D3/6-311+G(d,p)) = -704.246915145 A.U.

#### INT1-4

|   |            |             |             |
|---|------------|-------------|-------------|
| C | 3.08636000 | -1.17588300 | 0.96838300  |
| C | 2.92956700 | -1.88830500 | -0.21730800 |
| C | 2.04308100 | -1.43339900 | -1.18531800 |
| C | 1.29794500 | -0.27106300 | -0.96400000 |
| C | 1.44345900 | 0.44715700  | 0.23506200  |
| C | 2.35229200 | -0.01425200 | 1.18613700  |
| H | 3.77892600 | -1.52614500 | 1.72653300  |

|   |             |             |             |
|---|-------------|-------------|-------------|
| H | 3.49870500  | -2.79481400 | -0.39187800 |
| H | 1.92012700  | -1.96659100 | -2.12156100 |
| H | 2.46203200  | 0.54225300  | 2.11245200  |
| C | 0.41965800  | 0.17739100  | -2.01532500 |
| N | -0.25693300 | 0.50181800  | -2.89611900 |
| C | 0.70428400  | 1.72566100  | 0.49554500  |
| N | 1.26810900  | 2.81429600  | 0.85729700  |
| H | 2.27993200  | 2.69558600  | 0.86895000  |
| N | -0.65029000 | 1.71693900  | 0.25106900  |
| H | -1.05739100 | 2.64199000  | 0.21368300  |
| C | -1.52896100 | 0.61896900  | 0.36696800  |
| C | -1.32498600 | -0.38803000 | 1.31367200  |
| C | -2.63731500 | 0.55562400  | -0.48155900 |
| C | -2.21336700 | -1.45592100 | 1.39257600  |
| H | -0.48137700 | -0.32481100 | 1.99340200  |
| C | -3.53366800 | -0.50027700 | -0.37687300 |
| H | -2.76817400 | 1.32433700  | -1.23665500 |
| C | -3.32243700 | -1.51508800 | 0.55437200  |
| H | -2.04522300 | -2.23462300 | 2.12961700  |
| H | -4.39122400 | -0.53973200 | -1.04052200 |
| H | -4.01801900 | -2.34432100 | 0.62627000  |

E(M06-2X-D3/6-31G(d,p)) = -704.075655091 A.U.

|                                          |                             |
|------------------------------------------|-----------------------------|
| Zero-point correction=                   | 0.221751 (Hartree/Particle) |
| Thermal correction to Energy=            | 0.262601                    |
| Thermal correction to Enthalpy=          | 0.264290                    |
| Thermal correction to Gibbs Free Energy= | 0.127846                    |

E(M06-2X-D3/6-311+G(d,p)) = -704.247322697 A.U.

### TS2-2

|   |             |            |             |
|---|-------------|------------|-------------|
| C | -1.51474900 | 3.55778500 | -0.41361700 |
| C | -2.57064400 | 3.65473000 | 0.48828500  |
| C | -2.89258700 | 2.57522000 | 1.30283900  |
| C | -2.16824100 | 1.38472800 | 1.20276000  |
| C | -1.11314400 | 1.28017500 | 0.28112200  |
| C | -0.78173600 | 2.37815900 | -0.51189800 |
| H | -1.25650000 | 4.40212300 | -1.04360700 |
| H | -3.14018800 | 4.57449100 | 0.56571000  |
| H | -3.69869900 | 2.64341400 | 2.02477100  |
| H | 0.04655400  | 2.29776000 | -1.21239700 |
| C | -2.49640300 | 0.29820200 | 2.08937000  |

|   |             |             |             |
|---|-------------|-------------|-------------|
| N | -2.76736800 | -0.55105300 | 2.82687400  |
| C | -0.28816200 | 0.03893200  | 0.15950300  |
| N | 1.00857400  | 0.12726900  | 0.29310400  |
| H | 1.34474700  | 1.04680200  | 0.55697200  |
| N | -0.85318100 | -1.14879300 | -0.06529100 |
| C | -2.18336900 | -1.39680200 | -0.48281200 |
| C | -2.79517400 | -0.63853900 | -1.48185200 |
| C | -2.86482600 | -2.46372300 | 0.10445400  |
| C | -4.09829700 | -0.93531400 | -1.86899300 |
| H | -2.24717700 | 0.16720600  | -1.95976000 |
| C | -4.15883500 | -2.76324600 | -0.30171000 |
| H | -2.37803900 | -3.02865000 | 0.89264300  |
| C | -4.78246900 | -1.99689400 | -1.28375100 |
| H | -4.57197800 | -0.34297800 | -2.64511200 |
| H | -4.68556600 | -3.59067400 | 0.16179400  |
| H | -5.79574900 | -2.22898100 | -1.59413500 |
| H | -0.14205900 | -1.92948500 | -0.03761000 |
| C | 2.03088200  | -1.31102700 | 0.08316400  |
| C | 3.42283400  | -0.80856000 | 0.12260700  |
| C | 4.34546700  | -1.60010200 | 0.81082900  |
| C | 3.89114500  | 0.34306600  | -0.53342600 |
| C | 5.68683500  | -1.24699900 | 0.87370000  |
| H | 3.97671200  | -2.50104700 | 1.28875200  |
| C | 5.24738700  | 0.69336000  | -0.47495100 |
| C | 6.14139600  | -0.09549700 | 0.23278300  |
| H | 6.38146900  | -1.87366900 | 1.42337700  |
| H | 5.58318800  | 1.58230500  | -0.99796500 |
| H | 7.18873600  | 0.18230500  | 0.27738300  |
| N | 1.50034300  | -2.38296600 | -0.00223100 |
| C | 3.02995900  | 1.19309600  | -1.31522100 |
| N | 2.37891000  | 1.92048300  | -1.93815800 |

E(M06-2X-D3/6-31G(d,p)) = -1120.62712030 A.U.

Zero-point correction= 0.321105 (Hartree/Particle)  
 Thermal correction to Energy= 0.385290  
 Thermal correction to Enthalpy= 0.386979  
 Thermal correction to Gibbs Free Energy= 0.195530

E(M06-2X-D3/6-311+G(d,p)) = -1120.89734054 A.U.

## INT2-2

|   |             |            |             |
|---|-------------|------------|-------------|
| C | -1.30053100 | 3.44354000 | -0.43377400 |
|---|-------------|------------|-------------|



|   |             |             |             |
|---|-------------|-------------|-------------|
| C | -2.23895800 | 3.62057000  | 0.57874900  |
| C | -2.56318900 | 2.56228700  | 1.41969700  |
| C | -1.95857000 | 1.31622700  | 1.23601600  |
| C | -1.02923400 | 1.12737700  | 0.19998500  |
| C | -0.69350200 | 2.20375400  | -0.61916000 |
| H | -1.03474800 | 4.27096100  | -1.08282300 |
| H | -2.71234500 | 4.58573400  | 0.72243800  |
| H | -3.27717600 | 2.68966200  | 2.22563200  |
| H | 0.04470200  | 2.06912500  | -1.40434700 |
| C | -2.26290800 | 0.25141100  | 2.15666200  |
| N | -2.49837400 | -0.57811700 | 2.92813300  |
| C | -0.38147700 | -0.20916100 | -0.02142900 |
| N | 0.99710600  | -0.15202300 | 0.09002400  |
| H | 1.36669400  | 0.73258000  | 0.40629600  |
| N | -0.97803100 | -1.30789500 | -0.27958100 |
| C | -2.36427500 | -1.35349200 | -0.54092400 |
| C | -2.95791600 | -0.56844200 | -1.53437600 |
| C | -3.14164400 | -2.27762500 | 0.16319900  |
| C | -4.31801900 | -0.69246700 | -1.79971800 |
| H | -2.34449300 | 0.12278700  | -2.10445700 |
| C | -4.50148300 | -2.38483300 | -0.09807900 |
| H | -2.66659800 | -2.88015900 | 0.93006800  |
| C | -5.09588800 | -1.59501000 | -1.08034600 |
| H | -4.76840100 | -0.08211400 | -2.57623600 |
| H | -5.09952100 | -3.09186900 | 0.46771900  |
| H | -6.15671500 | -1.68797800 | -1.28798500 |
| H | 0.62821900  | -2.56024900 | -0.37591200 |
| C | 1.90736100  | -1.20253700 | -0.10409700 |
| C | 3.35079200  | -0.80887400 | 0.02583300  |
| C | 4.21098100  | -1.74578500 | 0.60066500  |
| C | 3.89812700  | 0.40655100  | -0.42312800 |
| C | 5.56564200  | -1.47915800 | 0.75017500  |
| H | 3.78381900  | -2.69032100 | 0.91791200  |
| C | 5.26646500  | 0.67297400  | -0.27614100 |
| C | 6.09670000  | -0.26571500 | 0.31651000  |
| H | 6.21167800  | -2.22165400 | 1.20683400  |
| H | 5.66084400  | 1.61495800  | -0.64103400 |
| H | 7.15420700  | -0.05514200 | 0.43242600  |
| N | 1.63961400  | -2.41937300 | -0.34007800 |
| C | 3.10742200  | 1.41389500  | -1.08372400 |
| N | 2.50174900  | 2.25323100  | -1.60308500 |

E(M06-2X-D3/6-31G(d,p)) = -1120.67686213 A.U.

|                                          |                             |
|------------------------------------------|-----------------------------|
| Zero-point correction=                   | 0.324752 (Hartree/Particle) |
| Thermal correction to Energy=            | 0.389230                    |
| Thermal correction to Enthalpy=          | 0.390918                    |
| Thermal correction to Gibbs Free Energy= | 0.198695                    |

E(M06-2X-D3/6-311+G(d,p)) = -1120.94573461 A.U.

### INT2-3

|   |             |             |             |
|---|-------------|-------------|-------------|
| C | 3.11547300  | -2.37153300 | -1.48219900 |
| C | 4.22396400  | -1.92772400 | -0.76650300 |
| C | 4.05125000  | -1.12301000 | 0.35282800  |
| C | 2.76496900  | -0.74864700 | 0.75050800  |
| C | 1.64481500  | -1.18161200 | 0.02151000  |
| C | 1.83132900  | -2.00889900 | -1.08496500 |
| H | 3.24788000  | -3.00083000 | -2.35602100 |
| H | 5.22409100  | -2.21237000 | -1.07472900 |
| H | 4.90283500  | -0.78437200 | 0.93235600  |
| H | 0.96357600  | -2.33181700 | -1.65241400 |
| C | 2.61688900  | 0.04144000  | 1.94580700  |
| N | 2.53547900  | 0.65204800  | 2.92525200  |
| C | 0.26039400  | -0.78427700 | 0.43785500  |
| N | -0.56628500 | -1.87852500 | 0.65121200  |
| N | -0.18471700 | 0.39780300  | 0.60200500  |
| C | 0.52553800  | 1.52295500  | 0.14209900  |
| C | 0.97810700  | 1.61636100  | -1.17931100 |
| C | 0.69273300  | 2.60928600  | 1.00685300  |
| C | 1.61249100  | 2.77513800  | -1.61620000 |
| H | 0.80856500  | 0.78638500  | -1.86011900 |
| C | 1.34047100  | 3.75549000  | 0.56541300  |
| H | 0.33160400  | 2.52179800  | 2.02591000  |
| C | 1.80252600  | 3.84528800  | -0.74693100 |
| H | 1.95592500  | 2.83988000  | -2.64402200 |
| H | 1.48240400  | 4.58531100  | 1.25039600  |
| H | 2.30004100  | 4.74640200  | -1.09026100 |
| H | -3.42160400 | -2.78873700 | 1.61414800  |
| C | -1.93155400 | -1.86358600 | 0.92223600  |
| C | -2.76639400 | -0.73875200 | 0.39402800  |
| C | -3.70202400 | -0.16136200 | 1.24784100  |
| C | -2.71772300 | -0.30272000 | -0.94136200 |
| C | -4.56012400 | 0.83774500  | 0.79762800  |
| H | -3.73304800 | -0.48519100 | 2.28337600  |
| C | -3.58346600 | 0.69453000  | -1.39520800 |
| C | -4.50287400 | 1.26697200  | -0.52412000 |

|   |             |             |             |
|---|-------------|-------------|-------------|
| H | -5.27110500 | 1.28353800  | 1.48512900  |
| H | -3.52509800 | 1.01319800  | -2.43008000 |
| H | -5.16871600 | 2.04590200  | -0.87843400 |
| N | -2.40597200 | -2.85833500 | 1.56211400  |
| C | -1.77470300 | -0.85989900 | -1.87499100 |
| N | -1.02158200 | -1.28683000 | -2.64391800 |
| H | -0.12833800 | -2.76131400 | 0.88121300  |

E(M06-2X-D3/6-31G(d,p)) = -1120.67586261 A.U.

Zero-point correction= 0.324662 (Hartree/Particle)  
 Thermal correction to Energy= 0.389052  
 Thermal correction to Enthalpy= 0.390741  
 Thermal correction to Gibbs Free Energy= 0.200455

E(M06-2X-D3/6-311+G(d,p)) = -1120.94639063 A.U.

### TS3-1

|   |             |             |             |
|---|-------------|-------------|-------------|
| C | 2.24945400  | -3.61024400 | -1.81056400 |
| C | 2.98096500  | -4.28308900 | -0.83611100 |
| C | 3.10976800  | -3.73819900 | 0.43563800  |
| C | 2.52135500  | -2.50551800 | 0.72834900  |
| C | 1.80065200  | -1.81313900 | -0.25915000 |
| C | 1.65209400  | -2.38719100 | -1.52084300 |
| H | 2.13935800  | -4.03813300 | -2.80119900 |
| H | 3.44324700  | -5.23822600 | -1.06061100 |
| H | 3.65491600  | -4.26038400 | 1.21384700  |
| H | 1.09070100  | -1.85356200 | -2.28116600 |
| C | 2.62724700  | -1.99614200 | 2.07119100  |
| N | 2.71133400  | -1.62781400 | 3.16483400  |
| C | 1.16976900  | -0.48925700 | 0.03998200  |
| N | -0.19819700 | -0.47846700 | -0.24506700 |
| N | 1.72517000  | 0.54686800  | 0.52505700  |
| C | 3.12386400  | 0.67758300  | 0.61375000  |
| C | 3.96079600  | 0.41048700  | -0.47619400 |
| C | 3.66908800  | 1.18438700  | 1.79771500  |
| C | 5.33081700  | 0.62670800  | -0.36621800 |
| H | 3.52884000  | 0.05507900  | -1.40759600 |
| C | 5.03961600  | 1.37914800  | 1.90280800  |
| H | 3.00387300  | 1.38915700  | 2.62966800  |
| C | 5.87649900  | 1.10344600  | 0.82211800  |
| H | 5.97232900  | 0.42155800  | -1.21757500 |
| H | 5.45626500  | 1.75249300  | 2.83271700  |

|   |             |             |             |
|---|-------------|-------------|-------------|
| H | 6.94605100  | 1.26634300  | 0.90486000  |
| H | -2.82354400 | 1.27332100  | -0.46987500 |
| C | -0.98845800 | 0.60881800  | -0.33318500 |
| C | -0.46015300 | 1.99416900  | -0.52385900 |
| C | -0.94765700 | 3.00125300  | 0.30387400  |
| C | 0.43436500  | 2.32399600  | -1.55629900 |
| C | -0.52852600 | 4.31818200  | 0.12473000  |
| H | -1.64114000 | 2.74828000  | 1.10199100  |
| C | 0.84238800  | 3.64509800  | -1.73708900 |
| C | 0.36363500  | 4.64082000  | -0.89138800 |
| H | -0.90339000 | 5.09035700  | 0.78779500  |
| H | 1.53345300  | 3.87948200  | -2.53905800 |
| H | 0.68966400  | 5.66568100  | -1.03006500 |
| N | -2.27852800 | 0.43583300  | -0.29171800 |
| C | 0.95148500  | 1.31318900  | -2.43995400 |
| N | 1.37813300  | 0.51032100  | -3.15682900 |
| H | -0.77511900 | -1.37754500 | -0.26006500 |
| N | -2.24859100 | -2.11729000 | -0.22460400 |
| C | -2.97587200 | -1.16358700 | -0.13729400 |
| C | -4.43646600 | -0.96962500 | 0.02923100  |
| C | -5.24959200 | -1.93375000 | -0.57268000 |
| C | -5.05315900 | 0.03565900  | 0.79479800  |
| C | -6.63119700 | -1.88970700 | -0.44465800 |
| H | -4.76010400 | -2.72099900 | -1.13532000 |
| C | -6.44855900 | 0.07374300  | 0.92800900  |
| C | -4.31088200 | 1.05047200  | 1.49714100  |
| C | -7.23586300 | -0.88169000 | 0.30491200  |
| H | -7.23927200 | -2.64641000 | -0.92934100 |
| H | -6.89662300 | 0.85536900  | 1.53192400  |
| N | -3.76500300 | 1.90582500  | 2.05497200  |
| H | -8.31455100 | -0.84490800 | 0.40999700  |

E(M06-2X-D3/6-31G(d,p)) = -1537.22295843 A.U.

Zero-point correction= 0.423560 (Hartree/Particle)  
 Thermal correction to Energy= 0.511336  
 Thermal correction to Enthalpy= 0.513024  
 Thermal correction to Gibbs Free Energy= 0.267881

E(M06-2X-D3/6-311+G(d,p)) = -1537.59181640 A.U.

### INT3-1

|   |            |             |             |
|---|------------|-------------|-------------|
| C | 2.54115200 | -3.52811000 | -1.76119900 |
|---|------------|-------------|-------------|

|   |             |             |             |
|---|-------------|-------------|-------------|
| C | 3.43827800  | -4.09314000 | -0.85812000 |
| C | 3.61402500  | -3.51703500 | 0.39287200  |
| C | 2.90912000  | -2.35813400 | 0.73227300  |
| C | 2.02477200  | -1.76723900 | -0.18581800 |
| C | 1.82938300  | -2.38192800 | -1.42167800 |
| H | 2.39199000  | -3.98170600 | -2.73540800 |
| H | 3.99189600  | -4.98762900 | -1.12210100 |
| H | 4.28765000  | -3.95638200 | 1.12017200  |
| H | 1.13285900  | -1.93929700 | -2.12565300 |
| C | 3.06958100  | -1.83005800 | 2.06269800  |
| N | 3.20224100  | -1.45161900 | 3.14817000  |
| C | 1.26117700  | -0.52416600 | 0.16819600  |
| N | -0.12537700 | -0.71114700 | 0.06290400  |
| N | 1.75419000  | 0.56899100  | 0.60200700  |
| C | 3.13349600  | 0.84506200  | 0.56361300  |
| C | 3.88308200  | 0.67103800  | -0.60621300 |
| C | 3.73461500  | 1.41254900  | 1.69192900  |
| C | 5.22437500  | 1.03953300  | -0.63151100 |
| H | 3.40356500  | 0.26440400  | -1.49251700 |
| C | 5.07924200  | 1.75680300  | 1.66281300  |
| H | 3.13699400  | 1.54404700  | 2.58758700  |
| C | 5.82948800  | 1.57474700  | 0.50186500  |
| H | 5.79610100  | 0.90676100  | -1.54471700 |
| H | 5.54296900  | 2.17500000  | 2.55042300  |
| H | 6.87747300  | 1.85539500  | 0.48011700  |
| H | -2.83449100 | 0.89648800  | -0.33737400 |
| C | -0.92164500 | 0.28111500  | -0.12697500 |
| C | -0.56692900 | 1.71191100  | -0.41871800 |
| C | -1.05961400 | 2.71184900  | 0.41431300  |
| C | 0.20039200  | 2.07392500  | -1.53825100 |
| C | -0.77204900 | 4.05029100  | 0.15397000  |
| H | -1.66164600 | 2.44418800  | 1.27659800  |
| C | 0.48598500  | 3.41486900  | -1.79692900 |
| C | 0.00151000  | 4.40279600  | -0.94639300 |
| H | -1.15814300 | 4.81471000  | 0.81956400  |
| H | 1.08481800  | 3.67035000  | -2.66391400 |
| H | 0.22708300  | 5.44410600  | -1.14785100 |
| N | -2.28212300 | 0.08950700  | -0.08326500 |
| C | 0.71159900  | 1.07135700  | -2.43324300 |
| N | 1.12988500  | 0.28129500  | -3.16922100 |
| H | -1.44841000 | -2.20839800 | 0.34858000  |
| N | -2.46831800 | -2.25403800 | 0.38937800  |
| C | -2.97312600 | -1.11082000 | 0.18264700  |
| C | -4.47063300 | -0.99104700 | 0.16168400  |

|   |             |             |             |
|---|-------------|-------------|-------------|
| C | -5.17785700 | -2.09588900 | -0.31583300 |
| C | -5.20535000 | 0.11825200  | 0.61805200  |
| C | -6.56561100 | -2.09591900 | -0.36243700 |
| H | -4.60309800 | -2.95668700 | -0.63779900 |
| C | -6.60639000 | 0.11558000  | 0.57466900  |
| C | -4.57909400 | 1.28765800  | 1.17981800  |
| C | -7.28470100 | -0.98689800 | 0.07902900  |
| H | -7.08902000 | -2.96607200 | -0.74458800 |
| H | -7.14460500 | 0.98255300  | 0.94182200  |
| N | -4.10979700 | 2.25241600  | 1.61578400  |
| H | -8.36852300 | -0.98338000 | 0.04402700  |

E(M06-2X-D3/6-31G(d,p)) = -1537.26881047 A.U.

|                                          |                             |
|------------------------------------------|-----------------------------|
| Zero-point correction=                   | 0.427450 (Hartree/Particle) |
| Thermal correction to Energy=            | 0.515648                    |
| Thermal correction to Enthalpy=          | 0.517336                    |
| Thermal correction to Gibbs Free Energy= | 0.271040                    |

E(M06-2X-D3/6-311+G(d,p)) = -1537.63676112 A.U.

### INT3-2

|   |             |             |             |
|---|-------------|-------------|-------------|
| C | -2.29858500 | -3.92342900 | 1.72795300  |
| C | -3.30142500 | -3.29611500 | 2.46205400  |
| C | -3.46123000 | -1.91926000 | 2.37484100  |
| C | -2.62538600 | -1.17028100 | 1.54083900  |
| C | -1.61915100 | -1.79834400 | 0.78882200  |
| C | -1.45644400 | -3.17963600 | 0.90688400  |
| H | -2.16620200 | -4.99821700 | 1.79591100  |
| H | -3.95422900 | -3.87551900 | 3.10587300  |
| H | -4.22680700 | -1.40960300 | 2.94939000  |
| H | -0.66823800 | -3.66086000 | 0.33541300  |
| C | -2.82186000 | 0.25497800  | 1.50874100  |
| N | -3.01258500 | 1.39677300  | 1.53631800  |
| C | -0.70481000 | -1.05405900 | -0.13447400 |
| N | 0.61457700  | -1.49087900 | -0.02000400 |
| N | -1.01076800 | -0.22601300 | -1.05693000 |
| C | -2.33045500 | 0.03156300  | -1.46371200 |
| C | -2.66009600 | 1.35587100  | -1.77451100 |
| C | -3.28830000 | -0.97197600 | -1.65803400 |
| C | -3.94055300 | 1.68134600  | -2.20010800 |
| H | -1.89314500 | 2.11589000  | -1.66292600 |
| C | -4.56340600 | -0.64053400 | -2.10351000 |

|   |             |             |             |
|---|-------------|-------------|-------------|
| H | -3.02366000 | -2.00822000 | -1.47303000 |
| C | -4.90125000 | 0.68496800  | -2.36254500 |
| H | -4.18736300 | 2.71586500  | -2.41746600 |
| H | -5.29645400 | -1.42709700 | -2.25291100 |
| H | -5.89946500 | 0.93787300  | -2.70407300 |
| H | 2.34682200  | 1.12622200  | -0.51754000 |
| C | 1.64545500  | -0.74988400 | -0.05973400 |
| C | 2.97866300  | -1.39096300 | -0.24552200 |
| C | 4.14407300  | -0.71148700 | 0.11137800  |
| C | 3.09427300  | -2.69199200 | -0.77586400 |
| C | 5.39711900  | -1.29113000 | -0.06570100 |
| H | 4.07659600  | 0.27712300  | 0.55208100  |
| C | 4.35519600  | -3.26923400 | -0.94869500 |
| C | 5.50497900  | -2.56980700 | -0.59960200 |
| H | 6.28443100  | -0.73716600 | 0.22112800  |
| H | 4.41998000  | -4.26949400 | -1.36265100 |
| H | 6.47809200  | -3.02736400 | -0.74141300 |
| N | 1.66492200  | 0.64269700  | 0.04826900  |
| C | 1.96720400  | -3.50350100 | -1.16818000 |
| N | 1.16152700  | -4.25882000 | -1.51592200 |
| H | -0.47053700 | 1.51296400  | 2.22802100  |
| N | 0.10322100  | 0.82925200  | 1.73757100  |
| C | 0.80788400  | 1.39488100  | 0.84377200  |
| C | 0.75745400  | 2.86281200  | 0.53773200  |
| C | -0.50352200 | 3.45751900  | 0.46734100  |
| C | 1.89123400  | 3.67302300  | 0.35008300  |
| C | -0.63348000 | 4.81697200  | 0.20091600  |
| H | -1.38805000 | 2.84239200  | 0.61558300  |
| C | 1.75796600  | 5.04197800  | 0.09203200  |
| C | 3.22165900  | 3.13045000  | 0.44191200  |
| C | 0.49459100  | 5.61112400  | 0.01249900  |
| H | -1.62463000 | 5.25406400  | 0.14085300  |
| H | 2.65072800  | 5.64413300  | -0.03676700 |
| N | 4.29378500  | 2.69564400  | 0.49501200  |
| H | 0.39259500  | 6.67131000  | -0.19132200 |

E(M06-2X-D3/6-31G(d,p)) = -1537.26825131 A.U.

Zero-point correction= 0.427651 (Hartree/Particle)  
 Thermal correction to Energy= 0.515592  
 Thermal correction to Enthalpy= 0.517280  
 Thermal correction to Gibbs Free Energy= 0.275378

E(M06-2X-D3/6-311+G(d,p)) = -1537.63539334 A.U.

**TS3-3**

|   |             |             |             |
|---|-------------|-------------|-------------|
| C | 3.17391700  | 1.53795200  | 2.69709500  |
| C | 4.01199100  | 0.46790500  | 2.98630000  |
| C | 3.80055000  | -0.75264600 | 2.35709200  |
| C | 2.75624700  | -0.89909600 | 1.43933300  |
| C | 1.90319000  | 0.18130600  | 1.14149900  |
| C | 2.13242600  | 1.39240700  | 1.78332500  |
| H | 3.32351200  | 2.49981500  | 3.17668900  |
| H | 4.82521200  | 0.57746900  | 3.69541100  |
| H | 4.43857500  | -1.60422000 | 2.56724300  |
| H | 1.49672200  | 2.23833500  | 1.55484300  |
| C | 2.58554200  | -2.20681000 | 0.85639800  |
| N | 2.45326800  | -3.28234500 | 0.44631700  |
| C | 0.78530400  | 0.04092700  | 0.10420500  |
| N | -0.00504000 | 1.25420200  | 0.04306700  |
| N | 1.14236500  | -0.42688700 | -1.19268400 |
| C | 2.38881300  | -0.14697000 | -1.73447000 |
| C | 2.97927800  | -1.10839700 | -2.57546000 |
| C | 3.07192300  | 1.06943200  | -1.54036200 |
| C | 4.20409000  | -0.87019000 | -3.18126900 |
| H | 2.45710900  | -2.04923500 | -2.72003000 |
| C | 4.29939000  | 1.29643100  | -2.15206800 |
| H | 2.61113000  | 1.84681200  | -0.93882600 |
| C | 4.87928400  | 0.33215200  | -2.97224100 |
| H | 4.64027600  | -1.63393700 | -3.81871100 |
| H | 4.80210500  | 2.24582900  | -1.99067000 |
| H | 5.83773400  | 0.51555100  | -3.44633500 |
| H | -2.97346700 | 0.01356300  | 0.39337000  |
| C | -1.27171000 | 1.17552100  | 0.08125700  |
| C | -2.14310300 | 2.35654300  | -0.16099100 |
| C | -3.32802900 | 2.20914400  | -0.88382200 |
| C | -1.78731000 | 3.63981600  | 0.28989600  |
| C | -4.14256500 | 3.30439900  | -1.15528500 |
| H | -3.61286500 | 1.23489100  | -1.26813000 |
| C | -2.60719900 | 4.73746700  | 0.01285300  |
| C | -3.78256700 | 4.57092700  | -0.70909800 |
| H | -5.05517800 | 3.16081000  | -1.72354300 |
| H | -2.31265500 | 5.71531800  | 0.37741400  |
| H | -4.41196800 | 5.42823600  | -0.92081200 |
| N | -1.96928100 | -0.02738000 | 0.28958900  |
| C | -0.61460700 | 3.88919900  | 1.08787600  |
| N | 0.27659900  | 4.19142900  | 1.76142700  |



|   |             |             |             |
|---|-------------|-------------|-------------|
| H | 0.55894400  | -1.69023500 | -0.40124200 |
| N | -0.00039500 | -1.20424200 | 0.45452800  |
| C | -1.30848400 | -1.20479900 | 0.36176100  |
| C | -1.99573100 | -2.51640400 | 0.32004700  |
| C | -1.23433200 | -3.64317800 | 0.65725300  |
| C | -3.34111600 | -2.71432100 | -0.05701400 |
| C | -1.78529000 | -4.91722100 | 0.61532500  |
| H | -0.19690800 | -3.51177700 | 0.94870400  |
| C | -3.89162700 | -3.99965300 | -0.08712700 |
| C | -4.21201300 | -1.63670300 | -0.44172400 |
| C | -3.11542800 | -5.10032500 | 0.24715000  |
| H | -1.16755100 | -5.76957200 | 0.87557800  |
| H | -4.92763500 | -4.11843400 | -0.38433400 |
| N | -4.93331100 | -0.77817200 | -0.73362200 |
| H | -3.54752400 | -6.09434400 | 0.21662700  |

E(M06-2X-D3/6-31G(d,p)) = -1537.20675297 A.U.

Zero-point correction= 0.423803 (Hartree/Particle)

Thermal correction to Energy= 0.510115

Thermal correction to Enthalpy= 0.511803

Thermal correction to Gibbs Free Energy= 0.272592

E(M06-2X-D3/6-311+G(d,p)) = -1537.57165514 A.U.

### TS3-3H

|   |             |             |             |
|---|-------------|-------------|-------------|
| C | -3.79899200 | -0.90802400 | -2.91637800 |
| C | -3.77680400 | -2.27637100 | -3.15844800 |
| C | -2.85926000 | -3.07128100 | -2.48348000 |
| C | -1.98022200 | -2.49614500 | -1.56053400 |
| C | -1.99931200 | -1.11321800 | -1.30482700 |
| C | -2.91439500 | -0.33574500 | -2.00421800 |
| H | -4.51386100 | -0.27233400 | -3.42881700 |
| H | -4.46727300 | -2.72442500 | -3.86461800 |
| H | -2.81412100 | -4.14088700 | -2.65828800 |
| H | -2.96074800 | 0.72882200  | -1.81278200 |
| C | -1.02882500 | -3.38145600 | -0.93745700 |
| N | -0.25505500 | -4.14477300 | -0.53466800 |
| C | -1.06125500 | -0.51861300 | -0.23201100 |
| N | -1.25219800 | 0.94827800  | -0.18714300 |
| N | -1.17858100 | -1.09727200 | 1.04578500  |
| C | -2.40896100 | -1.15850500 | 1.66977900  |
| C | -2.51927500 | -2.02292400 | 2.78301600  |

|   |             |             |             |
|---|-------------|-------------|-------------|
| C | -3.56398200 | -0.42348900 | 1.32135400  |
| C | -3.70158100 | -2.15632200 | 3.49151700  |
| H | -1.64239200 | -2.59819500 | 3.07066600  |
| C | -4.74835700 | -0.57213400 | 2.03677200  |
| H | -3.52765100 | 0.29564400  | 0.51202000  |
| C | -4.83875700 | -1.43543400 | 3.12331800  |
| H | -3.73902400 | -2.83615700 | 4.33869500  |
| H | -5.61389600 | 0.01291600  | 1.73665500  |
| H | -5.76745400 | -1.54151600 | 3.67393100  |
| H | 1.58471400  | 2.01450600  | -1.35429700 |
| C | -0.33048200 | 1.74912600  | -0.50986900 |
| C | -0.45382100 | 3.21508300  | -0.27934100 |
| C | 0.66381800  | 3.96173000  | 0.09519400  |
| C | -1.69686700 | 3.86609700  | -0.37190600 |
| C | 0.55734100  | 5.32337200  | 0.36505900  |
| H | 1.62827900  | 3.47877300  | 0.21578800  |
| C | -1.79825800 | 5.23339900  | -0.10266400 |
| C | -0.67309500 | 5.96196500  | 0.26499200  |
| H | 1.44146100  | 5.87746900  | 0.66137200  |
| H | -2.76685500 | 5.71299100  | -0.19035300 |
| H | -0.76179200 | 7.02242000  | 0.47370000  |
| N | 0.91257500  | 1.32925200  | -1.04197500 |
| C | -2.90356700 | 3.19529900  | -0.78337900 |
| N | -3.91755700 | 2.77069900  | -1.14582600 |
| N | 0.33649100  | -0.87141800 | -0.66677700 |
| C | 1.21934900  | 0.01136100  | -0.99678300 |
| C | 2.59595300  | -0.48594600 | -1.27956800 |
| C | 2.71478900  | -1.80521100 | -1.72721700 |
| C | 3.77198000  | 0.24781000  | -1.03443900 |
| C | 3.96436700  | -2.38468200 | -1.91429100 |
| H | 1.81282900  | -2.37690100 | -1.92219800 |
| C | 5.02566600  | -0.34149600 | -1.22164600 |
| C | 3.75934600  | 1.61601300  | -0.58977700 |
| C | 5.12190300  | -1.65610700 | -1.65783100 |
| H | 4.02904300  | -3.41005300 | -2.26190600 |
| H | 5.91476400  | 0.24140700  | -1.00824200 |
| N | 3.78620400  | 2.73306200  | -0.28463700 |
| H | 6.09815700  | -2.10703900 | -1.79787700 |
| H | 0.79800100  | -1.78662400 | 0.01000800  |
| N | 1.15556800  | -2.33769000 | 1.18867100  |
| H | 0.15808600  | -2.01959700 | 1.47191200  |
| H | 1.30017700  | -3.34194300 | 1.17816200  |
| C | 2.20532100  | -1.54435100 | 1.70794800  |
| C | 1.92006100  | -0.22500400 | 2.08246600  |

|   |            |             |            |
|---|------------|-------------|------------|
| C | 3.52453900 | -2.00157300 | 1.71357000 |
| C | 2.95896300 | 0.62616700  | 2.44476400 |
| H | 0.88135900 | 0.10142600  | 2.08154000 |
| C | 4.55322500 | -1.14063300 | 2.08150400 |
| H | 3.73967600 | -3.02231900 | 1.40842100 |
| C | 4.27926000 | 0.17785200  | 2.43933500 |
| H | 2.73528300 | 1.65048200  | 2.72730300 |
| H | 5.57711900 | -1.50256200 | 2.08111500 |
| H | 5.08509600 | 0.84907700  | 2.71694100 |

E(M06-2X-D3/6-31G(d,p)) = -1824.73920343 A.U.

Zero-point correction= 0.543179 (Hartree/Particle)  
 Thermal correction to Energy= 0.649261  
 Thermal correction to Enthalpy= 0.650949  
 Thermal correction to Gibbs Free Energy= 0.371370

E(M06-2X-D3/6-311+G(d,p)) = -1825.17283734 A.U.

### INT3-3

|   |            |             |             |
|---|------------|-------------|-------------|
| C | 3.30295400 | -0.21695300 | 2.98604700  |
| C | 3.76172000 | -1.52864600 | 3.02120200  |
| C | 3.20809700 | -2.47213400 | 2.16390000  |
| C | 2.19313500 | -2.09709100 | 1.28096400  |
| C | 1.71638400 | -0.77451100 | 1.24886900  |
| C | 2.28818500 | 0.15725400  | 2.10616700  |
| H | 3.73960500 | 0.52892200  | 3.64215800  |
| H | 4.55300500 | -1.81787800 | 3.70422300  |
| H | 3.55704000 | -3.49902600 | 2.16472900  |
| H | 1.94498700 | 1.18503500  | 2.06424000  |
| C | 1.67555300 | -3.10259000 | 0.38648500  |
| N | 1.29365800 | -3.92508100 | -0.33498600 |
| C | 0.61800500 | -0.39452300 | 0.25287200  |
| N | 0.25725200 | 1.00660400  | 0.43904600  |
| N | 1.03052100 | -0.61136600 | -1.14281000 |
| C | 2.34661100 | -0.33144600 | -1.56269400 |
| C | 2.98093400 | -1.21317200 | -2.44478000 |
| C | 3.02026200 | 0.82017500  | -1.14354200 |
| C | 4.25999800 | -0.93734000 | -2.91311400 |
| H | 2.46842600 | -2.12223700 | -2.75024600 |
| C | 4.30599500 | 1.07616100  | -1.60590200 |
| H | 2.53764400 | 1.51333800  | -0.46477200 |
| C | 4.93359500 | 0.20739200  | -2.49507400 |

|   |             |             |             |
|---|-------------|-------------|-------------|
| H | 4.73541400  | -1.63153400 | -3.59930500 |
| H | 4.81304700  | 1.97434700  | -1.26653500 |
| H | 5.93486600  | 0.41761100  | -2.85578700 |
| H | -2.68180400 | 0.69448700  | -0.85356900 |
| C | -0.89249400 | 1.34700500  | 0.01323200  |
| C | -1.31715900 | 2.77526800  | 0.03654300  |
| C | -2.65481400 | 3.13395000  | -0.13540400 |
| C | -0.37817700 | 3.80547700  | 0.24965400  |
| C | -3.05563100 | 4.46649400  | -0.12842600 |
| H | -3.42522200 | 2.37954600  | -0.24211700 |
| C | -0.78677100 | 5.14251900  | 0.25395900  |
| C | -2.12071700 | 5.47666100  | 0.05761600  |
| H | -4.10547100 | 4.70378900  | -0.26220700 |
| H | -0.04044600 | 5.91241600  | 0.41532500  |
| H | -2.42429300 | 6.51776000  | 0.06079700  |
| N | -1.81314800 | 0.40252600  | -0.43478000 |
| C | 1.02716800  | 3.59701200  | 0.49873100  |
| N | 2.16217800  | 3.60339300  | 0.72803600  |
| H | 0.73786900  | -1.53970200 | -1.43043300 |
| N | -0.50312600 | -1.30461300 | 0.45116600  |
| C | -1.62162200 | -0.90556800 | -0.01911600 |
| C | -2.73283100 | -1.90393100 | -0.10045300 |
| C | -2.34816600 | -3.24826400 | -0.12985900 |
| C | -4.10806500 | -1.60893900 | -0.14869100 |
| C | -3.29507000 | -4.26278700 | -0.19453100 |
| H | -1.28788100 | -3.47951800 | -0.10193900 |
| C | -5.05972200 | -2.63444100 | -0.21591600 |
| C | -4.62314600 | -0.26643600 | -0.13291000 |
| C | -4.65379300 | -3.95999600 | -0.23777500 |
| H | -2.96502400 | -5.29580600 | -0.21789000 |
| H | -6.11156100 | -2.37273800 | -0.24728300 |
| N | -5.07427600 | 0.80026800  | -0.15635200 |
| H | -5.39413600 | -4.75053900 | -0.29296400 |

E(M06-2X-D3/6-31G(d,p)) = -1537.29331591 A.U.

Zero-point correction= 0.429156 (Hartree/Particle)  
 Thermal correction to Energy= 0.515971  
 Thermal correction to Enthalpy= 0.517660  
 Thermal correction to Gibbs Free Energy= 0.277487

E(M06-2X-D3/6-311+G(d,p)) = -1537.65810290 A.U.

TS3-4

|   |             |             |             |
|---|-------------|-------------|-------------|
| C | 3.83640600  | 0.66780500  | -2.53240700 |
| C | 4.25734400  | 1.98400200  | -2.37704500 |
| C | 3.52373400  | 2.85388200  | -1.57866200 |
| C | 2.36330800  | 2.39852500  | -0.94944300 |
| C | 1.92699100  | 1.07236000  | -1.11321300 |
| C | 2.67858500  | 0.21057500  | -1.90371800 |
| H | 4.41066800  | -0.01694400 | -3.14755100 |
| H | 5.15788700  | 2.33485100  | -2.86936800 |
| H | 3.83972000  | 3.88118500  | -1.43391300 |
| H | 2.34801300  | -0.81594900 | -2.02508100 |
| C | 1.65435800  | 3.29947300  | -0.07771000 |
| N | 1.11865000  | 3.99491300  | 0.67952500  |
| C | 0.66481800  | 0.58943500  | -0.43561700 |
| N | 0.36874200  | -0.78400700 | -0.76715200 |
| N | 0.80193300  | 0.63500300  | 1.10655900  |
| C | 1.96841000  | 0.03362700  | 1.69178400  |
| C | 2.87993000  | 0.86636700  | 2.34156200  |
| C | 2.19847300  | -1.33953600 | 1.61633400  |
| C | 4.01836300  | 0.32486400  | 2.92657500  |
| H | 2.69393900  | 1.93732000  | 2.38222700  |
| C | 3.35051500  | -1.86740900 | 2.19193800  |
| H | 1.49506400  | -1.98904200 | 1.11013900  |
| C | 4.25937600  | -1.04412900 | 2.84956400  |
| H | 4.72085300  | 0.97757400  | 3.43407200  |
| H | 3.53135300  | -2.93501400 | 2.12581200  |
| H | 5.15133900  | -1.46698500 | 3.29914400  |
| H | -0.42874700 | 0.10685300  | 1.23869900  |
| C | -0.71688600 | -1.15888100 | -0.18946800 |
| C | -1.12094300 | -2.58438300 | -0.20510400 |
| C | -2.26674600 | -2.96970400 | 0.48897100  |
| C | -0.37187600 | -3.57119000 | -0.88127000 |
| C | -2.68769600 | -4.29538300 | 0.49446900  |
| H | -2.82951900 | -2.20640500 | 1.00900300  |
| C | -0.80275200 | -4.90112700 | -0.87229700 |
| C | -1.95977000 | -5.26178500 | -0.19059600 |
| H | -3.59171700 | -4.56437200 | 1.02995200  |
| H | -0.21841200 | -5.64417600 | -1.40388400 |
| H | -2.28561700 | -6.29647300 | -0.19585500 |
| N | -1.49581900 | -0.25454200 | 0.56447800  |
| C | 0.85418000  | -3.31115900 | -1.59619200 |
| N | 1.85008400  | -3.24115800 | -2.18285400 |
| H | 0.74312300  | 1.61518800  | 1.38573900  |
| N | -0.46710800 | 1.46201000  | -0.69076000 |

|   |             |             |             |
|---|-------------|-------------|-------------|
| C | -1.51103700 | 0.99016300  | -0.10196600 |
| C | -2.72282700 | 1.84435100  | -0.01487400 |
| C | -2.54047400 | 3.22909700  | -0.07702000 |
| C | -4.02535700 | 1.34241000  | 0.14384800  |
| C | -3.62138000 | 4.09679300  | 0.01472800  |
| H | -1.52921200 | 3.60791400  | -0.18322300 |
| C | -5.11162900 | 2.22172800  | 0.23140400  |
| C | -4.35286400 | -0.06044400 | 0.17295100  |
| C | -4.91041300 | 3.59376600  | 0.17082900  |
| H | -3.45441900 | 5.16779900  | -0.02827200 |
| H | -6.10891200 | 1.81069300  | 0.34261100  |
| N | -4.77078800 | -1.14006700 | 0.18366000  |
| H | -5.75811700 | 4.26637000  | 0.24541200  |

E(M06-2X-D3/6-31G(d,p)) = -1537.24694155 A.U.

Zero-point correction= 0.424987 (Hartree/Particle)  
 Thermal correction to Energy= 0.510186  
 Thermal correction to Enthalpy= 0.511874  
 Thermal correction to Gibbs Free Energy= 0.274114

E(M06-2X-D3/6-311+G(d,p)) = -1537.60979066 A.U.

### Triazine

|   |             |             |             |
|---|-------------|-------------|-------------|
| C | -2.72927500 | 4.19513300  | 0.00123900  |
| C | -4.07353500 | 3.83768400  | 0.00089000  |
| C | -4.42842800 | 2.49469100  | 0.00043300  |
| C | -3.44469000 | 1.49970100  | 0.00023400  |
| C | -2.08142100 | 1.85805700  | 0.00063900  |
| C | -1.74466600 | 3.21410400  | 0.00102300  |
| H | -2.43801200 | 5.23994600  | 0.00169200  |
| H | -4.84685900 | 4.59829600  | 0.00097900  |
| H | -5.47109400 | 2.19666800  | 0.00000400  |
| H | -0.69671200 | 3.49323100  | 0.00131100  |
| C | -3.94271200 | 0.14619400  | -0.00051500 |
| N | -4.48650500 | -0.87587000 | -0.00142300 |
| C | -0.98153500 | 0.85906100  | 0.00033700  |
| N | 0.27109700  | 1.33398500  | 0.00034600  |
| C | 1.23494100  | 0.42082500  | -0.00026200 |
| C | 2.65015700  | 0.87377800  | -0.00046400 |
| C | 3.65558200  | -0.09643300 | -0.00072000 |
| C | 3.02184600  | 2.23349300  | -0.00036400 |
| C | 4.99761600  | 0.26522700  | -0.00085100 |

|   |             |             |             |
|---|-------------|-------------|-------------|
| H | 3.37259000  | -1.14323400 | -0.00092600 |
| C | 4.37543600  | 2.58748700  | -0.00045400 |
| C | 5.36051500  | 1.60801900  | -0.00061700 |
| H | 5.75665700  | -0.50951400 | -0.00112400 |
| H | 4.63948400  | 3.63925100  | -0.00055500 |
| H | 6.40605900  | 1.89706100  | -0.00064400 |
| N | 1.01991600  | -0.90144600 | -0.00025600 |
| C | 2.09909000  | 3.34187700  | -0.00024800 |
| N | 1.48439700  | 4.32297200  | -0.00107700 |
| N | -1.29044700 | -0.43214400 | -0.00010800 |
| C | -0.25280900 | -1.27941300 | -0.00034200 |
| C | -0.56819100 | -2.73142600 | -0.00031900 |
| C | -1.91123200 | -3.11679200 | -0.00156600 |
| C | 0.42322100  | -3.73334700 | 0.00076300  |
| C | -2.26907800 | -4.45986700 | -0.00157300 |
| H | -2.67611300 | -2.34812000 | -0.00239000 |
| C | 0.05288800  | -5.08257900 | 0.00085700  |
| C | 1.84452700  | -3.48867800 | 0.00184600  |
| C | -1.28789600 | -5.44581500 | -0.00039600 |
| H | -3.31961900 | -4.72983200 | -0.00238700 |
| H | 0.83180200  | -5.83696900 | 0.00163000  |
| N | 3.00161200  | -3.44849500 | 0.00327800  |
| H | -1.56078700 | -6.49567300 | -0.00035000 |

E(M06-2X-D3/6-31G(d,p)) = -1249.81769575 A.U.

Zero-point correction= 0.307312 (Hartree/Particle)  
 Thermal correction to Energy= 0.372655  
 Thermal correction to Enthalpy= 0.374343  
 Thermal correction to Gibbs Free Energy= 0.182187

E(M06-2X-D3/6-311+G(d,p)) = -1250.11041585 A.U.

#### TS2-4

|   |            |             |             |
|---|------------|-------------|-------------|
| C | 3.52265600 | -4.12565200 | 0.32814400  |
| C | 2.27348100 | -4.74845900 | 0.21240100  |
| C | 1.10765700 | -4.00367500 | 0.05655700  |
| C | 1.21908500 | -2.62243900 | 0.01357500  |
| C | 2.46397000 | -2.00366700 | 0.12617800  |
| C | 3.63354300 | -2.73905100 | 0.28868600  |
| H | 4.41389100 | -4.73131200 | 0.45285600  |
| H | 2.21880000 | -5.83182300 | 0.24840400  |
| H | 0.13023300 | -4.46685100 | -0.02932800 |

|   |             |             |             |
|---|-------------|-------------|-------------|
| H | 4.60816800  | -2.26854100 | 0.39013200  |
| C | 0.15345900  | -1.58761200 | -0.12548100 |
| N | -1.07802500 | -1.65471500 | -0.20818400 |
| C | 2.22667600  | -0.54777200 | 0.04070200  |
| N | 0.95541900  | -0.32062300 | -0.10941800 |
| H | 0.38446900  | 0.55465300  | -0.18703500 |
| N | -1.18076500 | 1.15584000  | -0.12056300 |
| C | -1.92533100 | 0.23624600  | -0.16171100 |
| C | -3.35273400 | -0.10333600 | -0.16598800 |
| C | -3.85503900 | -1.36162800 | -0.49331000 |
| C | -4.26075800 | 0.93017600  | 0.14809400  |
| C | -5.22802500 | -1.58725900 | -0.51617900 |
| H | -3.14613900 | -2.14831200 | -0.71087000 |
| C | -5.63732200 | 0.69058400  | 0.13105200  |
| C | -6.12137700 | -0.56734700 | -0.20425800 |
| H | -5.60036800 | -2.57249300 | -0.77759400 |
| H | -6.31383000 | 1.50016900  | 0.38208200  |
| H | -7.19085800 | -0.74828900 | -0.21873900 |
| C | -3.82673600 | 2.25641300  | 0.50809600  |
| N | -3.57625100 | 3.34353700  | 0.81529400  |
| N | 3.21010100  | 0.36017900  | 0.10784100  |
| H | 4.15039400  | -0.00834600 | 0.12031000  |
| C | 3.08670900  | 1.77238500  | 0.01256500  |
| C | 1.97220300  | 2.44998200  | 0.50700200  |
| C | 4.13851100  | 2.47635100  | -0.57562100 |
| C | 1.90523900  | 3.83354400  | 0.37183100  |
| H | 1.16169000  | 1.92813000  | 1.00120200  |
| C | 4.06888700  | 3.85924400  | -0.68215400 |
| H | 5.00031300  | 1.93748600  | -0.96020700 |
| C | 2.94694700  | 4.54198800  | -0.21784900 |
| H | 1.02519400  | 4.35081800  | 0.73842000  |
| H | 4.88855200  | 4.40076800  | -1.14247200 |
| H | 2.88591500  | 5.62032400  | -0.31596600 |

E(M06-2X-D3/6-31G(d,p)) = -1120.60871236 A.U.

|                                          |                             |
|------------------------------------------|-----------------------------|
| Zero-point correction=                   | 0.322145 (Hartree/Particle) |
| Thermal correction to Energy=            | 0.385342                    |
| Thermal correction to Enthalpy=          | 0.387031                    |
| Thermal correction to Gibbs Free Energy= | 0.196924                    |

E(M06-2X-D3/6-311+G(d,p)) = -1120.87546184 A.U.



**INT2-4**

|   |             |             |             |
|---|-------------|-------------|-------------|
| C | -5.13131100 | -0.61639100 | -0.52383200 |
| C | -5.16190800 | 0.73117400  | -0.16089200 |
| C | -3.99750600 | 1.39981300  | 0.22716200  |
| C | -2.82039500 | 0.67528000  | 0.23643100  |
| C | -2.78693000 | -0.66970300 | -0.12572600 |
| C | -3.93586400 | -1.34076000 | -0.51107500 |
| H | -6.05114600 | -1.11031100 | -0.81886200 |
| H | -6.10668600 | 1.26443100  | -0.17952400 |
| H | -4.00557400 | 2.44598100  | 0.51466700  |
| H | -3.93305900 | -2.39016100 | -0.79358600 |
| C | -1.41857500 | 1.03774400  | 0.58156000  |
| N | -1.04413400 | 2.19785000  | 0.95861100  |
| C | -1.35421700 | -1.06099800 | 0.02385900  |
| N | -0.59082000 | -0.08138600 | 0.42982400  |
| H | 0.11116600  | 2.31885200  | 3.09777700  |
| N | 0.84374600  | 2.42976200  | 2.39272300  |
| C | 0.33779400  | 2.34061200  | 1.23401400  |
| C | 1.21658500  | 2.47126300  | 0.03515900  |
| C | 0.79605300  | 3.22396900  | -1.06013800 |
| C | 2.47374000  | 1.85024900  | -0.01286500 |
| C | 1.62009200  | 3.38923600  | -2.16846300 |
| H | -0.18502100 | 3.68639100  | -1.02606400 |
| C | 3.29534100  | 2.00660600  | -1.13370300 |
| C | 2.87274200  | 2.78311600  | -2.20501400 |
| H | 1.28298300  | 3.99098800  | -3.00617200 |
| H | 4.25689900  | 1.50542600  | -1.15592000 |
| H | 3.51641300  | 2.90446900  | -3.06963000 |
| C | 2.93907500  | 0.97331000  | 1.03249100  |
| N | 3.38177200  | 0.21315100  | 1.78479200  |
| N | -0.94713900 | -2.31175500 | -0.24681700 |
| H | -1.65812500 | -2.93903500 | -0.59418400 |
| C | 0.35014600  | -2.86721400 | -0.14826300 |
| C | 1.40192100  | -2.22596400 | 0.51048000  |
| C | 0.54452600  | -4.12444400 | -0.72863100 |
| C | 2.64271100  | -2.85317200 | 0.57027300  |
| H | 1.25668500  | -1.25709500 | 0.96655100  |
| C | 1.78749500  | -4.73787300 | -0.65645400 |
| H | -0.27860100 | -4.61736600 | -1.24079200 |
| C | 2.84467000  | -4.10289800 | -0.00798700 |
| H | 3.44829200  | -2.33886800 | 1.08461600  |
| H | 1.92805300  | -5.71335700 | -1.11065700 |
| H | 3.81663900  | -4.58143100 | 0.04752300  |

E(M06-2X-D3/6-31G(d,p)) = -1120.68921687 A.U.

Zero-point correction= 0.326959 (Hartree/Particle)  
Thermal correction to Energy= 0.389707  
Thermal correction to Enthalpy= 0.391395  
Thermal correction to Gibbs Free Energy= 0.201707

E(M06-2X-D3/6-311+G(d,p)) = -1120.95512225 A.U.

### TS1-5

|   |             |             |             |
|---|-------------|-------------|-------------|
| C | -3.56599200 | -1.96172800 | 0.15247800  |
| C | -2.18475800 | -1.78909000 | 0.16214500  |
| C | -1.69218300 | -0.49227000 | 0.05510300  |
| C | -2.55332200 | 0.61208300  | -0.04915900 |
| C | -3.92988100 | 0.43355200  | -0.06047500 |
| C | -4.42616800 | -0.86346000 | 0.04003100  |
| N | -0.33660700 | 1.31449100  | -0.02758500 |
| C | -0.29479200 | 0.01740700  | 0.02570000  |
| H | -3.98159600 | -2.96018000 | 0.23669400  |
| H | -1.53085600 | -2.65180700 | 0.26092000  |
| H | -4.58882100 | 1.29124400  | -0.14392400 |
| H | -5.49848000 | -1.03042900 | 0.03374000  |
| C | -1.71306600 | 1.82782400  | -0.14098300 |
| C | 2.14101200  | -0.46029900 | 0.03421300  |
| C | 2.59498900  | 0.80103800  | 0.42461100  |
| C | 3.05561900  | -1.44171000 | -0.35706400 |
| C | 3.96050400  | 1.06817200  | 0.40311100  |
| H | 1.89645600  | 1.55731400  | 0.75574500  |
| C | 4.41527400  | -1.16241400 | -0.36543600 |
| H | 2.69623600  | -2.42075100 | -0.66322400 |
| C | 4.87561100  | 0.09736800  | 0.00970600  |
| H | 4.30718400  | 2.05029400  | 0.70718000  |
| H | 5.11535900  | -1.93197800 | -0.67354200 |
| H | 5.93716100  | 0.31823600  | -0.00259200 |
| N | 0.77460400  | -0.80651900 | 0.04541400  |
| H | 0.56760900  | -1.79172900 | -0.03008000 |
| N | -1.69956800 | 3.05980400  | -0.33963800 |
| H | -0.18632000 | 2.47651100  | -0.23214400 |

E(M06-2X-D3/6-31G(d,p)) = -703.982225528 A.U.

Zero-point correction= 0.217079 (Hartree/Particle)  
Thermal correction to Energy= 0.256298

Thermal correction to Enthalpy= 0.257986  
 Thermal correction to Gibbs Free Energy= 0.124886

E(M06-2X-D3/6-311+G(d,p)) = -704.149778577 A.U.

**TS1-5H**

|   |             |             |             |
|---|-------------|-------------|-------------|
| C | -5.09172500 | 0.51204600  | 0.88938900  |
| C | -3.85300900 | 1.14036500  | 0.79519700  |
| C | -2.81675200 | 0.43287000  | 0.19576300  |
| C | -2.99839000 | -0.86458900 | -0.28815200 |
| C | -4.23117500 | -1.49180800 | -0.19089500 |
| C | -5.27669000 | -0.78696000 | 0.40069900  |
| N | -0.79892300 | -0.20144400 | -0.64478500 |
| C | -1.40381600 | 0.78834900  | -0.05972500 |
| H | -5.92335000 | 1.03302800  | 1.35157800  |
| H | -3.71950200 | 2.14453200  | 1.18883700  |
| H | -4.35450100 | -2.50115000 | -0.56913000 |
| H | -6.25399300 | -1.25023300 | 0.49136600  |
| C | -1.71192200 | -1.36336700 | -0.84272900 |
| N | -1.33848800 | -2.44071400 | -1.33983000 |
| H | 0.19785500  | -0.43157700 | -1.06784600 |
| N | 1.09297100  | -1.59177800 | -1.61023500 |
| H | 1.53549300  | -1.49516100 | -2.51860900 |
| H | -0.04358200 | -2.20004800 | -1.57149400 |
| C | 2.00812900  | -1.86270700 | -0.60113700 |
| C | 3.39581300  | -1.69439600 | -0.76057000 |
| C | 1.53596800  | -2.24885100 | 0.66998000  |
| C | 4.26676400  | -1.88754900 | 0.30580100  |
| H | 3.78100900  | -1.40058400 | -1.73407300 |
| C | 2.41558500  | -2.43028800 | 1.73036100  |
| H | 0.47014600  | -2.41696200 | 0.80165300  |
| C | 3.78735900  | -2.24670600 | 1.56408300  |
| H | 5.33387000  | -1.75318400 | 0.14993600  |
| H | 2.02313900  | -2.72821500 | 2.69856100  |
| H | 4.47016600  | -2.39317600 | 2.39378000  |
| C | 0.50219500  | 2.33737300  | 0.11192900  |
| C | 0.79724600  | 3.64665200  | -0.26587000 |
| C | 1.52588500  | 1.42003200  | 0.35128900  |
| C | 2.12357300  | 4.03610000  | -0.41294800 |
| H | -0.00927700 | 4.34967400  | -0.45456500 |
| C | 2.84845300  | 1.81641200  | 0.18059800  |
| H | 1.30777300  | 0.40955700  | 0.68205400  |
| C | 3.15172000  | 3.12066000  | -0.20012600 |

|   |             |            |             |
|---|-------------|------------|-------------|
| H | 2.35136100  | 5.05573900 | -0.70572700 |
| H | 3.63339900  | 1.08771200 | 0.35592500  |
| H | 4.18496000  | 3.42542700 | -0.32717200 |
| N | -0.86143000 | 1.96876200 | 0.27813100  |
| H | -1.49515700 | 2.67901200 | 0.61433000  |

E(M06-2X-D3/6-31G(d,p)) = -991.535552214 A.U.

|                                          |                             |
|------------------------------------------|-----------------------------|
| Zero-point correction=                   | 0.336469 (Hartree/Particle) |
| Thermal correction to Energy=            | 0.395269                    |
| Thermal correction to Enthalpy=          | 0.396957                    |
| Thermal correction to Gibbs Free Energy= | 0.220395                    |

E(M06-2X-D3/6-311+G(d,p)) = -991.770486809 A.U.

### INT1-5

|   |             |             |             |
|---|-------------|-------------|-------------|
| C | -3.52977700 | -2.01505400 | -0.00011200 |
| C | -2.14291100 | -1.84796500 | -0.00011700 |
| C | -1.65558500 | -0.54958200 | -0.00009000 |
| C | -2.51374600 | 0.54596400  | -0.00004100 |
| C | -3.88788500 | 0.39023600  | 0.00003000  |
| C | -4.38872100 | -0.91350200 | -0.00002400 |
| N | -0.29006400 | 1.34980000  | 0.00023700  |
| C | -0.28961300 | 0.04894100  | 0.00002000  |
| H | -3.94665400 | -3.01682600 | -0.00016900 |
| H | -1.49176900 | -2.71823500 | -0.00025300 |
| H | -4.53959200 | 1.25745100  | 0.00005700  |
| H | -5.46131800 | -1.07823600 | 0.00001200  |
| C | -1.64634500 | 1.75708200  | 0.00003900  |
| C | 2.16620600  | -0.40624900 | -0.00004800 |
| C | 2.62229100  | 0.91544200  | -0.00034300 |
| C | 3.08617100  | -1.46093200 | 0.00024000  |
| C | 3.99361000  | 1.15561800  | -0.00031100 |
| H | 1.90848300  | 1.72680100  | -0.00052600 |
| C | 4.44924400  | -1.20165400 | 0.00025300  |
| H | 2.72795100  | -2.48769800 | 0.00043000  |
| C | 4.91266100  | 0.11177300  | -0.00000700 |
| H | 4.34271900  | 2.18332400  | -0.00052000 |
| H | 5.14938100  | -2.03067600 | 0.00047700  |
| H | 5.97761300  | 0.31697100  | 0.00006200  |
| N | 0.80133000  | -0.75054700 | -0.00003000 |
| H | 0.61051900  | -1.74157600 | 0.00030000  |
| N | -2.08801800 | 2.94597500  | 0.00020800  |

H -1.29367700 3.59139200 0.00030000

E(M06-2X-D3/6-31G(d,p)) = -704.094939996 A.U.

Zero-point correction= 0.223964 (Hartree/Particle)

Thermal correction to Energy= 0.263019

Thermal correction to Enthalpy= 0.264708

Thermal correction to Gibbs Free Energy= 0.133287

E(M06-2X-D3/6-311+G(d,p)) = -704.262018635 A.U.

### TS2-5

|   |             |             |             |
|---|-------------|-------------|-------------|
| C | -0.36218100 | 3.73241000  | -0.44336300 |
| C | 0.83037600  | 3.02628500  | -0.27185500 |
| C | 0.76142500  | 1.64480000  | -0.24034200 |
| C | -0.45304200 | 0.95822200  | -0.35974200 |
| C | -1.63369900 | 1.65943800  | -0.56283600 |
| C | -1.56999800 | 3.05549700  | -0.59689500 |
| N | 1.29984800  | -0.62166600 | -0.21356800 |
| C | 1.79668500  | 0.58466600  | -0.15345500 |
| H | -0.34583500 | 4.81658300  | -0.47208700 |
| H | 1.77101800  | 3.56202600  | -0.17669300 |
| H | -2.58299200 | 1.15997000  | -0.70805700 |
| H | -2.48270100 | 3.62114700  | -0.75158300 |
| C | -0.08005000 | -0.48182300 | -0.29065400 |
| H | -0.68403200 | -2.54103900 | -0.93485700 |
| N | 3.10046900  | 0.89637400  | -0.03878700 |
| H | 3.30823700  | 1.88342600  | 0.00533200  |
| C | 4.22585000  | 0.04973600  | 0.03786500  |
| C | 5.47609000  | 0.67273900  | 0.11595000  |
| C | 4.13597000  | -1.34510700 | 0.04010700  |
| C | 6.63230100  | -0.08975100 | 0.19468200  |
| H | 5.53925000  | 1.75837200  | 0.11431900  |
| C | 5.30750100  | -2.09277200 | 0.11914000  |
| H | 3.16808000  | -1.82264400 | -0.01852800 |
| C | 6.55403800  | -1.48036500 | 0.19554800  |
| H | 7.59559900  | 0.40589300  | 0.25556700  |
| H | 5.23505700  | -3.17547100 | 0.12086100  |
| H | 7.45663500  | -2.07869600 | 0.25515700  |
| N | -0.81506900 | -1.54747200 | -0.27562100 |
| C | -2.18903500 | -1.82322900 | -0.76700300 |
| N | -2.05990700 | -2.78280500 | -1.55775800 |
| C | -3.41120500 | -1.14260900 | -0.27940500 |

|   |             |             |             |
|---|-------------|-------------|-------------|
| C | -4.52298900 | -1.15258600 | -1.12638400 |
| C | -3.54156200 | -0.55653200 | 0.99259800  |
| C | -5.72255900 | -0.57314100 | -0.73606100 |
| H | -4.41002200 | -1.63495900 | -2.09169500 |
| C | -4.75656000 | 0.01996600  | 1.38645600  |
| C | -2.44899400 | -0.50728200 | 1.92977300  |
| C | -5.84153800 | 0.01718100  | 0.52261400  |
| H | -6.57085200 | -0.58408100 | -1.41253200 |
| H | -4.83236800 | 0.46299900  | 2.37351800  |
| N | -1.59783900 | -0.42379200 | 2.70988000  |
| H | -6.77855200 | 0.46754000  | 0.83184300  |

E(M06-2X-D3/6-31G(d,p)) = -1120.58957470 A.U.

|                                          |                             |
|------------------------------------------|-----------------------------|
| Zero-point correction=                   | 0.320690 (Hartree/Particle) |
| Thermal correction to Energy=            | 0.383352                    |
| Thermal correction to Enthalpy=          | 0.385041                    |
| Thermal correction to Gibbs Free Energy= | 0.197844                    |

E(M06-2X-D3/6-311+G(d,p)) = -1120.85495607 A.U.

## INT2-5

|   |             |             |             |
|---|-------------|-------------|-------------|
| C | 0.01188300  | 3.99483300  | -0.66930700 |
| C | -1.07010700 | 3.11214400  | -0.61390100 |
| C | -0.85063800 | 1.86419800  | -0.05797400 |
| C | 0.39868200  | 1.48519700  | 0.43171900  |
| C | 1.47581000  | 2.35668500  | 0.37830200  |
| C | 1.26197700  | 3.62097700  | -0.18121900 |
| N | -1.10647300 | -0.32278500 | 0.72730900  |
| C | -1.72310900 | 0.67849900  | 0.16866700  |
| H | -0.12290600 | 4.98177200  | -1.09920300 |
| H | -2.03827700 | 3.41451500  | -1.00404400 |
| H | 2.45121900  | 2.08306200  | 0.76443300  |
| H | 2.08645100  | 4.32422400  | -0.23448300 |
| C | 0.22538500  | 0.06311700  | 0.89437100  |
| H | 2.12807400  | 0.39688600  | 3.16363500  |
| N | -3.02276400 | 0.71004400  | -0.18190100 |
| H | -3.33627400 | 1.56854400  | -0.61046600 |
| C | -4.00645900 | -0.29389100 | -0.07257700 |
| C | -5.29776000 | 0.04345500  | -0.49194800 |
| C | -3.74189400 | -1.57521200 | 0.41969500  |
| C | -6.32175300 | -0.89003000 | -0.42266100 |
| H | -5.49633100 | 1.04195200  | -0.87443600 |

|   |             |             |             |
|---|-------------|-------------|-------------|
| C | -4.78259000 | -2.49765800 | 0.48171900  |
| H | -2.74156000 | -1.83117100 | 0.73995800  |
| C | -6.06900300 | -2.16926500 | 0.06644400  |
| H | -7.31834700 | -0.61474400 | -0.75182700 |
| H | -4.57488600 | -3.49235900 | 0.86294700  |
| H | -6.86735100 | -2.90135200 | 0.12297800  |
| N | 1.09960200  | -0.76925100 | 1.30311900  |
| C | 2.42974500  | -0.40264300 | 1.48879100  |
| N | 2.89621500  | 0.17899700  | 2.52508900  |
| C | 3.40208600  | -0.87438200 | 0.44697400  |
| C | 4.72647000  | -1.07096500 | 0.84528800  |
| C | 3.06782000  | -1.11676700 | -0.89794200 |
| C | 5.69205400  | -1.50856500 | -0.05124700 |
| H | 4.97056000  | -0.86916200 | 1.88198100  |
| C | 4.04654900  | -1.55450000 | -1.80092900 |
| C | 1.75868200  | -0.89110400 | -1.46131600 |
| C | 5.35190000  | -1.75615900 | -1.37936300 |
| H | 6.71136800  | -1.66064200 | 0.28824700  |
| H | 3.76385600  | -1.72851900 | -2.83337300 |
| N | 0.75779500  | -0.69952600 | -2.01093200 |
| H | 6.09939600  | -2.10315100 | -2.08465300 |

E(M06-2X-D3/6-31G(d,p)) = -1120.68467387 A.U.

|                                          |                             |
|------------------------------------------|-----------------------------|
| Zero-point correction=                   | 0.326702 (Hartree/Particle) |
| Thermal correction to Energy=            | 0.389427                    |
| Thermal correction to Enthalpy=          | 0.391116                    |
| Thermal correction to Gibbs Free Energy= | 0.204264                    |

E(M06-2X-D3/6-311+G(d,p)) = -1120.95008162 A.U.

### TS2-6

|   |             |             |             |
|---|-------------|-------------|-------------|
| C | -4.61587200 | 1.39433400  | -1.22065400 |
| C | -3.22734900 | 1.48927200  | -1.21350400 |
| C | -2.53044700 | 0.65484100  | -0.34789200 |
| C | -3.18899100 | -0.23441100 | 0.49925600  |
| C | -4.57224600 | -0.31618100 | 0.50974100  |
| C | -5.27793300 | 0.50360000  | -0.36832500 |
| N | -0.87096300 | -0.44309100 | 0.77494700  |
| C | -1.08692000 | 0.52595800  | -0.07903200 |
| H | -5.19300200 | 2.02042400  | -1.89239000 |
| H | -2.72617400 | 2.18986600  | -1.87575800 |
| H | -5.06906000 | -1.00363700 | 1.18582700  |

|   |             |             |             |
|---|-------------|-------------|-------------|
| H | -6.36180500 | 0.45626600  | -0.39214600 |
| C | -2.19520500 | -0.94598100 | 1.33589100  |
| N | -2.25727500 | -1.69666900 | 2.31679700  |
| H | -1.01320300 | -1.81922700 | 2.57054200  |
| N | -0.17031300 | 1.34261600  | -0.62220400 |
| H | -0.49260400 | 1.91308300  | -1.39166900 |
| N | 0.29386800  | -1.80054300 | 2.30998500  |
| C | 0.33502100  | -1.19361300 | 1.22505400  |
| C | 1.46121100  | -1.27491700 | 0.23564500  |
| C | 1.30843700  | -1.47752500 | -1.14703300 |
| C | 2.75620600  | -1.24086000 | 0.75746000  |
| C | 2.43099200  | -1.60966500 | -1.97831900 |
| C | 3.86592000  | -1.36031200 | -0.06625100 |
| H | 2.85867400  | -1.12263000 | 1.83109800  |
| C | 3.70655900  | -1.53983300 | -1.44115000 |
| H | 2.28177300  | -1.77725400 | -3.03984200 |
| H | 4.86172600  | -1.31468900 | 0.36323900  |
| H | 4.57206200  | -1.63726400 | -2.08775900 |
| C | 0.01418400  | -1.56783500 | -1.77331100 |
| N | -1.00767400 | -1.61708600 | -2.31686300 |
| C | 1.11626000  | 1.64628600  | -0.08851900 |
| C | 2.18564200  | 1.81965200  | -0.96271800 |
| C | 1.28559300  | 1.79281800  | 1.28800300  |
| C | 3.44031900  | 2.13322600  | -0.45263400 |
| H | 2.03616500  | 1.67606700  | -2.02873200 |
| C | 2.54839800  | 2.09126700  | 1.78642600  |
| H | 0.44363300  | 1.65540200  | 1.95882200  |
| C | 3.62632400  | 2.26302800  | 0.92146800  |
| H | 4.27660000  | 2.25796800  | -1.13245300 |
| H | 2.68613300  | 2.19381400  | 2.85759300  |
| H | 4.60897300  | 2.49632100  | 1.31740200  |

E(M06-2X-D3/6-31G(d,p)) = -1120.61109536 A.U.

Zero-point correction= 0.319600 (Hartree/Particle)  
 Thermal correction to Energy= 0.382051  
 Thermal correction to Enthalpy= 0.383740  
 Thermal correction to Gibbs Free Energy= 0.201004

E(M06-2X-D3/6-311+G(d,p)) = -1120.87901930 A.U.

## INT2-6

|   |            |            |            |
|---|------------|------------|------------|
| C | 4.30348300 | 2.03812500 | 0.81536500 |
|---|------------|------------|------------|



|   |             |             |             |
|---|-------------|-------------|-------------|
| C | 2.95280600  | 1.86326400  | 0.53033300  |
| C | 2.47462600  | 0.66247100  | 0.00449000  |
| C | 3.39014800  | -0.37607900 | -0.24839800 |
| C | 4.74401600  | -0.19800300 | 0.04739000  |
| C | 5.20000800  | 1.00251600  | 0.57979200  |
| N | 0.70395200  | -0.27867300 | -1.26366600 |
| C | 1.02137500  | 0.50006900  | -0.29817500 |
| H | 4.65270600  | 2.98487700  | 1.21338800  |
| H | 2.25932700  | 2.68325600  | 0.68665200  |
| H | 5.43100600  | -1.01488500 | -0.14362000 |
| H | 6.25415500  | 1.12728100  | 0.80252800  |
| C | 3.02036800  | -1.65498600 | -0.80461400 |
| N | 2.86681500  | -2.71295500 | -1.24656500 |
| H | -0.24446300 | -0.40970900 | -3.40024300 |
| N | 0.19016400  | 1.23570100  | 0.52033200  |
| H | 0.55742700  | 1.43835300  | 1.43993200  |
| N | -0.98792700 | -0.76562600 | -2.79510200 |
| C | -0.57964100 | -0.71976300 | -1.58794000 |
| C | -1.51951000 | -1.22364200 | -0.52567700 |
| C | -1.14380600 | -1.70407500 | 0.74126900  |
| C | -2.88329200 | -1.17882000 | -0.83125100 |
| C | -2.11878800 | -2.11318300 | 1.66367700  |
| C | -3.84524900 | -1.57457400 | 0.08678700  |
| H | -3.16305400 | -0.81272900 | -1.81193800 |
| C | -3.46499000 | -2.04205100 | 1.34296500  |
| H | -1.79629700 | -2.48519100 | 2.63019300  |
| H | -4.89597900 | -1.51538400 | -0.17794600 |
| H | -4.21063500 | -2.35468700 | 2.06619400  |
| C | 0.21560400  | -1.79119800 | 1.21209300  |
| N | 1.26089800  | -1.85650800 | 1.70681200  |
| C | -1.15040100 | 1.60976600  | 0.27583900  |
| C | -2.07331400 | 1.56126400  | 1.32156800  |
| C | -1.54572700 | 2.04991800  | -0.98859900 |
| C | -3.39140900 | 1.94064200  | 1.09851800  |
| H | -1.75785400 | 1.19668700  | 2.29527700  |
| C | -2.87218900 | 2.40440600  | -1.20642900 |
| H | -0.81930000 | 2.09326600  | -1.79369700 |
| C | -3.79883700 | 2.35332400  | -0.16806600 |
| H | -4.10546000 | 1.89395800  | 1.91432500  |
| H | -3.17911600 | 2.73041300  | -2.19472600 |
| H | -4.83146400 | 2.63456700  | -0.34462200 |

E(M06-2X-D3/6-31G(d,p)) = -1120.67103116 A.U.

|                                          |                             |
|------------------------------------------|-----------------------------|
| Zero-point correction=                   | 0.324613 (Hartree/Particle) |
| Thermal correction to Energy=            | 0.388751                    |
| Thermal correction to Enthalpy=          | 0.390439                    |
| Thermal correction to Gibbs Free Energy= | 0.203710                    |

E(M06-2X-D3/6-311+G(d,p)) = -1120.94072731 A.U.

### INT1-6

|   |             |             |             |
|---|-------------|-------------|-------------|
| C | 1.33364700  | 2.58914300  | -0.44731200 |
| C | 0.47433100  | 1.48815800  | -0.42833700 |
| C | 1.03166700  | 0.24244100  | -0.16374900 |
| C | 2.40480500  | 0.10403300  | 0.03931900  |
| C | 3.26115800  | 1.18971400  | 0.02216400  |
| C | 2.70343300  | 2.44674100  | -0.21706500 |
| N | 1.44695800  | -2.05175700 | 0.08061900  |
| C | 0.51758500  | -1.16119100 | -0.10463700 |
| H | 0.92617700  | 3.57490700  | -0.64726200 |
| H | -0.58530900 | 1.61656200  | -0.61678500 |
| H | 4.32552700  | 1.05019800  | 0.17971700  |
| H | 3.34065700  | 3.32503700  | -0.23649400 |
| C | 2.66974700  | -1.35271000 | 0.19391500  |
| C | -1.92759400 | -0.75321700 | -0.07571400 |
| C | -3.02235100 | -0.88891600 | -0.93045400 |
| C | -2.00219200 | 0.11004000  | 1.02023300  |
| C | -4.18084200 | -0.15653300 | -0.69584000 |
| H | -2.95054100 | -1.56097300 | -1.78003800 |
| C | -3.15372000 | 0.86082400  | 1.23006600  |
| H | -1.15907000 | 0.18598700  | 1.69976000  |
| C | -4.24716800 | 0.72805000  | 0.37774000  |
| H | -5.02877000 | -0.26809600 | -1.36366400 |
| H | -3.20227200 | 1.53630300  | 2.07791800  |
| H | -5.14844400 | 1.30549700  | 0.55364600  |
| N | -0.77170000 | -1.53427100 | -0.31335300 |
| H | -0.89317100 | -2.53709000 | -0.38208200 |
| N | 3.82035500  | -1.84843700 | 0.39552300  |
| H | 3.73088600  | -2.86653200 | 0.45377900  |

E(M06-2X-D3/6-31G(d,p)) = -704.090955082 A.U.

|                                          |                             |
|------------------------------------------|-----------------------------|
| Zero-point correction=                   | 0.223755 (Hartree/Particle) |
| Thermal correction to Energy=            | 0.262795                    |
| Thermal correction to Enthalpy=          | 0.264483                    |
| Thermal correction to Gibbs Free Energy= | 0.131755                    |

$$E(\text{M06-2X-D3/6-311+G(d,p)}) = -704.258691275 \quad \text{A.U.}$$

**TS1-7**

|   |             |             |             |
|---|-------------|-------------|-------------|
| C | 1.97831100  | 2.60236200  | -0.32560300 |
| C | 0.89516400  | 1.72683700  | -0.24185000 |
| C | 1.17527800  | 0.37864300  | -0.05855200 |
| C | 2.49545700  | -0.08836600 | 0.01731600  |
| C | 3.56928400  | 0.77927900  | -0.06417300 |
| C | 3.29255900  | 2.13753500  | -0.23154400 |
| N | 1.13321900  | -1.93748300 | 0.15575000  |
| C | 0.35884200  | -0.84515000 | 0.03184700  |
| H | 1.79641600  | 3.66230200  | -0.46852400 |
| H | -0.12372100 | 2.08856900  | -0.32616800 |
| H | 4.58301300  | 0.39759500  | -0.00478900 |
| H | 4.11097700  | 2.84728100  | -0.29840200 |
| C | 2.48161600  | -1.58224300 | 0.14839600  |
| C | -2.07595200 | -0.58552700 | 0.01585800  |
| C | -3.18995300 | -1.11027600 | -0.64692000 |
| C | -2.20497500 | 0.60467200  | 0.74292000  |
| C | -4.40372000 | -0.43562900 | -0.60957800 |
| H | -3.08094500 | -2.04221100 | -1.19165100 |
| C | -3.42087200 | 1.27847500  | 0.76460000  |
| H | -1.35726300 | 0.97543800  | 1.31173600  |
| C | -4.52420400 | 0.76483600  | 0.08772800  |
| H | -5.26107600 | -0.84941800 | -1.13086600 |
| H | -3.50985400 | 2.20071300  | 1.33021500  |
| H | -5.47324800 | 1.28939000  | 0.11358200  |
| N | -0.87234500 | -1.29255400 | -0.03059900 |
| H | -0.10480500 | -2.42223200 | 0.09304100  |
| N | 3.53497000  | -2.28761900 | 0.22998300  |
| H | 3.28858900  | -3.27652000 | 0.30322400  |

$$E(\text{M06-2X-D3/6-31G(d,p)}) = -704.019608320 \quad \text{A.U.}$$

|                                          |                             |
|------------------------------------------|-----------------------------|
| Zero-point correction=                   | 0.218014 (Hartree/Particle) |
| Thermal correction to Energy=            | 0.256553                    |
| Thermal correction to Enthalpy=          | 0.258242                    |
| Thermal correction to Gibbs Free Energy= | 0.127816                    |

$$E(\text{M06-2X-D3/6-311+G(d,p)}) = -704.184919874 \quad \text{A.U.}$$

**TS1-7H**

|   |             |             |             |
|---|-------------|-------------|-------------|
| C | -4.00420900 | -0.99290200 | 1.14444600  |
| C | -2.94647900 | -0.23109000 | 0.64475400  |
| C | -1.88523600 | -0.91012900 | 0.05201100  |
| C | -1.88170500 | -2.30301000 | -0.00864900 |
| C | -2.92716200 | -3.06402100 | 0.48359800  |
| C | -4.00139700 | -2.38719400 | 1.06038400  |
| N | 0.13641600  | -1.58115000 | -0.91575700 |
| C | -0.57881800 | -0.48833500 | -0.55237000 |
| H | -4.84491100 | -0.48908300 | 1.61060100  |
| H | -2.96404100 | 0.84914000  | 0.72712800  |
| H | -2.88849700 | -4.14648300 | 0.42042200  |
| H | -4.84239800 | -2.94664900 | 1.45828900  |
| C | -0.59508000 | -2.72914100 | -0.62385800 |
| C | -0.82320000 | 1.87634700  | -0.42021800 |
| C | -0.43598700 | 2.70168000  | 0.63921600  |
| C | -1.90878200 | 2.25377500  | -1.21917700 |
| C | -1.14435500 | 3.86614400  | 0.91663800  |
| H | 0.41694800  | 2.40632600  | 1.24280700  |
| C | -2.61492700 | 3.41819300  | -0.93619900 |
| H | -2.19453600 | 1.61579800  | -2.05021400 |
| C | -2.23899300 | 4.22722600  | 0.13427300  |
| H | -0.84153300 | 4.49254800  | 1.74986900  |
| H | -3.46172100 | 3.69578600  | -1.55622400 |
| H | -2.79075200 | 5.13539600  | 0.35284800  |
| N | -0.07990700 | 0.71493200  | -0.70485100 |
| N | -0.28688100 | -3.95157900 | -0.81110400 |
| H | 0.64225400  | -4.00463800 | -1.23526700 |
| H | 1.30768000  | 0.51979800  | -1.24292800 |
| N | 2.17987200  | -0.17493600 | -1.50237300 |
| H | 2.53098200  | -0.04776800 | -2.44760300 |
| H | 1.49227900  | -1.06838100 | -1.38839400 |
| C | 3.20889700  | -0.12400700 | -0.50129000 |
| C | 4.52078000  | 0.19882900  | -0.83097300 |
| C | 2.85008000  | -0.38699300 | 0.82039900  |
| C | 5.48521800  | 0.25825600  | 0.17098900  |
| H | 4.78676400  | 0.40432100  | -1.86438200 |
| C | 3.82170500  | -0.32372100 | 1.81286300  |
| H | 1.82176000  | -0.64787100 | 1.05192900  |
| C | 5.13884100  | -0.00069900 | 1.49344300  |
| H | 6.50910000  | 0.50888900  | -0.08614900 |
| H | 3.54683100  | -0.53128300 | 2.84176500  |
| H | 5.89215100  | 0.04803400  | 2.27242500  |

E(M06-2X-D3/6-31G(d,p)) = -991.569884717 A.U.

Zero-point correction= 0.339234 (Hartree/Particle)  
Thermal correction to Energy= 0.397055  
Thermal correction to Enthalpy= 0.398743  
Thermal correction to Gibbs Free Energy= 0.222844

E(M06-2X-D3/6-311+G(d,p)) = -991.805059177 A.U.

### INT1-7

|   |             |             |             |
|---|-------------|-------------|-------------|
| C | 0.94176300  | 2.62262600  | 0.00006900  |
| C | 0.20255900  | 1.43940400  | -0.00003000 |
| C | 0.90677800  | 0.23834300  | -0.00007200 |
| C | 2.30278400  | 0.23642900  | 0.00000100  |
| C | 3.04138800  | 1.40745900  | 0.00013500  |
| C | 2.33902200  | 2.61078900  | 0.00016600  |
| C | 0.45989300  | -1.18701100 | -0.00012000 |
| H | 0.41743100  | 3.57264400  | 0.00008200  |
| H | -0.88069400 | 1.46551700  | -0.00015400 |
| H | 4.12539500  | 1.36687800  | 0.00019800  |
| H | 2.88068600  | 3.55113200  | 0.00026400  |
| C | 2.79210500  | -1.16330700 | -0.00003500 |
| C | -1.83671100 | -0.94344700 | -0.00000300 |
| C | -2.42739900 | -0.56112900 | 1.20766500  |
| C | -2.42712600 | -0.56075700 | -1.20766200 |
| C | -3.57527700 | 0.22491700  | 1.20314600  |
| H | -1.96922600 | -0.87831100 | 2.13905000  |
| C | -3.57502100 | 0.22531700  | -1.20315800 |
| H | -1.96872700 | -0.87759200 | -2.13905300 |
| C | -4.15131400 | 0.62649900  | -0.00002100 |
| H | -4.02036700 | 0.52660700  | 2.14629900  |
| H | -4.01986700 | 0.52727900  | -2.14634100 |
| H | -5.04609400 | 1.23976500  | -0.00000100 |
| N | -0.67936200 | -1.74945000 | 0.00000700  |
| N | 4.01552800  | -1.50299200 | 0.00005000  |
| H | 4.12433800  | -2.51830400 | 0.00001300  |
| N | 1.63399100  | -1.93718100 | -0.00016700 |
| H | 1.60535000  | -2.94506500 | -0.00006700 |

E(M06-2X-D3/6-31G(d,p)) = -704.098109580 A.U.

Zero-point correction= 0.223269 (Hartree/Particle)  
Thermal correction to Energy= 0.262567

Thermal correction to Enthalpy= 0.264255  
 Thermal correction to Gibbs Free Energy= 0.131570

E(M06-2X-D3/6-311+G(d,p)) = -704.265523245 A.U.

### INT1-8

|   |             |             |             |
|---|-------------|-------------|-------------|
| C | 0.92514900  | 2.61431500  | 0.00338700  |
| C | 0.19652500  | 1.42420600  | 0.00219300  |
| C | 0.90729500  | 0.22782600  | 0.00044800  |
| C | 2.30492700  | 0.23177300  | 0.00031700  |
| C | 3.02946200  | 1.41245100  | 0.00137700  |
| C | 2.32089300  | 2.61260400  | 0.00286000  |
| C | 0.46243500  | -1.20138100 | -0.00107000 |
| H | 0.39345500  | 3.56008700  | 0.00471600  |
| H | -0.88680300 | 1.44211100  | 0.00265100  |
| H | 4.11559000  | 1.40667700  | 0.00118300  |
| H | 2.85824700  | 3.55521400  | 0.00369500  |
| C | 2.79038500  | -1.17660000 | -0.00079700 |
| C | -1.83475000 | -0.94703700 | -0.00081500 |
| C | -2.42802300 | -0.56721500 | 1.20667300  |
| C | -2.42079900 | -0.55635600 | -1.20853500 |
| C | -3.57114000 | 0.22584400  | 1.20222200  |
| H | -1.97504400 | -0.89202700 | 2.13795800  |
| C | -3.56393800 | 0.23656800  | -1.20395900 |
| H | -1.96188300 | -0.87256700 | -2.13990200 |
| C | -4.14106200 | 0.63675000  | -0.00075900 |
| H | -4.01768500 | 0.52525700  | 2.14545600  |
| H | -4.00464600 | 0.54468000  | -2.14713900 |
| H | -5.03228300 | 1.25519500  | -0.00070000 |
| N | -0.68128800 | -1.75652300 | -0.00105600 |
| N | 3.95492400  | -1.68246600 | -0.00053100 |
| H | 4.65724300  | -0.94331000 | 0.00057900  |
| N | 1.63346000  | -1.94282500 | -0.00255400 |
| H | 1.63998400  | -2.95111200 | -0.00076500 |

E(M06-2X-D3/6-31G(d,p)) = -704.098488209 A.U.

Zero-point correction= 0.223301 (Hartree/Particle)  
 Thermal correction to Energy= 0.262560  
 Thermal correction to Enthalpy= 0.264248  
 Thermal correction to Gibbs Free Energy= 0.131657

E(M06-2X-D3/6-311+G(d,p)) = -704.266071784 A.U.

**TS2-7**

|   |             |             |             |
|---|-------------|-------------|-------------|
| C | 2.76474400  | 2.97169300  | -0.32347200 |
| C | 2.97457700  | 1.59866600  | -0.17427900 |
| C | 1.85495100  | 0.77665000  | -0.11851000 |
| C | 0.57372400  | 1.32789000  | -0.21109500 |
| C | 0.35634200  | 2.68888800  | -0.34561900 |
| C | 1.48067500  | 3.51218800  | -0.40464500 |
| C | 1.68961900  | -0.70102700 | 0.07206300  |
| H | 3.62310200  | 3.63376200  | -0.36839200 |
| H | 3.97928900  | 1.19933700  | -0.10068500 |
| H | -0.64707100 | 3.10463300  | -0.38272200 |
| H | 1.35542700  | 4.58476400  | -0.50738300 |
| C | -0.39113400 | 0.21179500  | -0.10161700 |
| C | 3.89443200  | -1.36016400 | 0.15336700  |
| C | 4.54547600  | -1.33161200 | -1.08268500 |
| C | 4.61905100  | -1.13719200 | 1.32661600  |
| C | 5.90453800  | -1.04189900 | -1.14344400 |
| H | 3.97318800  | -1.52766500 | -1.98373700 |
| C | 5.97753300  | -0.84503300 | 1.25463900  |
| H | 4.10346000  | -1.18198400 | 2.28036300  |
| C | 6.62481200  | -0.78976200 | 0.02222600  |
| H | 6.40181500  | -1.01041100 | -2.10785000 |
| H | 6.53205100  | -0.65865600 | 2.16899400  |
| H | 7.68414500  | -0.56186600 | -0.02834300 |
| N | 2.51455800  | -1.65107300 | 0.21508600  |
| N | 0.30716600  | -0.92475500 | 0.08088900  |
| N | -1.68318600 | 0.27187000  | -0.16888900 |
| H | -2.05707300 | 1.20406700  | -0.30962000 |
| C | -2.58067300 | -1.15183700 | 0.07406300  |
| N | -1.98328700 | -2.18789400 | 0.23923600  |
| H | -0.25021900 | -1.80295300 | 0.19473300  |
| C | -4.03842100 | -0.84558500 | -0.02480000 |
| C | -4.69829200 | 0.37022500  | 0.23913000  |
| C | -4.83178500 | -1.94804100 | -0.36695000 |
| C | -6.09636000 | 0.46535400  | 0.14545600  |
| C | -6.21148600 | -1.85063800 | -0.46427800 |
| H | -4.31734900 | -2.88563700 | -0.54482900 |
| C | -6.85239500 | -0.63878100 | -0.20882300 |
| H | -6.57052600 | 1.41707800  | 0.35968800  |
| H | -6.79153800 | -2.72526100 | -0.74006700 |
| H | -7.93126500 | -0.55653700 | -0.28174900 |
| C | -4.01761100 | 1.57965500  | 0.61873100  |

N -3.48972800 2.57738800 0.88155700

E(M06-2X-D3/6-31G(d,p)) = -1120.64167715 A.U.

Zero-point correction= 0.322911 (Hartree/Particle)

Thermal correction to Energy= 0.385482

Thermal correction to Enthalpy= 0.387171

Thermal correction to Gibbs Free Energy= 0.198367

E(M06-2X-D3/6-311+G(d,p)) = -1120.90715695 A.U.

## INT2-7

|   |             |             |             |
|---|-------------|-------------|-------------|
| C | 2.55322100  | 2.96087800  | -0.23755900 |
| C | 2.87786100  | 1.60539500  | -0.11934500 |
| C | 1.83214700  | 0.69249000  | -0.06889300 |
| C | 0.50929400  | 1.13649400  | -0.13111300 |
| C | 0.17588800  | 2.47670100  | -0.23421200 |
| C | 1.22897700  | 3.39247800  | -0.29208600 |
| C | 1.74382900  | -0.80087300 | 0.10116300  |
| H | 3.35298200  | 3.69314100  | -0.28016100 |
| H | 3.91402200  | 1.29222600  | -0.06703500 |
| H | -0.85532100 | 2.82104300  | -0.24352600 |
| H | 1.01278300  | 4.45265500  | -0.37087800 |
| C | -0.31380400 | -0.09273200 | -0.01728200 |
| C | 3.99944000  | -1.28929200 | 0.11607800  |
| C | 4.59181100  | -1.13496400 | -1.14114700 |
| C | 4.76422900  | -1.10291800 | 1.27039100  |
| C | 5.92740000  | -0.75989500 | -1.23786600 |
| H | 3.99065000  | -1.30348500 | -2.02899800 |
| C | 6.09750000  | -0.72089700 | 1.16244300  |
| H | 4.29727200  | -1.24521500 | 2.23937700  |
| C | 6.68438400  | -0.54275700 | -0.08867400 |
| H | 6.37731900  | -0.63372300 | -2.21775100 |
| H | 6.68098500  | -0.56190900 | 2.06402900  |
| H | 7.72519900  | -0.24721200 | -0.16676900 |
| N | 2.65027200  | -1.68178200 | 0.21628900  |
| N | 0.37883900  | -1.17651500 | 0.13315800  |
| N | -1.67238200 | -0.02809200 | -0.07547800 |
| H | -2.04945200 | 0.88730300  | -0.26862100 |
| C | -2.55659400 | -1.10971900 | 0.08382500  |
| N | -2.22038800 | -2.31467300 | 0.28684100  |
| H | -1.20340700 | -2.41899300 | 0.31808900  |
| C | -4.02677100 | -0.79368200 | -0.02122800 |



|   |             |             |             |
|---|-------------|-------------|-------------|
| C | -4.63625300 | 0.46203700  | 0.17176700  |
| C | -4.86091500 | -1.87653500 | -0.31375200 |
| C | -6.02720600 | 0.61147600  | 0.07007000  |
| C | -6.23659500 | -1.72717500 | -0.41706200 |
| H | -4.38927900 | -2.84275400 | -0.44727800 |
| C | -6.82734300 | -0.47985300 | -0.22537000 |
| H | -6.46080300 | 1.59268600  | 0.22913700  |
| H | -6.85119200 | -2.59009500 | -0.65090600 |
| H | -7.90189400 | -0.35762700 | -0.30537100 |
| C | -3.89971700 | 1.66019000  | 0.48027500  |
| N | -3.31413500 | 2.63833000  | 0.68692300  |

E(M06-2X-D3/6-31G(d,p)) = -1120.68807244 A.U.

|                                          |                             |
|------------------------------------------|-----------------------------|
| Zero-point correction=                   | 0.327041 (Hartree/Particle) |
| Thermal correction to Energy=            | 0.389668                    |
| Thermal correction to Enthalpy=          | 0.391356                    |
| Thermal correction to Gibbs Free Energy= | 0.203943                    |

E(M06-2X-D3/6-311+G(d,p)) = -1120.95265091 A.U.

## INT2-8

|   |             |             |             |
|---|-------------|-------------|-------------|
| C | -2.84842400 | 2.93144700  | 0.76888900  |
| C | -3.06199900 | 1.59582400  | 0.41363600  |
| C | -1.94734000 | 0.80615800  | 0.16135600  |
| C | -0.66316300 | 1.34625100  | 0.26276400  |
| C | -0.44394100 | 2.66808200  | 0.61177900  |
| C | -1.56353200 | 3.46251000  | 0.86715800  |
| C | -1.74562600 | -0.63164200 | -0.23940700 |
| H | -3.70338200 | 3.56753200  | 0.97317000  |
| H | -4.06942500 | 1.20272400  | 0.34147300  |
| H | 0.55444300  | 3.09044000  | 0.68917600  |
| H | -1.43185500 | 4.50299800  | 1.14471000  |
| C | 0.25094700  | 0.22575500  | -0.07639300 |
| C | -3.95845800 | -1.27407000 | -0.32922900 |
| C | -4.59852100 | -1.45979900 | 0.89931300  |
| C | -4.69364600 | -0.84620600 | -1.43808200 |
| C | -5.95466200 | -1.17586400 | 1.02291700  |
| H | -4.01890600 | -1.81114400 | 1.74680600  |
| C | -6.04915400 | -0.56477700 | -1.30303500 |
| H | -4.18774900 | -0.72556300 | -2.39040100 |
| C | -6.68455400 | -0.72008400 | -0.07275000 |
| H | -6.44203200 | -1.31059200 | 1.98350100  |

|   |             |             |             |
|---|-------------|-------------|-------------|
| H | -6.61137400 | -0.22119500 | -2.16581500 |
| H | -7.74178100 | -0.49935600 | 0.02840400  |
| N | -2.58422000 | -1.55743800 | -0.46100000 |
| N | -0.35743500 | -0.88116700 | -0.35816400 |
| N | 1.60089900  | 0.39371200  | -0.08961600 |
| H | 1.95164000  | 1.28034300  | 0.24210800  |
| C | 2.56340200  | -0.61432400 | -0.33383800 |
| N | 2.35080700  | -1.83954100 | -0.55389900 |
| H | 1.35304900  | -2.06280700 | -0.52650700 |
| C | 3.95992200  | -0.08266700 | -0.33600400 |
| C | 5.00339200  | -0.81095800 | 0.25827700  |
| C | 4.25799000  | 1.12878500  | -0.96013500 |
| C | 6.31170200  | -0.31954000 | 0.22163200  |
| C | 5.56263400  | 1.61186700  | -1.00171100 |
| H | 3.46263100  | 1.68104100  | -1.45275100 |
| C | 6.59105200  | 0.88737900  | -0.40828900 |
| H | 7.10037000  | -0.89241900 | 0.69682600  |
| H | 5.77450800  | 2.54889400  | -1.50570000 |
| H | 7.60974800  | 1.25836000  | -0.43517700 |
| C | 4.77800700  | -2.04696100 | 0.96615900  |
| N | 4.70479900  | -3.01731700 | 1.59126900  |

E(M06-2X-D3/6-31G(d,p)) = -1120.68100659 A.U.

|                                          |                             |
|------------------------------------------|-----------------------------|
| Zero-point correction=                   | 0.326553 (Hartree/Particle) |
| Thermal correction to Energy=            | 0.389391                    |
| Thermal correction to Enthalpy=          | 0.391080                    |
| Thermal correction to Gibbs Free Energy= | 0.202923                    |

E(M06-2X-D3/6-311+G(d,p)) = -1120.94685121 A.U.

### TS2-9

|   |             |             |            |
|---|-------------|-------------|------------|
| C | -3.03265400 | 3.06283200  | 0.04010500 |
| C | -3.14053500 | 1.66824900  | 0.04061600 |
| C | -1.96536100 | 0.92721900  | 0.03528000 |
| C | -0.72639200 | 1.57316800  | 0.03466700 |
| C | -0.61159300 | 2.95297800  | 0.03347100 |
| C | -1.79251600 | 3.69834100  | 0.03515900 |
| C | -1.64377000 | -0.54464100 | 0.04716300 |
| H | -3.93671800 | 3.66259500  | 0.04378800 |
| H | -4.11556600 | 1.19495100  | 0.04510300 |
| H | 0.35092100  | 3.45776300  | 0.03380300 |
| H | -1.74399400 | 4.78205200  | 0.03465100 |

|   |             |             |             |
|---|-------------|-------------|-------------|
| C | 0.26917100  | 0.47439000  | 0.04427200  |
| C | -3.79762000 | -1.36409100 | 0.00062900  |
| C | -4.54669300 | -1.35291800 | 1.18000600  |
| C | -4.43849600 | -1.22352300 | -1.23342400 |
| C | -5.92255600 | -1.15519900 | 1.12146900  |
| H | -4.03810400 | -1.48528600 | 2.12922300  |
| C | -5.81518500 | -1.03111800 | -1.28000800 |
| H | -3.84459200 | -1.25492400 | -2.14111000 |
| C | -6.56234300 | -0.98719400 | -0.10479000 |
| H | -6.49777900 | -1.13354200 | 2.04176200  |
| H | -6.30498600 | -0.91213600 | -2.24138800 |
| H | -7.63560800 | -0.83515900 | -0.14462400 |
| N | -2.40238600 | -1.56050900 | 0.04960800  |
| N | -0.23305500 | -0.70946700 | 0.05870200  |
| N | 1.61623300  | 0.74145200  | 0.03489900  |
| H | 1.89788300  | 1.71025200  | 0.02023400  |
| C | 2.61967300  | -0.18878200 | 0.02434000  |
| C | 4.05392000  | 0.18892800  | -0.00852700 |
| N | 2.52359300  | -1.47443700 | 0.03761800  |
| C | 4.67210600  | 1.43522400  | -0.03349300 |
| C | 4.80109600  | -1.00174700 | -0.01275500 |
| C | 3.83655600  | -2.12327100 | 0.01812100  |
| C | 6.06286000  | 1.46816500  | -0.06296600 |
| H | 4.10834100  | 2.36470400  | -0.03095600 |
| C | 6.18857400  | -0.96156800 | -0.04240400 |
| N | 3.69112000  | -3.36612800 | 0.03568400  |
| C | 6.80978900  | 0.28392600  | -0.06729600 |
| H | 6.57595900  | 2.42368500  | -0.08355200 |
| H | 6.76004000  | -1.88351400 | -0.04587300 |
| H | 7.89313000  | 0.34307200  | -0.09108900 |
| H | 2.25433800  | -2.64710600 | 0.05663300  |

E(M06-2X-D3/6-31G(d,p)) = -1120.57981068 A.U.

Zero-point correction= 0.321343 (Hartree/Particle)  
 Thermal correction to Energy= 0.382734  
 Thermal correction to Enthalpy= 0.384423  
 Thermal correction to Gibbs Free Energy= 0.198825

E(M06-2X-D3/6-311+G(d,p)) = -1120.84305644 A.U.

### TS2-9H

|   |             |             |            |
|---|-------------|-------------|------------|
| C | -3.22762700 | -3.66695400 | 1.07988500 |
|---|-------------|-------------|------------|

|   |             |             |             |
|---|-------------|-------------|-------------|
| C | -3.28957300 | -2.40561500 | 0.47861200  |
| C | -2.09106400 | -1.77620200 | 0.16968000  |
| C | -0.87231100 | -2.40072400 | 0.44755500  |
| C | -0.80355500 | -3.64768400 | 1.04476600  |
| C | -2.00823300 | -4.27936600 | 1.36214000  |
| C | -1.72422200 | -0.47149400 | -0.48478900 |
| H | -4.15035800 | -4.17867700 | 1.33241600  |
| H | -4.24810900 | -1.94574900 | 0.26797200  |
| H | 0.14219400  | -4.13579300 | 1.26433900  |
| H | -1.99401000 | -5.25771700 | 1.83079900  |
| C | 0.16276400  | -1.45080700 | -0.03543400 |
| C | -3.85251200 | 0.37811000  | -0.78975300 |
| C | -4.65555600 | -0.06512700 | -1.84294700 |
| C | -4.44067600 | 0.79172500  | 0.40940700  |
| C | -6.03514400 | -0.13491600 | -1.67689100 |
| H | -4.18560200 | -0.36500600 | -2.77388800 |
| C | -5.82144200 | 0.72428500  | 0.56205700  |
| H | -3.80119700 | 1.14950600  | 1.21079000  |
| C | -6.62368500 | 0.25324700  | -0.47517600 |
| H | -6.65360900 | -0.49374400 | -2.49359100 |
| H | -6.27139300 | 1.03890600  | 1.49856700  |
| H | -7.70003200 | 0.19938700  | -0.35172300 |
| N | -2.45400300 | 0.46055200  | -0.94705100 |
| N | -0.31695600 | -0.37318300 | -0.56560100 |
| N | 1.49174500  | -1.73405400 | 0.09224800  |
| H | 1.74134000  | -2.62088700 | 0.50376500  |
| C | 2.53046500  | -0.88300700 | -0.24235900 |
| C | 3.94857400  | -1.27088200 | -0.09769000 |
| N | 2.39008500  | 0.30593100  | -0.68763200 |
| C | 4.56708700  | -2.44298400 | 0.32713800  |
| C | 4.68592100  | -0.15519700 | -0.50104600 |
| C | 3.75746300  | 0.94413800  | -0.90593100 |
| H | 1.47504500  | 1.19377400  | -0.98772800 |
| C | 5.95855900  | -2.47065900 | 0.34193500  |
| H | 4.00346600  | -3.32064600 | 0.63546500  |
| C | 6.07307600  | -0.18498000 | -0.48504300 |
| N | 3.91601400  | 2.10291000  | -1.31319600 |
| N | 1.17278100  | 2.36606500  | -1.29257400 |
| C | 6.70103700  | -1.35237500 | -0.05921400 |
| H | 6.47515000  | -3.36831200 | 0.66547600  |
| H | 6.63055200  | 0.69127400  | -0.80058000 |
| H | 2.19839000  | 2.60363200  | -1.50544000 |
| H | 0.55596100  | 2.42013200  | -2.09746500 |
| C | 0.66518400  | 3.05544200  | -0.14499800 |

|   |             |             |             |
|---|-------------|-------------|-------------|
| H | 7.78521500  | -1.40378700 | -0.03660900 |
| C | -0.70806300 | 3.13362400  | 0.07706700  |
| C | 1.56756100  | 3.58318500  | 0.77739700  |
| C | -1.17837500 | 3.76470000  | 1.22392200  |
| H | -1.39441900 | 2.67822900  | -0.63165200 |
| C | 1.08283300  | 4.20579500  | 1.92378400  |
| H | 2.63320700  | 3.50082800  | 0.58138100  |
| C | -0.28761300 | 4.30274600  | 2.15040900  |
| H | -2.24884000 | 3.83416200  | 1.39284900  |
| H | 1.78384100  | 4.62111700  | 2.64085600  |
| H | -0.65969300 | 4.79366300  | 3.04374800  |

E(M06-2X-D3/6-31G(d,p)) = -1408.13712108 A.U.

|                                          |                             |
|------------------------------------------|-----------------------------|
| Zero-point correction=                   | 0.442202 (Hartree/Particle) |
| Thermal correction to Energy=            | 0.523265                    |
| Thermal correction to Enthalpy=          | 0.524954                    |
| Thermal correction to Gibbs Free Energy= | 0.293948                    |

E(M06-2X-D3/6-311+G(d,p)) = -1408.46828441 A.U.

## INT2-9

|   |             |             |             |
|---|-------------|-------------|-------------|
| C | -2.98650200 | 3.05408200  | -0.04904600 |
| C | -3.13420000 | 1.66326800  | -0.05211100 |
| C | -1.98123700 | 0.88827600  | -0.04723200 |
| C | -0.72355600 | 1.49518900  | -0.04638100 |
| C | -0.56990500 | 2.87131200  | -0.04234500 |
| C | -1.72815800 | 3.65207500  | -0.04229300 |
| C | -1.70046200 | -0.59191100 | -0.06543800 |
| H | -3.87281300 | 3.67985800  | -0.05214600 |
| H | -4.12268400 | 1.21903600  | -0.05805800 |
| H | 0.40647100  | 3.34923600  | -0.04256100 |
| H | -1.64693100 | 4.73392900  | -0.03958500 |
| C | 0.24368700  | 0.36534300  | -0.06172700 |
| C | -3.87885600 | -1.34971000 | -0.00348400 |
| C | -4.49824000 | -1.17394700 | 1.23763200  |
| C | -4.64750400 | -1.34017900 | -1.17069000 |
| C | -5.86935400 | -0.95097000 | 1.30283600  |
| H | -3.89048500 | -1.20305700 | 2.13622900  |
| C | -6.01738600 | -1.11019000 | -1.09410600 |
| H | -4.15678800 | -1.49833200 | -2.12537000 |
| C | -6.63425900 | -0.90908800 | 0.13893500  |
| H | -6.34129100 | -0.80628200 | 2.26970600  |

|   |             |             |             |
|---|-------------|-------------|-------------|
| H | -6.60633500 | -1.08958900 | -2.00578800 |
| H | -7.70321300 | -0.73273400 | 0.19289700  |
| N | -2.49162200 | -1.58410600 | -0.06966100 |
| N | -0.29753400 | -0.80132300 | -0.08216500 |
| N | 1.59188700  | 0.62701200  | -0.05024000 |
| H | 1.85147700  | 1.60171000  | -0.03150600 |
| C | 2.63456200  | -0.26707700 | -0.03479000 |
| C | 4.03620300  | 0.23720900  | 0.00699300  |
| N | 2.52754500  | -1.55068200 | -0.05032500 |
| C | 4.61207200  | 1.49804600  | 0.03609000  |
| C | 4.81465200  | -0.91746900 | 0.01747500  |
| C | 3.85785300  | -2.05857900 | -0.01901100 |
| C | 6.00667600  | 1.56727900  | 0.07662100  |
| H | 4.02371900  | 2.41216700  | 0.02911200  |
| C | 6.19557700  | -0.85804400 | 0.05749900  |
| N | 4.19339000  | -3.27930600 | -0.02002400 |
| C | 6.78547200  | 0.40796600  | 0.08710000  |
| H | 6.49305300  | 2.53687300  | 0.10130800  |
| H | 6.78691500  | -1.76746600 | 0.06560600  |
| H | 7.86648500  | 0.49676900  | 0.11958100  |
| H | 3.34394900  | -3.85056400 | -0.04768900 |

E(M06-2X-D3/6-31G(d,p)) = -1120.68620009 A.U.

|                                          |                             |
|------------------------------------------|-----------------------------|
| Zero-point correction=                   | 0.328198 (Hartree/Particle) |
| Thermal correction to Energy=            | 0.389534                    |
| Thermal correction to Enthalpy=          | 0.391222                    |
| Thermal correction to Gibbs Free Energy= | 0.207084                    |

E(M06-2X-D3/6-311+G(d,p)) = -1120.94932447 A.U.

## INT2-10

|   |             |             |             |
|---|-------------|-------------|-------------|
| C | -3.28378400 | 2.99768200  | 0.00018900  |
| C | -3.18025700 | 1.60305600  | -0.00002600 |
| C | -1.90678100 | 1.04819700  | -0.00002400 |
| C | -0.77941300 | 1.87303200  | 0.00016600  |
| C | -0.87332500 | 3.25425000  | 0.00038300  |
| C | -2.15319900 | 3.81273000  | 0.00039600  |
| C | -1.36810700 | -0.35727900 | -0.00024800 |
| H | -4.26819100 | 3.45412700  | 0.00020300  |
| H | -4.07260000 | 0.98864600  | -0.00018500 |
| H | 0.00253000  | 3.89714400  | 0.00053900  |
| H | -2.26858900 | 4.89135700  | 0.00056300  |

|   |             |             |             |
|---|-------------|-------------|-------------|
| C | 0.37905400  | 0.94172600  | 0.00002200  |
| C | -3.37240100 | -1.50012000 | -0.00027900 |
| C | -4.07206300 | -1.53184200 | 1.20900400  |
| C | -4.07236500 | -1.53197500 | -1.20938900 |
| C | -5.46297600 | -1.55257900 | 1.20348200  |
| H | -3.51379100 | -1.52526000 | 2.13948300  |
| C | -5.46327500 | -1.55269600 | -1.20350800 |
| H | -3.51432200 | -1.52549600 | -2.14000400 |
| C | -6.16493200 | -1.55562900 | 0.00007600  |
| H | -6.00066700 | -1.56465800 | 2.14642600  |
| H | -6.00120800 | -1.56486300 | -2.14631200 |
| H | -7.24952400 | -1.57127100 | 0.00021100  |
| N | -1.96269100 | -1.47920900 | -0.00043500 |
| N | 0.04499400  | -0.30442700 | -0.00025300 |
| N | 1.64386600  | 1.44044800  | 0.00023900  |
| H | 1.73183700  | 2.44950700  | 0.00005000  |
| C | 2.89774800  | 0.85444800  | -0.00003300 |
| C | 3.28977100  | -0.58894800 | 0.00020100  |
| N | 3.89556000  | 1.67635400  | -0.00038000 |
| C | 2.62778800  | -1.81138600 | 0.00044000  |
| C | 4.68951900  | -0.53890900 | 0.00001200  |
| C | 5.07836600  | 0.90241500  | -0.00039700 |
| C | 3.41020700  | -2.97066500 | 0.00055000  |
| H | 1.54717200  | -1.86042700 | 0.00048600  |
| C | 5.46122400  | -1.68523300 | 0.00010200  |
| N | 6.22489300  | 1.44580500  | -0.00074100 |
| C | 4.80202100  | -2.91608800 | 0.00039200  |
| H | 2.91451300  | -3.93594600 | 0.00075300  |
| H | 6.54658700  | -1.63411000 | -0.00007300 |
| H | 5.37738800  | -3.83614200 | 0.00048100  |
| H | 6.94560700  | 0.71948500  | -0.00068700 |

E(M06-2X-D3/6-31G(d,p)) = -1120.68961985 A.U.

Zero-point correction= 0.328458 (Hartree/Particle)  
 Thermal correction to Energy= 0.389516  
 Thermal correction to Enthalpy= 0.391205  
 Thermal correction to Gibbs Free Energy= 0.207826

E(M06-2X-D3/6-311+G(d,p)) = -1120.95202064 A.U.

## TS2-11

|   |             |            |            |
|---|-------------|------------|------------|
| C | -3.29114800 | 2.99968200 | 0.00003300 |
|---|-------------|------------|------------|

|   |             |             |             |
|---|-------------|-------------|-------------|
| C | -3.19156300 | 1.60408600  | -0.00001100 |
| C | -1.91871600 | 1.04757600  | -0.00002700 |
| C | -0.79193100 | 1.87334400  | -0.00000100 |
| C | -0.87967000 | 3.25367900  | 0.00003900  |
| C | -2.15901200 | 3.81378000  | 0.00005700  |
| C | -1.37513300 | -0.35765200 | -0.00010100 |
| H | -4.27502900 | 3.45772400  | 0.00004400  |
| H | -4.08607300 | 0.99254100  | -0.00002100 |
| H | 0.01053700  | 3.87423300  | 0.00006600  |
| H | -2.27538800 | 4.89257500  | 0.00009300  |
| C | 0.36818600  | 0.95367000  | -0.00006200 |
| C | -3.37907400 | -1.50304500 | -0.00004500 |
| C | -4.08017300 | -1.53704000 | 1.20873600  |
| C | -4.08032500 | -1.53648900 | -1.20875400 |
| C | -5.47092700 | -1.56244900 | 1.20337500  |
| H | -3.52200100 | -1.52765600 | 2.13927700  |
| C | -5.47108100 | -1.56192400 | -1.20322300 |
| H | -3.52227900 | -1.52669000 | -2.13936800 |
| C | -6.17313300 | -1.56794400 | 0.00011900  |
| H | -6.00858400 | -1.57582600 | 2.14641100  |
| H | -6.00886500 | -1.57488200 | -2.14619200 |
| H | -7.25771500 | -1.58708800 | 0.00018300  |
| N | -1.97032400 | -1.48143500 | -0.00009700 |
| N | 0.03614500  | -0.30243200 | -0.00012800 |
| N | 1.63969400  | 1.42055500  | -0.00004900 |
| C | 2.77069100  | 0.70673500  | 0.00002000  |
| H | 2.62836200  | 2.35548300  | 0.00007000  |
| C | 3.29526100  | -0.66376900 | -0.00002600 |
| N | 3.73507200  | 1.61259000  | 0.00012700  |
| C | 2.70728100  | -1.92019100 | -0.00011600 |
| C | 4.68964100  | -0.48987600 | 0.00003900  |
| C | 4.99201900  | 0.98606000  | 0.00011300  |
| C | 3.56932800  | -3.01995100 | -0.00013700 |
| H | 1.62697600  | -2.01614400 | -0.00017600 |
| C | 5.53535100  | -1.58321400 | 0.00001100  |
| N | 6.09337300  | 1.61238900  | 0.00014100  |
| C | 4.95441700  | -2.85564900 | -0.00007500 |
| H | 3.15263800  | -4.02148600 | -0.00020000 |
| H | 6.61521100  | -1.46611800 | 0.00005200  |
| H | 6.86885200  | 0.94754000  | 0.00012100  |
| H | 5.59390400  | -3.73240800 | -0.00009000 |

E(M06-2X-D3/6-31G(d,p)) = -1120.62594448 A.U.



|                                          |                             |
|------------------------------------------|-----------------------------|
| Zero-point correction=                   | 0.322851 (Hartree/Particle) |
| Thermal correction to Energy=            | 0.383395                    |
| Thermal correction to Enthalpy=          | 0.385084                    |
| Thermal correction to Gibbs Free Energy= | 0.202839                    |

E(M06-2X-D3/6-311+G(d,p)) = -1120.88680177 A.U.

### TS2-11H

|   |             |             |             |
|---|-------------|-------------|-------------|
| C | 2.72787000  | -3.22332400 | 0.02442900  |
| C | 3.21220300  | -1.91174300 | -0.02312600 |
| C | 2.28366400  | -0.88453800 | -0.13812500 |
| C | 0.91909300  | -1.16773100 | -0.20495900 |
| C | 0.43094300  | -2.46154900 | -0.14117400 |
| C | 1.36185600  | -3.49733700 | -0.02923300 |
| C | 2.36765200  | 0.61877400  | -0.18719400 |
| H | 3.43264400  | -4.04387800 | 0.11305700  |
| H | 4.27761600  | -1.71943800 | 0.03141000  |
| H | -0.63594800 | -2.66933600 | -0.15532500 |
| H | 1.01855800  | -4.52559600 | 0.02407900  |
| C | 0.23229200  | 0.15139000  | -0.31496200 |
| C | 4.66211800  | 0.83301400  | -0.02927500 |
| C | 5.24952100  | 0.62900300  | 1.22337600  |
| C | 5.38194700  | 0.52125400  | -1.18714100 |
| C | 6.52470900  | 0.08071300  | 1.31237500  |
| H | 4.68739500  | 0.89052100  | 2.11401200  |
| C | 6.65746500  | -0.02446300 | -1.08779900 |
| H | 4.92134100  | 0.69921800  | -2.15353200 |
| C | 7.23287800  | -0.25454900 | 0.16016500  |
| H | 6.96708800  | -0.08617300 | 2.28979200  |
| H | 7.20357700  | -0.27455600 | -1.99220400 |
| H | 8.22733300  | -0.68166100 | 0.23468300  |
| N | 3.37567000  | 1.39408600  | -0.12676100 |
| N | 1.06935200  | 1.14850400  | -0.30585200 |
| N | -1.11172200 | 0.16504100  | -0.45878200 |
| C | -1.93136500 | 1.22890400  | -0.40677200 |
| H | -1.94423800 | -0.99569900 | -1.07301900 |
| C | -1.73657200 | 2.65011900  | 0.04778900  |
| N | -3.20295400 | 1.02731700  | -0.74850500 |
| N | -2.93149600 | -1.43892100 | -1.37397600 |
| C | -0.65846900 | 3.39318400  | 0.51884200  |
| C | -3.00409900 | 3.23612400  | -0.05134000 |
| C | -3.93935900 | 2.20171300  | -0.57693100 |
| H | -3.41554900 | -0.44149400 | -1.23944200 |

|   |             |             |             |
|---|-------------|-------------|-------------|
| H | -2.95290100 | -1.76612000 | -2.33637300 |
| C | -3.36513300 | -2.42652500 | -0.41994800 |
| C | -0.89263500 | 4.71999600  | 0.88916500  |
| H | 0.33289800  | 2.96284500  | 0.56268000  |
| C | -3.23560900 | 4.55109400  | 0.30845000  |
| N | -5.18002000 | 2.26704800  | -0.85150500 |
| C | -3.62843900 | -3.73447100 | -0.81042900 |
| C | -3.47435600 | -2.03854700 | 0.91413300  |
| C | -2.15755200 | 5.29608200  | 0.78814100  |
| H | -0.06303700 | 5.31587500  | 1.25565300  |
| H | -4.22479400 | 4.99270300  | 0.22291000  |
| H | -5.52273900 | 3.20949700  | -0.65462800 |
| C | -4.01561200 | -4.66716700 | 0.14790000  |
| H | -3.53430100 | -4.02207900 | -1.85401900 |
| C | -3.86080800 | -2.97939900 | 1.86160200  |
| H | -3.26151700 | -1.00994700 | 1.18948600  |
| H | -2.30365300 | 6.33125100  | 1.07988600  |
| C | -4.13250800 | -4.29254900 | 1.48268200  |
| H | -4.22644100 | -5.68786900 | -0.15324000 |
| H | -3.95000000 | -2.68296400 | 2.90125100  |
| H | -4.43530900 | -5.02145100 | 2.22672900  |

E(M06-2X-D3/6-31G(d,p)) = -1408.17518241 A.U.

|                                          |                             |
|------------------------------------------|-----------------------------|
| Zero-point correction=                   | 0.444130 (Hartree/Particle) |
| Thermal correction to Energy=            | 0.524094                    |
| Thermal correction to Enthalpy=          | 0.525783                    |
| Thermal correction to Gibbs Free Energy= | 0.298328                    |

E(M06-2X-D3/6-311+G(d,p)) = -1408.50556969 A.U.

## INT2-11

|   |             |             |             |
|---|-------------|-------------|-------------|
| C | -3.21521100 | 3.00072100  | -0.41598700 |
| C | -3.14493400 | 1.62130300  | -0.19248300 |
| C | -1.88529200 | 1.06248000  | -0.01539200 |
| C | -0.74421400 | 1.86454300  | -0.05897200 |
| C | -0.80319000 | 3.22850100  | -0.27928300 |
| C | -2.06806200 | 3.79322900  | -0.46034200 |
| C | -1.36872700 | -0.32302400 | 0.25120300  |
| H | -4.18677300 | 3.46344600  | -0.55667000 |
| H | -4.04943100 | 1.02496500  | -0.16019100 |
| H | 0.10300800  | 3.82434200  | -0.30282500 |
| H | -2.16280300 | 4.86019000  | -0.63506500 |

|   |             |             |             |
|---|-------------|-------------|-------------|
| C | 0.40676100  | 0.95652100  | 0.18046800  |
| C | -3.37466100 | -1.45925900 | 0.21845200  |
| C | -4.19524500 | -1.37693100 | 1.34671000  |
| C | -3.94899200 | -1.60873900 | -1.04732100 |
| C | -5.57817900 | -1.40215600 | 1.20094500  |
| H | -3.73533500 | -1.27684600 | 2.32439800  |
| C | -5.33307600 | -1.63595100 | -1.18169700 |
| H | -3.29934100 | -1.68477700 | -1.91333600 |
| C | -6.15420800 | -1.52550600 | -0.06174000 |
| H | -6.20915600 | -1.32442600 | 2.08095200  |
| H | -5.77175700 | -1.74067300 | -2.16920300 |
| H | -7.23327400 | -1.54508300 | -0.17111200 |
| N | -1.97283400 | -1.43613900 | 0.36397100  |
| N | 0.04160400  | -0.27356100 | 0.37185100  |
| N | 1.66119200  | 1.49633300  | 0.22918600  |
| C | 2.77125200  | 0.83752200  | 0.19125300  |
| C | 3.20989500  | -0.58159500 | -0.01998200 |
| C | 2.51733600  | -1.77715700 | -0.19378900 |
| C | 4.61290900  | -0.57823000 | -0.03497000 |
| C | 5.09789500  | 0.80564600  | 0.19214500  |
| C | 3.26190000  | -2.94075400 | -0.39741800 |
| H | 1.43718900  | -1.79782300 | -0.14141500 |
| C | 5.35065800  | -1.73196900 | -0.22899500 |
| N | 6.25294500  | 1.32212700  | 0.27454600  |
| C | 4.65546800  | -2.92580100 | -0.41696000 |
| H | 2.73773000  | -3.88071300 | -0.53440900 |
| H | 6.43653600  | -1.71056600 | -0.23460700 |
| H | 5.20201000  | -3.85011500 | -0.57292200 |
| H | 6.96751500  | 0.60509700  | 0.15035700  |
| N | 3.93345500  | 1.55646100  | 0.32064700  |
| H | 3.92885100  | 2.55606200  | 0.45956900  |

E(M06-2X-D3/6-31G(d,p)) = -1120.70093843 A.U.

Zero-point correction= 0.328595 (Hartree/Particle)  
 Thermal correction to Energy= 0.389674  
 Thermal correction to Enthalpy= 0.391362  
 Thermal correction to Gibbs Free Energy= 0.207463

E(M06-2X-D3/6-311+G(d,p)) = -1120.96290369 A.U.

### TS3-5

|   |            |             |            |
|---|------------|-------------|------------|
| C | 4.78425600 | -3.16953000 | 1.21306500 |
|---|------------|-------------|------------|

|   |             |             |             |
|---|-------------|-------------|-------------|
| C | 5.05116800  | -1.94007500 | 0.60046000  |
| C | 3.96608900  | -1.19979600 | 0.14759200  |
| C | 2.66770300  | -1.68809300 | 0.30075100  |
| C | 2.39221700  | -2.90174700 | 0.90360300  |
| C | 3.48138400  | -3.64432400 | 1.36560500  |
| C | 3.80030600  | 0.11496600  | -0.56043900 |
| H | 5.61369000  | -3.76858400 | 1.57493600  |
| H | 6.07188800  | -1.59243500 | 0.48853700  |
| H | 1.37102300  | -3.25538300 | 0.99951400  |
| H | 3.31558400  | -4.60433000 | 1.84354600  |
| C | 1.77818300  | -0.66882800 | -0.30482800 |
| C | 6.00394800  | 0.78902400  | -0.58044100 |
| C | 6.47265200  | 1.12503400  | 0.69275000  |
| C | 6.89097100  | 0.29354100  | -1.53933600 |
| C | 7.81205200  | 0.93046700  | 1.01227300  |
| H | 5.77421400  | 1.52338000  | 1.42178800  |
| C | 8.22712600  | 0.09505000  | -1.20671400 |
| H | 6.51609800  | 0.05394600  | -2.52890300 |
| C | 8.69329300  | 0.40720200  | 0.06849800  |
| H | 8.16669300  | 1.18525500  | 2.00608900  |
| H | 8.90834700  | -0.30622700 | -1.95049500 |
| H | 9.73672800  | 0.25216000  | 0.32129700  |
| N | 4.64829100  | 0.99372400  | -0.91120300 |
| N | 2.41884400  | 0.33160200  | -0.81787100 |
| N | 0.42661000  | -0.90571600 | -0.34608400 |
| C | -0.47875900 | -0.00426800 | -0.31646500 |
| C | -0.51668200 | 1.48325300  | -0.11176400 |
| N | -1.80814100 | -0.40433900 | -0.40684800 |
| C | 0.46622500  | 2.45694500  | 0.02255900  |
| C | -1.86797800 | 1.84649800  | -0.02759300 |
| C | -2.66492100 | 0.62236200  | -0.23427500 |
| H | -2.24951700 | -1.35861700 | -0.48846600 |
| C | 0.05430100  | 3.76919900  | 0.27374700  |
| H | 1.51248900  | 2.21147300  | -0.09976200 |
| C | -2.28406000 | 3.14126000  | 0.22422100  |
| N | -3.95260300 | 0.49297000  | -0.25011000 |
| N | -3.86112600 | -1.99716900 | -0.45509200 |
| C | -1.29259300 | 4.11095900  | 0.38085600  |
| H | 0.80845000  | 4.54144500  | 0.38284700  |
| H | -3.33746600 | 3.39277600  | 0.31453200  |
| H | -4.46846800 | 1.35273100  | -0.09450200 |
| C | -4.60964500 | -1.05552200 | -0.32568100 |
| H | -1.57307200 | 5.13920600  | 0.58245100  |
| C | -6.10077600 | -0.98052800 | -0.26282400 |

|   |             |             |             |
|---|-------------|-------------|-------------|
| C | -6.90353400 | 0.00706100  | 0.34062900  |
| C | -6.75249800 | -2.08357800 | -0.82762200 |
| C | -8.30248700 | -0.11336500 | 0.35774000  |
| C | -6.37050800 | 1.18270800  | 0.97566300  |
| C | -8.13442900 | -2.19819500 | -0.81479100 |
| H | -6.12535900 | -2.85027200 | -1.26851000 |
| C | -8.91844800 | -1.20991200 | -0.22071300 |
| H | -8.88730500 | 0.66432300  | 0.83702900  |
| N | -5.96019900 | 2.15638700  | 1.45208100  |
| H | -8.60376000 | -3.06419100 | -1.26999700 |
| H | -9.99931700 | -1.29549100 | -0.20520500 |

E(M06-2X-D3/6-31G(d,p)) = -1537.24182176 A.U.

|                                          |                             |
|------------------------------------------|-----------------------------|
| Zero-point correction=                   | 0.427081 (Hartree/Particle) |
| Thermal correction to Energy=            | 0.511711                    |
| Thermal correction to Enthalpy=          | 0.513399                    |
| Thermal correction to Gibbs Free Energy= | 0.273679                    |

E(M06-2X-D3/6-311+G(d,p)) = -1537.60191900 A.U.

### INT3-5

|   |             |             |             |
|---|-------------|-------------|-------------|
| C | -4.98882700 | 2.71866100  | 1.73104100  |
| C | -5.17556900 | 1.63618400  | 0.86425400  |
| C | -4.04730500 | 1.09319900  | 0.26218700  |
| C | -2.78432500 | 1.62679800  | 0.52290800  |
| C | -2.58845500 | 2.69776800  | 1.37559500  |
| C | -3.72123200 | 3.24212700  | 1.98537200  |
| C | -3.79793300 | -0.03121300 | -0.70465400 |
| H | -5.85330000 | 3.16219200  | 2.21451200  |
| H | -6.17049900 | 1.24787700  | 0.67809800  |
| H | -1.59404800 | 3.09554700  | 1.54972300  |
| H | -3.61711500 | 4.08354600  | 2.66276800  |
| C | -1.83357000 | 0.81670200  | -0.27848100 |
| C | -5.96193700 | -0.79947200 | -0.91034400 |
| C | -6.46069800 | -1.47664900 | 0.20566400  |
| C | -6.83479000 | -0.08509100 | -1.73539000 |
| C | -7.81580600 | -1.40512400 | 0.51128100  |
| H | -5.77492200 | -2.04134700 | 0.82912100  |
| C | -8.18736500 | -0.01684800 | -1.41872500 |
| H | -6.43537500 | 0.42087300  | -2.60825500 |
| C | -8.68423500 | -0.67049100 | -0.29305400 |
| H | -8.19364000 | -1.92441600 | 1.38664500  |

|   |             |             |             |
|---|-------------|-------------|-------------|
| H | -8.85599200 | 0.55329400  | -2.05619100 |
| H | -9.74003100 | -0.61566500 | -0.05009400 |
| N | -4.59179300 | -0.87069100 | -1.23304300 |
| N | -2.40716000 | -0.10145700 | -0.98816600 |
| N | -0.50594900 | 1.15742500  | -0.30748500 |
| C | 0.45731900  | 0.32420200  | -0.23439700 |
| C | 0.50109700  | -1.15599400 | 0.04349900  |
| N | 1.77431600  | 0.80894500  | -0.34795800 |
| C | -0.45384000 | -2.14413700 | 0.23834400  |
| C | 1.86004700  | -1.47067100 | 0.13250600  |
| C | 2.56841700  | -0.19973000 | -0.15036300 |
| H | 3.23104800  | 2.18539900  | -0.61087600 |
| C | -0.00487100 | -3.43256000 | 0.54795500  |
| H | -1.50942800 | -1.93963500 | 0.12174500  |
| C | 2.31640100  | -2.73927400 | 0.44471900  |
| N | 3.92271500  | -0.14824200 | -0.19320100 |
| N | 4.25369400  | 2.17460800  | -0.59482600 |
| C | 1.35187600  | -3.72830400 | 0.65600200  |
| H | -0.73527400 | -4.21991700 | 0.70185900  |
| H | 3.37411500  | -2.96848200 | 0.54723500  |
| H | 4.38810500  | -1.03553400 | -0.07251500 |
| C | 4.70374400  | 1.00899100  | -0.38810900 |
| H | 1.66463900  | -4.73693900 | 0.90417500  |
| C | 6.19791600  | 0.81694200  | -0.36491500 |
| C | 6.90181700  | -0.23980000 | 0.24625000  |
| C | 6.94915800  | 1.81458500  | -0.99240800 |
| C | 8.30324700  | -0.28248100 | 0.21916700  |
| C | 6.25561300  | -1.33062500 | 0.92858400  |
| C | 8.33607000  | 1.77015500  | -1.02055700 |
| H | 6.40473000  | 2.63166100  | -1.45057800 |
| C | 9.02062600  | 0.71912200  | -0.41413400 |
| H | 8.81036100  | -1.10870300 | 0.70503900  |
| N | 5.74303800  | -2.23375000 | 1.44230700  |
| H | 8.88501000  | 2.56082100  | -1.52101800 |
| H | 10.10405900 | 0.67972700  | -0.43359100 |

E(M06-2X-D3/6-31G(d,p)) = -1537.28754607 A.U.

Zero-point correction= 0.431200 (Hartree/Particle)  
 Thermal correction to Energy= 0.516075  
 Thermal correction to Enthalpy= 0.517763  
 Thermal correction to Gibbs Free Energy= 0.277605

E(M06-2X-D3/6-311+G(d,p)) = -1537.64739807 A.U.

**INT4-1**

|   |             |             |             |
|---|-------------|-------------|-------------|
| N | -6.22110800 | 1.43342900  | 0.26856300  |
| N | -4.26020000 | 0.34644000  | -0.55320500 |
| N | 4.17540200  | 0.72577000  | 0.15548500  |
| N | -2.05239900 | -0.16263300 | -1.02862300 |
| N | 2.17813800  | -0.36062300 | 0.84475700  |
| N | -0.04902800 | -0.23198500 | 0.23171100  |
| C | -7.11315700 | 0.50676100  | 0.16269800  |
| C | -9.32474300 | -0.20083100 | 0.13342100  |
| C | -4.88039500 | 1.24859300  | 0.15421200  |
| C | -2.88251600 | 0.58808700  | -0.41379000 |
| C | 3.53467200  | -0.27447100 | 0.67020500  |
| C | -0.69796600 | -0.09484300 | -0.88506700 |
| C | 1.32510400  | -0.20590700 | -0.09087900 |
| C | -7.11236900 | -0.99017600 | 0.15151500  |
| C | -8.45189100 | -1.40119600 | 0.15646400  |
| C | -3.95416000 | 2.21136700  | 0.80034100  |
| C | 5.72357000  | -0.89888700 | 0.96176600  |
| C | -2.66833400 | 1.79308200  | 0.45758200  |
| C | 4.42167400  | -1.32808800 | 1.22303100  |
| C | 1.48825400  | -0.03624500 | -1.57858000 |
| C | 0.18365600  | 0.00320700  | -2.07388500 |
| C | -8.80899700 | -2.73797800 | 0.17904300  |
| C | -6.09100700 | -1.93538500 | 0.16337500  |
| C | -4.18947600 | 3.32092200  | 1.58925700  |
| C | 6.80787000  | -1.66745600 | 1.36712800  |
| C | -1.55822200 | 2.49271600  | 0.90633600  |
| C | 4.14277600  | -2.51304500 | 1.87889300  |
| C | 2.56550200  | 0.05752100  | -2.44839500 |
| C | -0.10408900 | 0.12464800  | -3.42009600 |
| C | -7.78579300 | -3.68426500 | 0.20354300  |
| C | -6.44984300 | -3.28364400 | 0.19635900  |
| C | -3.07314900 | 4.03086600  | 2.04031900  |
| C | 6.53790500  | -2.86983500 | 2.03022100  |
| C | -1.78396500 | 3.62220500  | 1.70123600  |
| C | 5.23191900  | -3.28918100 | 2.28284300  |
| C | 2.28797900  | 0.17502800  | -3.81523300 |
| C | 0.98043800  | 0.20815200  | -4.29726500 |
| H | -9.85139000 | -3.04287300 | 0.17935200  |
| H | -5.05396100 | -1.63405600 | 0.11028900  |
| H | -5.20213700 | 3.62112900  | 1.83681000  |
| H | 7.83126200  | -1.35924100 | 1.18589800  |

|   |              |             |             |
|---|--------------|-------------|-------------|
| H | -0.54926000  | 2.17641900  | 0.67533400  |
| H | 3.11836600   | -2.81245000 | 2.07486900  |
| H | 3.58655400   | 0.07186500  | -2.09139900 |
| H | -1.13066200  | 0.14729700  | -3.77073600 |
| H | -8.02993900  | -4.74125200 | 0.22202500  |
| H | -5.66751700  | -4.03522100 | 0.20526000  |
| H | -3.20835800  | 4.90975000  | 2.66243100  |
| H | 7.36749200   | -3.48874300 | 2.35671000  |
| H | -0.93248500  | 4.18738300  | 2.06566300  |
| H | 5.06260500   | -4.22722200 | 2.80153800  |
| H | 3.11410400   | 0.25249700  | -4.51450200 |
| H | 0.80534700   | 0.30519200  | -5.36379600 |
| C | 5.55960900   | 0.42349000  | 0.26288500  |
| C | 7.78268500   | 0.87219400  | -0.15790300 |
| C | 8.59151900   | 1.38190700  | 0.86108400  |
| C | 8.34256500   | 0.05287500  | -1.14275100 |
| C | 9.93788800   | 1.03639900  | 0.91460900  |
| H | 8.14839300   | 2.03232500  | 1.60800400  |
| C | 9.69113100   | -0.28149100 | -1.08356200 |
| H | 7.70603500   | -0.32220500 | -1.93782600 |
| C | 10.49359500  | 0.20097800  | -0.05216400 |
| H | 10.55663600  | 1.42361200  | 1.71818100  |
| H | 10.11530000  | -0.92719300 | -1.84627700 |
| H | 11.54457600  | -0.06404400 | -0.00728700 |
| N | -10.58030300 | -0.03423200 | 0.11561600  |
| H | -11.05638600 | -0.93617800 | 0.12074900  |
| N | 6.41991200   | 1.22360200  | -0.22080400 |
| N | -8.43183500  | 0.87133000  | 0.13357200  |
| H | -8.72605400  | 1.83709500  | 0.14642000  |

E(M06-2X-D3/6-31G(d,p)) = -1953.90031125 A.U.

Zero-point correction= 0.536367 (Hartree/Particle)

Thermal correction to Energy= 0.642139

Thermal correction to Enthalpy= 0.643828

Thermal correction to Gibbs Free Energy= 0.354526

E(M06-2X-D3/6-311+G(d,p)) = -1954.35394422 A.U.

#### INT4-2

|   |             |             |             |
|---|-------------|-------------|-------------|
| N | -0.02323800 | 3.09409400  | -0.18791400 |
| N | -1.90787200 | 1.62810500  | -0.14794100 |
| N | 0.22089900  | -1.51752900 | -0.03836700 |



|   |             |             |             |
|---|-------------|-------------|-------------|
| N | -4.04595200 | 0.74848300  | 0.47765500  |
| N | -1.51621200 | -3.14320500 | -0.12675700 |
| N | -2.52218200 | -1.05531500 | 0.44539500  |
| C | 0.69386500  | 2.27470200  | -0.92125700 |
| C | 1.44385700  | 0.55483600  | -2.23621700 |
| C | -1.29378800 | 2.76043300  | 0.12478700  |
| C | -3.16856100 | 1.69240600  | 0.43625700  |
| C | -0.27599400 | -2.67878500 | 0.25279800  |
| C | -3.66414100 | -0.51574500 | 0.12514000  |
| C | -2.51959800 | -2.34334600 | -0.09567000 |
| C | 2.11317500  | 2.53627500  | -1.23038000 |
| C | 2.58112400  | 1.48795700  | -2.01712700 |
| C | -2.16517200 | 3.70283100  | 0.87923900  |
| C | 1.86597400  | -2.82304200 | 1.07789300  |
| C | -3.37638300 | 3.03449300  | 1.04274400  |
| C | 0.68760400  | -3.56337000 | 0.95517800  |
| C | -3.84715700 | -2.64247000 | -0.69954400 |
| C | -4.57554100 | -1.45835200 | -0.58149400 |
| C | 3.91064800  | 1.42134000  | -2.39899500 |
| C | 2.94235000  | 3.56101100  | -0.80437300 |
| C | -1.96919000 | 4.98151100  | 1.36437200  |
| C | 2.95687200  | -3.34792400 | 1.75598800  |
| C | -4.44103200 | 3.61416000  | 1.70608800  |
| C | 0.56142600  | -4.84323000 | 1.46259600  |
| C | -4.37418400 | -3.75667100 | -1.32309800 |
| C | -5.86312400 | -1.34520300 | -1.07008100 |
| C | 4.76011900  | 2.44090500  | -1.96480700 |
| C | 4.28296500  | 3.49728400  | -1.18376400 |
| C | -3.04483900 | 5.58327900  | 2.02819100  |
| C | 2.83838800  | -4.64107400 | 2.27802600  |
| C | -4.25760700 | 4.91293800  | 2.19513700  |
| C | 1.66598500  | -5.38104900 | 2.12857600  |
| C | -5.68148600 | -3.65655700 | -1.81483200 |
| C | -6.41173700 | -2.47439400 | -1.68994200 |
| H | 4.29286200  | 0.59572100  | -2.99218500 |
| H | 2.55169400  | 4.36303300  | -0.18716800 |
| H | -1.01849200 | 5.48747500  | 1.23434000  |
| H | 3.87594900  | -2.78602900 | 1.87902500  |
| H | -5.37707200 | 3.08124500  | 1.83664500  |
| H | -0.36479600 | -5.39668100 | 1.34813200  |
| H | -3.79534600 | -4.66933400 | -1.41995100 |
| H | -6.42036100 | -0.41907000 | -0.97578300 |
| H | 5.81221900  | 2.40659500  | -2.22790400 |
| H | 4.97113300  | 4.27117600  | -0.85978800 |

|   |             |             |             |
|---|-------------|-------------|-------------|
| H | -2.93549500 | 6.58773300  | 2.42437700  |
| H | 3.67883600  | -5.07715600 | 2.80841300  |
| H | -5.07075700 | 5.40883400  | 2.71528000  |
| H | 1.60997100  | -6.38274100 | 2.54246800  |
| H | -6.13684900 | -4.51238000 | -2.30256800 |
| H | -7.42181200 | -2.42998100 | -2.08436400 |
| C | 1.55576400  | -1.50317200 | 0.42894100  |
| C | 3.61999100  | -0.36494500 | 0.50998400  |
| C | 4.51724300  | -1.20367400 | -0.16567300 |
| C | 4.11689000  | 0.68873800  | 1.28546900  |
| C | 5.88791200  | -1.00297800 | -0.04219500 |
| H | 4.12172300  | -1.99545500 | -0.79634500 |
| C | 5.48804700  | 0.87180300  | 1.41444400  |
| H | 3.40980200  | 1.35796600  | 1.76516100  |
| C | 6.38023100  | 0.03121000  | 0.75049000  |
| H | 6.57385900  | -1.65591400 | -0.57341900 |
| H | 5.86251800  | 1.68708000  | 2.02580200  |
| H | 7.44997300  | 0.18655400  | 0.84367200  |
| N | 1.32584000  | -0.51265300 | -2.90478900 |
| H | 2.22011300  | -0.74057400 | -3.34274400 |
| N | 2.24362200  | -0.44278700 | 0.27533700  |
| N | 0.35969300  | 1.11898300  | -1.52976900 |
| H | -0.47721500 | 0.59186700  | -1.27837400 |

E(M06-2X-D3/6-31G(d,p)) = -1953.92713848 A.U.

Zero-point correction= 0.537075 (Hartree/Particle)  
 Thermal correction to Energy= 0.641581  
 Thermal correction to Enthalpy= 0.643270  
 Thermal correction to Gibbs Free Energy= 0.370145

E(M06-2X-D3/6-311+G(d,p)) = -1954.38056887 A.U.

### TS4-3

|   |             |             |             |
|---|-------------|-------------|-------------|
| N | -2.65222600 | 2.81385300  | 0.28233500  |
| N | -2.81319700 | 0.44612900  | 0.23375200  |
| N | 1.37458200  | -0.57201700 | 0.33699100  |
| N | -3.78093900 | -1.73892100 | -0.05910800 |
| N | 0.80340400  | -2.81273800 | -0.18796000 |
| N | -1.39641600 | -1.87909500 | -0.30619400 |
| C | -1.36041500 | 2.82594100  | 0.19719400  |
| C | 0.82988300  | 2.31761600  | -0.13448500 |
| C | -3.33831900 | 1.64124300  | 0.19070900  |

|   |             |             |             |
|---|-------------|-------------|-------------|
| C | -3.85984400 | -0.46064800 | 0.02642800  |
| C | 1.43878100  | -1.60601500 | -0.43014500 |
| C | -2.55683600 | -2.36982300 | 0.01437800  |
| C | -0.45851000 | -2.91183200 | -0.07951800 |
| C | -0.60074300 | 4.08450100  | 0.22167600  |
| C | 0.73737800  | 3.77962700  | 0.00582900  |
| C | -4.80919100 | 1.62795700  | 0.00093700  |
| C | 3.05734200  | -0.27748900 | -1.32857100 |
| C | -5.14348300 | 0.27955300  | -0.09916900 |
| C | 2.43943100  | -1.50464300 | -1.51810000 |
| C | -1.16012800 | -4.14764900 | 0.35284900  |
| C | -2.50327800 | -3.79416400 | 0.43391000  |
| C | 1.70994100  | 4.76708400  | -0.04072600 |
| C | -1.03254900 | 5.38963000  | 0.39756300  |
| C | -5.76269500 | 2.62509000  | -0.08314300 |
| C | 4.09108900  | 0.13839900  | -2.14765900 |
| C | -6.44924200 | -0.13056000 | -0.28864800 |
| C | 2.81441200  | -2.36484600 | -2.53923400 |
| C | -0.72246500 | -5.41748900 | 0.67987400  |
| C | -3.47188000 | -4.69584100 | 0.83686000  |
| C | 1.28673400  | 6.08237800  | 0.14583600  |
| C | -0.06219300 | 6.38943100  | 0.36072200  |
| C | -7.08915800 | 2.22028300  | -0.27065400 |
| C | 4.46855400  | -0.70907000 | -3.19173500 |
| C | -7.42553400 | 0.86921600  | -0.37147400 |
| C | 3.83964400  | -1.94166800 | -3.38596000 |
| C | -1.69253400 | -6.33980000 | 1.08554700  |
| C | -3.04152300 | -5.98585100 | 1.16291300  |
| H | 2.75441000  | 4.53081900  | -0.21657300 |
| H | -2.08288700 | 5.60535100  | 0.55926300  |
| H | -5.48906400 | 3.67204200  | -0.00728900 |
| H | 4.60633200  | 1.07777400  | -1.97143700 |
| H | -6.69850200 | -1.18345000 | -0.36771100 |
| H | 2.33429100  | -3.32990900 | -2.66556100 |
| H | 0.32884100  | -5.67932700 | 0.62251400  |
| H | -4.51619800 | -4.40814900 | 0.89541600  |
| H | 2.01617700  | 6.88495600  | 0.12150700  |
| H | -0.35342400 | 7.42513300  | 0.49962900  |
| H | -7.87198000 | 2.96835100  | -0.34205900 |
| H | 5.27601500  | -0.41447900 | -3.85440200 |
| H | -8.46429900 | 0.59160400  | -0.51776300 |
| H | 4.16384600  | -2.58244600 | -4.19950200 |
| H | -1.39411700 | -7.34961100 | 1.34791100  |
| H | -3.76615300 | -6.72674700 | 1.48514600  |

|   |             |             |             |
|---|-------------|-------------|-------------|
| C | 2.45658800  | 0.33612800  | -0.06961000 |
| C | 4.56763500  | 0.23114300  | 1.16758600  |
| C | 5.56096300  | 1.04131000  | 1.76222600  |
| C | 4.90646100  | -1.11628700 | 0.91479000  |
| C | 6.81725300  | 0.54422900  | 2.06545900  |
| H | 5.30492700  | 2.07480000  | 1.97775200  |
| C | 6.17167000  | -1.60375600 | 1.22308300  |
| H | 4.16378100  | -1.79198000 | 0.50501700  |
| C | 7.14264600  | -0.78579300 | 1.79284700  |
| H | 7.55444800  | 1.20201700  | 2.51801700  |
| H | 6.39512400  | -2.64733700 | 1.01816700  |
| H | 8.12712600  | -1.17564800 | 2.02857500  |
| N | 1.95156700  | 1.73371800  | -0.39612800 |
| N | 3.33406400  | 0.80441500  | 0.94862300  |
| H | 2.86765600  | 2.09934400  | 0.12993200  |
| N | -0.44224600 | 1.80266300  | 0.00911200  |
| H | -0.68179700 | 0.80565100  | 0.04118700  |

E(M06-2X-D3/6-31G(d,p)) = -1953.84676205 A.U.

|                                          |                             |
|------------------------------------------|-----------------------------|
| Zero-point correction=                   | 0.533829 (Hartree/Particle) |
| Thermal correction to Energy=            | 0.636768                    |
| Thermal correction to Enthalpy=          | 0.638456                    |
| Thermal correction to Gibbs Free Energy= | 0.368016                    |

E(M06-2X-D3/6-311+G(d,p)) = -1954.29758429 A.U.

#### TS4-3H

|   |             |             |             |
|---|-------------|-------------|-------------|
| N | 1.32831800  | 3.52607100  | 0.01585900  |
| N | 2.71096100  | 1.60673400  | -0.20711200 |
| N | -0.16196900 | -1.40661600 | 0.12908000  |
| N | 4.72830600  | 0.28537600  | -0.19221300 |
| N | 1.49285500  | -3.02215900 | 0.69367600  |
| N | 2.84195400  | -1.06070000 | 0.44191900  |
| C | 0.26087000  | 2.85384700  | 0.29156900  |
| C | -1.27734600 | 1.24802800  | 0.75358100  |
| C | 2.52797100  | 2.89692600  | -0.15392700 |
| C | 4.09734100  | 1.40196800  | -0.24925800 |
| C | 0.30588400  | -2.33834900 | 0.88957500  |
| C | 4.04248900  | -0.90082500 | -0.03274400 |
| C | 2.59468600  | -2.44836700 | 0.41791000  |
| C | -1.00399800 | 3.52859100  | 0.61844400  |
| C | -1.93184000 | 2.55754000  | 0.96605800  |

|   |             |             |             |
|---|-------------|-------------|-------------|
| C | 3.78841800  | 3.67489400  | -0.23884300 |
| C | -1.83941700 | -2.17517500 | 1.64729700  |
| C | 4.79334200  | 2.71373300  | -0.31589900 |
| C | -0.65705800 | -2.85554800 | 1.88848300  |
| C | 3.80783400  | -3.17409200 | -0.03759900 |
| C | 4.72738600  | -2.17929000 | -0.35544900 |
| C | -3.21801800 | 2.88971100  | 1.36259800  |
| C | -1.31799500 | 4.87781800  | 0.62795000  |
| C | 4.07098200  | 5.02791000  | -0.24126200 |
| C | -2.97999300 | -2.44246200 | 2.38369900  |
| C | 6.12716400  | 3.06335000  | -0.39627800 |
| C | -0.55308900 | -3.82746400 | 2.87176400  |
| C | 4.09706000  | -4.51399600 | -0.21318400 |
| C | 5.98323700  | -2.47902000 | -0.85096600 |
| C | -3.55126100 | 4.24414200  | 1.35546500  |
| C | -2.61897700 | 5.22156900  | 0.99263900  |
| C | 5.41917800  | 5.39372700  | -0.33198600 |
| C | -2.88662000 | -3.40327800 | 3.39385900  |
| C | 6.42686100  | 4.43085800  | -0.40761100 |
| C | -1.69172100 | -4.08661900 | 3.63501000  |
| C | 5.36598500  | -4.83082400 | -0.70984500 |
| C | 6.29140200  | -3.83272000 | -1.02209000 |
| H | -3.94563700 | 2.13388100  | 1.63741400  |
| H | -0.57622200 | 5.61866800  | 0.35090000  |
| H | 3.28066700  | 5.76778900  | -0.17306600 |
| H | -3.91663100 | -1.93165500 | 2.17905600  |
| H | 6.90182800  | 2.30571900  | -0.44956300 |
| H | 0.37608700  | -4.36515500 | 3.03049400  |
| H | 3.36741300  | -5.28058100 | 0.02573800  |
| H | 6.69203600  | -1.69463000 | -1.09407100 |
| H | -4.55935400 | 4.53872100  | 1.62595500  |
| H | -2.91646100 | 6.26482400  | 0.99598800  |
| H | 5.68858000  | 6.44481800  | -0.34060000 |
| H | -3.76071300 | -3.63597100 | 3.99381500  |
| H | 7.46143100  | 4.75111600  | -0.47482900 |
| H | -1.65558700 | -4.83639600 | 4.41868700  |
| H | 5.63777600  | -5.87091100 | -0.85780900 |
| H | 7.26591300  | -4.11572700 | -1.40668300 |
| C | -1.59988300 | -1.26415300 | 0.43721300  |
| C | -2.63495900 | -2.62165100 | -1.34237500 |
| C | -3.67012500 | -2.64242100 | -2.30548000 |
| C | -1.88413000 | -3.80153000 | -1.18557100 |
| C | -3.94549500 | -3.77329600 | -3.05329900 |
| H | -4.24473700 | -1.73058600 | -2.45079100 |

|   |             |             |             |
|---|-------------|-------------|-------------|
| C | -2.17016200 | -4.93274800 | -1.94805500 |
| H | -1.06755900 | -3.85450200 | -0.47851300 |
| C | -3.19744800 | -4.93988300 | -2.88255000 |
| H | -4.75172500 | -3.74426100 | -3.78131500 |
| H | -1.56872400 | -5.82551800 | -1.79808700 |
| H | -3.41083000 | -5.82769200 | -3.46816500 |
| N | -1.91495800 | 0.13876900  | 0.86767500  |
| N | -2.48669700 | -1.42379600 | -0.66281400 |
| N | 0.03206900  | 1.48458500  | 0.39628200  |
| H | 0.72011200  | 0.75805100  | 0.16469400  |
| H | -2.99829700 | 0.21989100  | 0.92743300  |
| N | -4.46396700 | -0.05514500 | 0.19698800  |
| H | -3.64406100 | -0.81502800 | -0.33506200 |
| H | -5.26230800 | -0.47339600 | 0.66409700  |
| C | -4.81484500 | 1.06590800  | -0.55478500 |
| C | -3.93406000 | 1.53133500  | -1.54974400 |
| C | -5.97152000 | 1.81651900  | -0.28759500 |
| C | -4.18429500 | 2.73016000  | -2.20569600 |
| H | -3.05895000 | 0.93028600  | -1.78806900 |
| C | -6.21454900 | 3.01118400  | -0.95593900 |
| H | -6.66978400 | 1.45950000  | 0.46630700  |
| C | -5.31678700 | 3.48792500  | -1.90898400 |
| H | -3.48701000 | 3.07483300  | -2.96406700 |
| H | -7.11429900 | 3.57553800  | -0.72675100 |
| H | -5.50605300 | 4.42294800  | -2.42511200 |

E(M06-2X-D3/6-31G(d,p)) = -2241.37175253 A.U.

Zero-point correction= 0.652442 (Hartree/Particle)  
 Thermal correction to Energy= 0.775272  
 Thermal correction to Enthalpy= 0.776961  
 Thermal correction to Gibbs Free Energy= 0.463160

E(M06-2X-D3/6-311+G(d,p)) = -2241.89094009 A.U.

### INT4-3

|   |             |             |             |
|---|-------------|-------------|-------------|
| N | -2.83549500 | 2.30264300  | -0.27705100 |
| N | -2.35201300 | -0.02699000 | -0.15207800 |
| N | 1.43657500  | 0.04553200  | -0.42103000 |
| N | -2.66051000 | -2.36940000 | 0.28576200  |
| N | 1.79530800  | -2.18271700 | -1.19414400 |
| N | -0.33327600 | -2.03938500 | -0.06893500 |
| C | -1.60900700 | 2.64562100  | -0.56477800 |

|   |             |             |             |
|---|-------------|-------------|-------------|
| C | 0.67776000  | 2.71735600  | -0.75148900 |
| C | -3.10626000 | 1.02318300  | 0.07865600  |
| C | -3.02714200 | -1.13782300 | 0.35920100  |
| C | 2.20421400  | -0.93951300 | -0.72659400 |
| C | -1.44752300 | -2.67586500 | -0.27759000 |
| C | 0.62896900  | -2.63047700 | -0.90709400 |
| C | -1.24042800 | 3.99307300  | -1.04490300 |
| C | 0.14480000  | 4.03031400  | -1.18646800 |
| C | -4.37355500 | 0.67258200  | 0.77463600  |
| C | 3.69431600  | 0.74212900  | -0.29091800 |
| C | -4.31694000 | -0.70644300 | 0.96312100  |
| C | 3.64507200  | -0.59716500 | -0.66129800 |
| C | 0.04726400  | -3.83634500 | -1.55849800 |
| C | -1.29410000 | -3.84933700 | -1.18119400 |
| C | 0.79402700  | 5.17220500  | -1.62367300 |
| C | -2.03421500 | 5.09066100  | -1.33621200 |
| C | -5.44921300 | 1.42338400  | 1.20881100  |
| C | 4.90296000  | 1.40213800  | -0.16519900 |
| C | -5.33578700 | -1.39421600 | 1.59411900  |
| C | 4.79218600  | -1.32981400 | -0.92092900 |
| C | 0.56637600  | -4.78184300 | -2.42138200 |
| C | -2.16977600 | -4.81555000 | -1.64050200 |
| C | 0.00237100  | 6.28003800  | -1.93089900 |
| C | -1.38886000 | 6.24132200  | -1.78865600 |
| C | -6.48675800 | 0.73697200  | 1.85075700  |
| C | 6.06934700  | 0.67610100  | -0.42622100 |
| C | -6.43053200 | -0.64474800 | 2.04057700  |
| C | 6.01556400  | -0.67011500 | -0.79453300 |
| C | -0.30747300 | -5.77218900 | -2.88482900 |
| C | -1.64938400 | -5.78904400 | -2.50118000 |
| H | 1.87392500  | 5.19025000  | -1.72343600 |
| H | -3.11079700 | 5.04138800  | -1.21329800 |
| H | -5.48079400 | 2.49671000  | 1.05488100  |
| H | 4.94520900  | 2.45210900  | 0.11100300  |
| H | -5.28211400 | -2.46871600 | 1.73475700  |
| H | 4.73168200  | -2.37234500 | -1.21522000 |
| H | 1.60916100  | -4.75179500 | -2.71949000 |
| H | -3.21361100 | -4.81471200 | -1.34477600 |
| H | 0.47263500  | 7.19142700  | -2.28586500 |
| H | -1.97197900 | 7.12266700  | -2.03434100 |
| H | -7.35165600 | 1.28667900  | 2.20802600  |
| H | 7.03462100  | 1.16618600  | -0.34517500 |
| H | -7.25205500 | -1.14503500 | 2.54297200  |
| H | 6.93901600  | -1.20561000 | -0.98971300 |

|   |             |             |             |
|---|-------------|-------------|-------------|
| H | 0.06217800  | -6.54033700 | -3.55638600 |
| H | -2.30071300 | -6.56929200 | -2.88151100 |
| C | 2.26457100  | 1.17791100  | 0.00020900  |
| C | 2.34450000  | 0.34122200  | 2.33271900  |
| C | 3.49756800  | 0.36824900  | 3.11978000  |
| C | 1.45992800  | -0.73632400 | 2.44215800  |
| C | 3.75954200  | -0.66298300 | 4.01761000  |
| H | 4.19320600  | 1.19810100  | 3.02021900  |
| C | 1.74315500  | -1.77610400 | 3.31989700  |
| H | 0.56554800  | -0.75451000 | 1.82770100  |
| C | 2.88739200  | -1.74275400 | 4.11526400  |
| H | 4.65495100  | -0.62724800 | 4.63025600  |
| H | 1.05347100  | -2.61168900 | 3.39049000  |
| H | 3.09654600  | -2.55193900 | 4.80750900  |
| N | 1.91208000  | 2.43483300  | -0.64196800 |
| N | 2.02652800  | 1.41191100  | 1.44684500  |
| H | 2.55987900  | 2.24239400  | 1.69327900  |
| N | -0.45711600 | 1.93984700  | -0.44311000 |
| H | -0.40246400 | 0.93653500  | -0.24678300 |

E(M06-2X-D3/6-31G(d,p)) = -1953.93817787 A.U.

|                                          |                             |
|------------------------------------------|-----------------------------|
| Zero-point correction=                   | 0.539879 (Hartree/Particle) |
| Thermal correction to Energy=            | 0.642685                    |
| Thermal correction to Enthalpy=          | 0.644373                    |
| Thermal correction to Gibbs Free Energy= | 0.376456                    |

E(M06-2X-D3/6-311+G(d,p)) = -1954.38836245 A.U.

#### TS4-4

|   |             |             |             |
|---|-------------|-------------|-------------|
| N | 2.97213700  | -2.57215600 | -0.05032300 |
| N | 2.77147200  | -0.20525400 | 0.20443800  |
| N | -0.78262900 | 0.20238800  | -0.77856200 |
| N | 3.33297800  | 2.01957900  | 0.83843900  |
| N | -0.76081100 | 2.47690200  | -1.40150300 |
| C | 1.80312600  | -2.71625200 | -0.64453200 |
| C | -0.38205800 | -2.49476300 | -1.30013000 |
| C | 3.32002700  | -1.38241800 | 0.46038700  |
| C | 3.48680800  | 0.73920400  | 0.92199700  |
| C | 2.37146300  | 2.47767300  | -0.00416900 |
| C | 0.42834900  | 2.76921400  | -1.08896200 |
| C | 1.38866300  | -3.98710500 | -1.27501500 |
| C | 0.06823400  | -3.84495400 | -1.70252200 |



|   |             |             |             |
|---|-------------|-------------|-------------|
| C | 4.45730700  | -1.26978700 | 1.41798800  |
| C | -3.09925900 | -0.09666600 | -0.99059300 |
| C | 4.54652700  | 0.08414300  | 1.73269100  |
| C | -2.86818900 | 1.27004900  | -0.89307500 |
| C | 1.44870500  | 3.51237500  | -1.85211400 |
| C | 2.66062300  | 3.31653800  | -1.18399100 |
| C | -0.60731800 | -4.89063800 | -2.31006300 |
| C | 2.08811700  | -5.17205600 | -1.44604300 |
| C | 5.31156500  | -2.20208300 | 1.97434600  |
| C | -4.33776100 | -0.59426200 | -1.35795400 |
| C | 5.49675500  | 0.56569900  | 2.61245000  |
| C | -3.87993400 | 2.18910600  | -1.12126000 |
| C | 1.39044700  | 4.23039600  | -3.03468100 |
| C | 3.85356000  | 3.83898700  | -1.66085000 |
| C | 0.09457400  | -6.08101000 | -2.50114200 |
| C | 1.42095200  | -6.22129300 | -2.07650200 |
| C | 6.27563100  | -1.72703700 | 2.87172900  |
| C | -5.36066300 | 0.32546400  | -1.60803600 |
| C | 6.36608600  | -0.37019500 | 3.18547300  |
| C | -5.13787700 | 1.69684200  | -1.48098300 |
| C | 2.58435500  | 4.77142600  | -3.51435000 |
| C | 3.79553000  | 4.58158600  | -2.83938700 |
| H | -1.63995400 | -4.77412300 | -2.62066000 |
| H | 3.11081100  | -5.26389900 | -1.09623100 |
| H | 5.23256500  | -3.25356900 | 1.71963400  |
| H | -4.50052200 | -1.66378800 | -1.44836600 |
| H | 5.56116500  | 1.62306200  | 2.84725200  |
| H | -3.69564500 | 3.25670100  | -1.04164400 |
| H | 0.44963800  | 4.35969500  | -3.55845000 |
| H | 4.78696500  | 3.67291200  | -1.13352500 |
| H | -0.39741200 | -6.91894400 | -2.98447500 |
| H | 1.93257900  | -7.16445800 | -2.23735400 |
| H | 6.96783100  | -2.42483500 | 3.33177000  |
| H | -6.34115800 | -0.03036300 | -1.90934600 |
| H | 7.12515900  | -0.03598000 | 3.88519200  |
| H | -5.94831200 | 2.39122700  | -1.68015100 |
| H | 2.57677000  | 5.34932300  | -4.43272400 |
| H | 4.70360300  | 5.01465300  | -3.24524700 |
| C | -1.80100800 | -0.77867400 | -0.60684400 |
| C | -2.80100100 | -2.14895700 | 1.29618700  |
| C | -2.38445400 | -3.46905300 | 1.49252300  |
| C | -4.13413100 | -1.81474800 | 1.55410900  |
| C | -3.28165400 | -4.43654300 | 1.93311000  |
| H | -1.34800200 | -3.73309200 | 1.29224400  |

|   |             |             |             |
|---|-------------|-------------|-------------|
| C | -5.03390700 | -2.78851700 | 1.97303100  |
| H | -4.45043800 | -0.78518700 | 1.42114200  |
| C | -4.61302900 | -4.10222300 | 2.16661600  |
| H | -2.93987000 | -5.45571400 | 2.08536400  |
| H | -6.06670400 | -2.51528600 | 2.16662000  |
| H | -5.31494700 | -4.85715400 | 2.50570000  |
| N | -1.56395900 | -2.04377800 | -1.31739900 |
| N | -1.89038100 | -1.13325800 | 0.88394000  |
| H | -0.94106500 | -1.41232700 | 1.12974200  |
| N | 0.76386800  | -1.87037100 | -0.72925000 |
| H | 0.69979300  | -0.84336200 | -0.54128500 |
| C | -1.39617900 | 1.44267500  | -0.57038300 |
| N | 1.08707300  | 2.25937900  | 0.07582200  |
| H | 0.24528100  | 1.89529100  | 0.79497200  |
| N | -1.20045300 | 1.80924100  | 0.95337300  |
| H | -1.49179800 | 0.93286800  | 1.39821100  |
| C | -1.95383100 | 2.90486200  | 1.47465000  |
| C | -3.13453100 | 2.66386400  | 2.18184400  |
| C | -1.53693000 | 4.22064500  | 1.26303100  |
| C | -3.88704300 | 3.72375000  | 2.67337500  |
| H | -3.45800400 | 1.63616100  | 2.32836700  |
| C | -2.30150900 | 5.27854600  | 1.74587200  |
| H | -0.61394100 | 4.41558000  | 0.72681800  |
| C | -3.47675200 | 5.03626300  | 2.45186600  |
| H | -4.80182900 | 3.52278000  | 3.22174500  |
| H | -1.97033700 | 6.29807400  | 1.57512800  |
| H | -4.06762200 | 5.86460200  | 2.82856500  |

E(M06-2X-D3/6-31G(d,p)) = -2241.37822791 A.U.

Zero-point correction= 0.655574 (Hartree/Particle)  
 Thermal correction to Energy= 0.776885  
 Thermal correction to Enthalpy= 0.778574  
 Thermal correction to Gibbs Free Energy= 0.471062

E(M06-2X-D3/6-311+G(d,p)) = -2241.89776855 A.U.

#### INT4-4

|   |             |             |             |
|---|-------------|-------------|-------------|
| N | -0.47553300 | 3.68734700  | -0.32599200 |
| N | -1.84304200 | 1.72920200  | -0.21668900 |
| N | 0.75256200  | -1.00067000 | -0.27581600 |
| N | -3.86592100 | 0.44542400  | -0.15921300 |
| N | -0.62711000 | -2.95758400 | -0.91476100 |

|   |             |             |             |
|---|-------------|-------------|-------------|
| C | 0.60709200  | 3.00774100  | -0.69276100 |
| C | 2.17859400  | 1.38376400  | -1.06586000 |
| C | -1.59802400 | 3.03917100  | -0.04822800 |
| C | -3.17260200 | 1.53857900  | 0.02608200  |
| C | -3.24828700 | -0.68807400 | -0.54437400 |
| C | -1.72203300 | -2.32970000 | -0.97072100 |
| C | 1.76940600  | 3.64961300  | -1.32563100 |
| C | 2.71634200  | 2.65720700  | -1.58549100 |
| C | -2.80837000 | 3.76316300  | 0.42074600  |
| C | 2.79954300  | -2.13257200 | -0.60070900 |
| C | -3.81373500 | 2.80187900  | 0.47245800  |
| C | 1.79837400  | -3.08327300 | -0.60677700 |
| C | -3.05018300 | -2.84660400 | -1.35199400 |
| C | -3.98414100 | -1.85043800 | -1.05576200 |
| C | 3.93279400  | 2.96287900  | -2.17414000 |
| C | 1.99090200  | 4.97986400  | -1.65497200 |
| C | -3.04383000 | 5.08227600  | 0.75598400  |
| C | 4.08934600  | -2.44560900 | -1.00086900 |
| C | -5.10037700 | 3.11507200  | 0.86542800  |
| C | 2.04332400  | -4.39356500 | -0.98293400 |
| C | -3.44960000 | -4.07765400 | -1.84792400 |
| C | -5.34589300 | -2.04065700 | -1.24949400 |
| C | 4.16107500  | 4.29633300  | -2.51256200 |
| C | 3.20686500  | 5.29026700  | -2.25857800 |
| C | -4.34184300 | 5.41078300  | 1.16631700  |
| C | 4.35242100  | -3.76313100 | -1.38304600 |
| C | -5.34934500 | 4.44654400  | 1.22065700  |
| C | 3.34323300  | -4.72714900 | -1.37011200 |
| C | -4.81488200 | -4.27383100 | -2.05119500 |
| C | -5.74993700 | -3.27265700 | -1.75670500 |
| H | 4.66841100  | 2.18670700  | -2.35468200 |
| H | 1.24111200  | 5.73455000  | -1.44326000 |
| H | -2.25412600 | 5.82403400  | 0.70111900  |
| H | 4.86323300  | -1.68457200 | -1.02368100 |
| H | -5.87683900 | 2.35795900  | 0.89641900  |
| H | 1.24105300  | -5.12571300 | -1.01101300 |
| H | -2.71870500 | -4.84894400 | -2.06578000 |
| H | -6.05329100 | -1.25453500 | -1.00822700 |
| H | 5.10011700  | 4.57417500  | -2.98043300 |
| H | 3.42386800  | 6.31707500  | -2.53344000 |
| H | -4.57181700 | 6.43395700  | 1.44508400  |
| H | 5.35095700  | -4.03928700 | -1.70757300 |
| H | -6.34416800 | 4.73745700  | 1.54171000  |
| H | 3.56853500  | -5.74163100 | -1.68492500 |

|   |             |             |             |
|---|-------------|-------------|-------------|
| H | -5.16500600 | -5.22322100 | -2.44347800 |
| H | -6.80409200 | -3.46510000 | -1.92585400 |
| C | 2.17100500  | -0.82200900 | -0.16853100 |
| C | 3.92546600  | -0.30818900 | 1.58473600  |
| C | 4.50015300  | 0.96377100  | 1.67376700  |
| C | 4.70891900  | -1.42683300 | 1.88737200  |
| C | 5.83218700  | 1.11557100  | 2.04588900  |
| H | 3.89404300  | 1.83712400  | 1.44125300  |
| C | 6.04637200  | -1.27355200 | 2.23445500  |
| H | 4.24434700  | -2.40651000 | 1.85194200  |
| C | 6.61460000  | -0.00363100 | 2.31626700  |
| H | 6.26119900  | 2.11063200  | 2.11597200  |
| H | 6.64325600  | -2.15103200 | 2.46377400  |
| H | 7.65550600  | 0.11282500  | 2.60027700  |
| N | 2.76560000  | 0.27364600  | -0.97766200 |
| N | 2.55677700  | -0.49155000 | 1.24903200  |
| H | 2.03174400  | 0.34918300  | 1.48162200  |
| N | 0.88620000  | 1.70956400  | -0.55937900 |
| H | 0.28060700  | 0.94354700  | -0.24108600 |
| C | 0.52141200  | -2.39350300 | -0.17841000 |
| N | -1.96031000 | -0.98964200 | -0.54744400 |
| H | -1.15425500 | -0.42218200 | -0.26048700 |
| N | 0.22830100  | -2.92279900 | 1.24548300  |
| H | 0.10970500  | -3.93167500 | 1.17169300  |
| C | -0.88934200 | -2.34276500 | 1.86284000  |
| C | -2.12619000 | -2.99871900 | 1.93758900  |
| C | -0.78823200 | -1.02616700 | 2.34379800  |
| C | -3.24966800 | -2.33644000 | 2.42317700  |
| H | -2.20876800 | -4.01745300 | 1.56559700  |
| C | -1.91748400 | -0.36446600 | 2.80873000  |
| H | 0.19110500  | -0.56526900 | 2.32847400  |
| C | -3.15591300 | -1.00828500 | 2.83416100  |
| H | -4.20547700 | -2.85087200 | 2.45517700  |
| H | -1.83364300 | 0.65967500  | 3.16157500  |
| H | -4.03839200 | -0.48148400 | 3.18326700  |

E(M06-2X-D3/6-31G(d,p)) = -2241.39435842 A.U.

Zero-point correction= 0.659132 (Hartree/Particle)  
 Thermal correction to Energy= 0.781646  
 Thermal correction to Enthalpy= 0.783334  
 Thermal correction to Gibbs Free Energy= 0.475767

E(M06-2X-D3/6-311+G(d,p)) = -2241.91473298 A.U.

**TS4-5**

|   |             |             |             |
|---|-------------|-------------|-------------|
| N | -1.12324200 | 3.17361700  | -1.11250800 |
| N | -2.23652900 | 1.06313000  | -0.64402300 |
| N | 0.66721300  | -1.38780500 | -0.86138800 |
| N | -4.03259200 | -0.48784200 | -0.11747900 |
| N | -0.44813400 | -3.51892500 | -0.93096100 |
| C | 0.04369300  | 2.67251400  | -1.38751900 |
| C | 1.78530100  | 1.18127600  | -1.60612500 |
| C | -2.15992600 | 2.42558500  | -0.69197300 |
| C | -3.48664900 | 0.74922500  | -0.23333000 |
| C | -3.37011600 | -1.57702400 | -0.32627000 |
| C | -1.63586300 | -3.02604100 | -0.72844700 |
| C | 1.17510200  | 3.39373500  | -1.95791100 |
| C | 2.22999600  | 2.48507300  | -2.11664800 |
| C | -3.41664800 | 3.02361100  | -0.27813400 |
| C | 2.88641700  | -2.22526700 | -0.93546100 |
| C | -4.26569100 | 1.94676700  | 0.02762400  |
| C | 1.99215900  | -3.28308900 | -1.01331800 |
| C | -2.85130400 | -3.82324800 | -0.51214000 |
| C | -3.90384700 | -2.93718900 | -0.25358100 |
| C | 3.45827000  | 2.88078000  | -2.63427200 |
| C | 1.31753600  | 4.72932600  | -2.32841200 |
| C | -3.84978400 | 4.34363700  | -0.14520700 |
| C | 4.24789600  | -2.41839100 | -1.09355100 |
| C | -5.57256200 | 2.15985600  | 0.46682200  |
| C | 2.41974600  | -4.58893600 | -1.19791700 |
| C | -3.03913800 | -5.19863200 | -0.50443600 |
| C | -5.18434000 | -3.40499800 | 0.01874800  |
| C | 3.59961900  | 4.21219500  | -3.00607200 |
| C | 2.54076600  | 5.12358500  | -2.85440000 |
| C | -5.14928600 | 4.55346400  | 0.29502000  |
| C | 4.69217200  | -3.72951900 | -1.28591100 |
| C | -6.00110000 | 3.47357600  | 0.59787500  |
| C | 3.79317600  | -4.79942000 | -1.32654400 |
| C | -4.32114500 | -5.66931900 | -0.23643200 |
| C | -5.37750000 | -4.78296300 | 0.02153700  |
| H | 4.26459400  | 2.16293900  | -2.74091000 |
| H | 0.49387800  | 5.42415600  | -2.20510200 |
| H | -3.18736300 | 5.16895200  | -0.38561800 |
| H | 4.93738300  | -1.58055700 | -1.07132500 |
| H | -6.22126700 | 1.32058300  | 0.69559100  |
| H | 1.70247200  | -5.40063500 | -1.25598100 |

|   |             |             |             |
|---|-------------|-------------|-------------|
| H | -2.20812800 | -5.86760700 | -0.70123500 |
| H | -5.99259700 | -2.70999500 | 0.21923000  |
| H | 4.54110700  | 4.55836500  | -3.41993600 |
| H | 2.68613600  | 6.15623200  | -3.15527100 |
| H | -5.52204800 | 5.56672900  | 0.40739500  |
| H | 5.75265600  | -3.92133900 | -1.41536200 |
| H | -7.01137500 | 3.67773100  | 0.93857000  |
| H | 4.17188600  | -5.80503900 | -1.47912000 |
| H | -4.51036500 | -6.73763800 | -0.22448700 |
| H | -6.36483800 | -5.18402000 | 0.22741800  |
| C | 2.06628800  | -0.97705500 | -0.71338400 |
| C | 3.37541000  | -0.14764700 | 1.34127800  |
| C | 3.65820500  | 1.19047000  | 1.63628200  |
| C | 4.23967300  | -1.15833000 | 1.78292500  |
| C | 4.81230900  | 1.51832300  | 2.34054300  |
| H | 2.97548100  | 1.96551500  | 1.29566200  |
| C | 5.39331800  | -0.81891300 | 2.47758200  |
| H | 3.99185400  | -2.19562500 | 1.58358100  |
| C | 5.68457100  | 0.51692600  | 2.75686700  |
| H | 5.02913400  | 2.55859200  | 2.55958600  |
| H | 6.06229000  | -1.60280900 | 2.81727300  |
| H | 6.58432200  | 0.77310800  | 3.30606400  |
| N | 2.52988700  | 0.13442800  | -1.48719100 |
| N | 2.14790700  | -0.48495200 | 0.72620100  |
| H | 1.53382400  | 0.32978100  | 0.73507800  |
| N | 0.47773600  | 1.37276800  | -1.19015500 |
| H | -0.15176600 | 0.62450300  | -0.92525500 |
| C | 0.63644900  | -2.68909000 | -0.93909200 |
| N | -2.01870700 | -1.71898000 | -0.63007000 |
| H | -1.39150400 | -0.93974900 | -0.78095500 |
| N | 0.75999100  | -1.22274000 | 2.24202600  |
| H | 1.59152100  | -1.53683800 | 2.75228100  |
| C | 0.34979900  | -0.03795800 | 2.73322100  |
| C | 1.04112000  | 0.70134300  | 3.74065000  |
| C | -0.80403700 | 0.54488300  | 2.13420700  |
| C | 0.56133600  | 1.92902000  | 4.14636700  |
| H | 1.93606100  | 0.27347900  | 4.18636500  |
| C | -1.26312300 | 1.78536500  | 2.54331500  |
| H | -1.30460800 | -0.01715800 | 1.35463700  |
| C | -0.58744600 | 2.47597500  | 3.55227200  |
| H | 1.07807100  | 2.48010000  | 4.92546400  |
| H | -2.14599900 | 2.21360600  | 2.07686700  |
| H | -0.95046200 | 3.44488400  | 3.87844000  |

E(M06-2X-D3/6-31G(d,p)) = -2241.36973641 A.U.

Zero-point correction= 0.658144 (Hartree/Particle)  
Thermal correction to Energy= 0.780286  
Thermal correction to Enthalpy= 0.781974  
Thermal correction to Gibbs Free Energy= 0.473450

E(M06-2X-D3/6-311+G(d,p)) = -2241.88676952 A.U.

### Phthalocyanine

|   |             |             |             |
|---|-------------|-------------|-------------|
| N | -2.37102600 | -2.39182900 | 0.00013300  |
| N | -2.37651000 | 2.38650000  | 0.00004200  |
| N | 0.00224800  | -1.93351100 | -0.00001200 |
| N | -0.00226200 | 1.93348300  | 0.00002600  |
| N | 2.37649800  | -2.38654900 | 0.00001700  |
| N | 2.37102000  | 2.39180000  | -0.00009000 |
| C | -2.77245100 | -1.14171100 | 0.00011600  |
| C | -2.77501300 | 1.13548500  | 0.00007600  |
| C | -1.08716200 | -2.74474700 | 0.00010900  |
| C | 1.09345600  | -2.74238000 | 0.00006500  |
| C | 1.08720700  | 2.74475900  | -0.00005600 |
| C | 2.77501300  | -1.13547100 | -0.00003000 |
| C | 2.77248500  | 1.14170800  | -0.00007700 |
| C | -4.15796900 | -0.70655400 | 0.00011400  |
| C | -4.15954100 | 0.69714800  | 0.00009500  |
| C | -0.69319600 | -4.15759000 | 0.00005100  |
| C | -0.70260100 | 4.15606700  | -0.00001200 |
| C | 0.70260700  | -4.15611300 | 0.00001700  |
| C | 0.69320300  | 4.15756600  | -0.00005300 |
| C | 4.15797900  | 0.70650800  | -0.00010600 |
| C | 4.15952900  | -0.69718700 | -0.00008000 |
| C | -5.35270000 | 1.41929400  | 0.00009100  |
| C | -1.41794900 | -5.34295400 | 0.00003700  |
| C | -1.42957000 | 5.34008600  | -0.00000400 |
| C | 1.42955600  | -5.34013600 | -0.00003600 |
| C | 1.41793300  | 5.34295500  | -0.00008700 |
| C | 5.34977200  | 1.43093000  | -0.00015100 |
| C | 5.35276100  | -1.41922600 | -0.00009600 |
| C | -6.53635500 | 0.69735100  | 0.00010700  |
| C | -0.69464700 | -6.53272000 | -0.00000400 |
| C | -0.70854800 | 6.53125600  | -0.00004000 |
| C | 0.70850800  | -6.53129900 | -0.00004000 |
| C | 0.69461400  | 6.53270000  | -0.00008100 |

|   |             |             |             |
|---|-------------|-------------|-------------|
| C | 6.53485700  | 0.71133400  | -0.00016600 |
| C | 6.53636200  | -0.69723100 | -0.00013900 |
| H | -5.33883200 | 2.50375000  | 0.00007400  |
| H | -2.50273100 | -5.33126900 | 0.00006700  |
| H | -2.51433600 | 5.32652200  | 0.00002700  |
| H | 2.51432200  | -5.32660300 | -0.00005800 |
| H | 2.50271600  | 5.33128500  | -0.00012000 |
| H | 5.33399400  | 2.51536800  | -0.00017000 |
| H | 5.33901700  | -2.50368800 | -0.00007300 |
| H | -7.48527900 | 1.22367200  | 0.00010500  |
| H | -1.22237600 | -7.48108600 | -0.00000700 |
| H | -1.23820200 | 7.47855300  | -0.00003800 |
| H | 1.23815100  | -7.47860200 | -0.00006900 |
| H | 1.22231800  | 7.48108000  | -0.00011000 |
| H | 7.48271200  | 1.23957500  | -0.00019900 |
| H | 7.48533400  | -1.22345500 | -0.00015200 |
| C | -1.09341100 | 2.74233700  | 0.00000900  |
| N | -2.00943800 | -0.00226800 | 0.00008700  |
| H | -0.99669400 | -0.00101700 | 0.00009200  |
| N | 2.00945700  | 0.00223200  | -0.00004600 |
| H | 0.99671300  | 0.00098700  | -0.00004400 |
| C | -6.53487800 | -0.71121700 | 0.00012600  |
| H | -7.48281100 | -1.23930300 | 0.00013900  |
| C | -5.34982300 | -1.43086000 | 0.00012900  |
| H | -5.33408100 | -2.51530900 | 0.00014300  |

E(M06-2X-D3/6-31G(d,p)) = -1667.70561573 A.U.

Zero-point correction= 0.440345 (Hartree/Particle)  
 Thermal correction to Energy= 0.525583  
 Thermal correction to Enthalpy= 0.527272  
 Thermal correction to Gibbs Free Energy= 0.299953

E(M06-2X-D3/6-311+G(d,p)) = -1668.08368330 A.U.

### Hydrazobenzene

|   |            |             |             |
|---|------------|-------------|-------------|
| C | 1.61900200 | -0.57076500 | 0.03784000  |
| C | 2.88516000 | -0.96243500 | -0.41503600 |
| C | 1.41185700 | 0.75340400  | 0.43655800  |
| C | 3.92363000 | -0.04401700 | -0.46585400 |
| H | 3.04650400 | -1.99116600 | -0.72698600 |
| C | 2.46445400 | 1.66312300  | 0.38013000  |
| H | 0.43051400 | 1.07652700  | 0.76679300  |



|   |             |             |             |
|---|-------------|-------------|-------------|
| C | 3.72302700  | 1.27673600  | -0.06696000 |
| H | 4.89956600  | -0.36510700 | -0.81635500 |
| H | 2.28967000  | 2.68906100  | 0.68918000  |
| H | 4.53688500  | 1.99215500  | -0.10714900 |
| N | 0.57655600  | -1.51106700 | 0.04540500  |
| H | 0.88223700  | -2.47437200 | 0.07540500  |
| N | -0.51769100 | -1.29714300 | 0.87213600  |
| H | -0.25833700 | -0.98916400 | 1.80696700  |
| C | -1.59096700 | -0.56080300 | 0.33340700  |
| C | -2.52957200 | -0.00549300 | 1.21027500  |
| C | -1.75929100 | -0.40672400 | -1.04421600 |
| C | -3.62462300 | 0.68832100  | 0.71184700  |
| H | -2.39870800 | -0.12772700 | 2.28273700  |
| C | -2.86151700 | 0.28970800  | -1.52856100 |
| H | -1.02158300 | -0.82882400 | -1.71606900 |
| C | -3.80065600 | 0.84115600  | -0.66144900 |
| H | -4.34430000 | 1.11288100  | 1.40491300  |
| H | -2.98181100 | 0.40556400  | -2.60144900 |
| H | -4.65571600 | 1.38438700  | -1.04864600 |

E(M06-2X-D3/6-31G(d,p)) = -573.741676462 A.U.

|                                          |                             |
|------------------------------------------|-----------------------------|
| Zero-point correction=                   | 0.217574 (Hartree/Particle) |
| Thermal correction to Energy=            | 0.252097                    |
| Thermal correction to Enthalpy=          | 0.253785                    |
| Thermal correction to Gibbs Free Energy= | 0.132132                    |

E(M06-2X-D3/6-311+G(d,p)) = -573.879518450 A.U.
